# Supplementary material
Source: PubMed Central journal article supplement (PMC7656848)
Supplement: 41401_2019_352_MOESM1_ESM.pdf [file 41401_2019_352_MOESM1_ESM.pdf]

Supplementary Table 1 Compound in XFZY decoction.

| Traditional Chinese Medicine | Compound                                                                                                                                                                                                                                                                                                                                                                                                                                                                                                                                                                                                                                                                                                                                                                                                                                                                                                                                                                                                                                                                                                                                                                                                                         |
|------------------------------|----------------------------------------------------------------------------------------------------------------------------------------------------------------------------------------------------------------------------------------------------------------------------------------------------------------------------------------------------------------------------------------------------------------------------------------------------------------------------------------------------------------------------------------------------------------------------------------------------------------------------------------------------------------------------------------------------------------------------------------------------------------------------------------------------------------------------------------------------------------------------------------------------------------------------------------------------------------------------------------------------------------------------------------------------------------------------------------------------------------------------------------------------------------------------------------------------------------------------------|
| Peach kernel                 | campesterol-3-O- $\beta$ -D-glucopyranoside C34H58O6R<br>triolein C57H104O6<br>7-dehydroavenasterol C29H48O<br>methyl- $\alpha$ -D-fructofuranoside C7H14O6<br>methyl- $\beta$ -D-glucopyranoside C7H14O6<br>3-O-p-coumaroylquinic acid C16H18O8<br>24-methylenecycloartanol C31H52O<br>linoleic acid C18H32O2<br>tryptophane C11H12N2O2<br>$\beta$ -sitosterol-3-O- $\beta$ -D-glucopyranoside / daucosterol / strumaroside /<br>daucosterin C35H60O6<br>$\beta$ -sitosterol C29H50O<br>eleutheroside A C35H60O6<br>alexandrin C35H60O6<br>$\beta$ -sitosterol 3-O- $\beta$ -D-(6-O-oleyl)glucopyranoside C53H92O7<br>$\beta$ -sitosterol-3-(6-palmitoyl)glucopyranoside C51H90O7<br>3-feruloylquinic acid C17H20O9<br>prunasin / (R)-2-O- $\beta$ -D-glucopyranosyloxyphenylacetone nitrile C14H17NO6<br>amygdalin C20H27NO11<br>chlorogenic acid C16H18O9<br>3-caffeoylquinic acid C16H18O9<br>4 $\alpha$ -methylstigmasta-7,24(24')-Z-dienol / citrostadienol C30H50O<br>campesterol C28H48O<br>campesterol-3-O- $\beta$ -D-(6-O-oleyl)glucopyranoside C52H90O7<br>campesterol-3-O- $\beta$ -D-(6-O-palmityl)glucopyranoside C50H88O7<br>5'-caffeoylquinic acid C16H18O9<br>D-glucose / glucose C6H12O6<br>sucrose C12H22O11 |
| Bupleurum                    | 3"-O-acetylsaikosaponin a C44H70O14<br>3"-O-acetylsaikosaponin b2 C44H70O14<br>3"-O-acetylsaikosaponin b3 C45H74O15<br>3"-O-acetylsaikosaponin d C44H70O14<br>citronellyl acetate C12H22O2<br>ethyl geranate / geranyl acetate C12H20O2<br>3",6"-O,O-diacetylsaikosaponin b2 C46H72O15<br>limonene / dipentene C10H16<br>4,8-dimethyltridecane C15H32<br>2,6-dimethyloctane C10H22<br>eugenol C10H12O2<br>$\beta$ -caryophyllene C15H24                                                                                                                                                                                                                                                                                                                                                                                                                                                                                                                                                                                                                                                                                                                                                                                          |

---

caryophellene C15H24  
 $\gamma$ -undecalactone C11H20O2  
heptadecane C17H36  
hexadecanoic acid C16H32O2  
chikusaikosideII C48H78O18  
guercetol / quercetin C15H10O7  
 $\alpha$ -fenchene C10H16  
 $\beta$ -fenchene C10H16  
kaempferitrin C27H30O14  
kaempferol-3,7- $\alpha$ -L-dirhamnoside C27H30O14  
kaempferol C15H10O6  
kaempferol / 3,5,7,4'-tetrahydroxyflavone-3-rhamnoglucoside /  
3,5,7,4'-tetrahydroxyflavone C15H10O6  
kaempferol-7-O-rhamnoside C21H20O10  
 $\gamma$ -patchoulene C15H24  
caproic acid C6H12O2  
verbenone C10H14O  
xylose C5H10O5  
2-nonenic acid C9H16O2  
pelargonic acid C9H18O2  
longifolene C15H24  
myrcene C10H16  
borneol C10H18O  
hexahydrofarnesyl acetone C18H36O  
6,7,3',8'-diligustilide C24H28O4  
n-undecane C11H24  
n-tridecane C13H28  
n-pentadecane C15H32  
n-tetradecane C14H30  
n-heptanal C7H14O  
 $\beta$ -gurjunene C15H24  
bornene C10H16  
2-pentylfuran C9H14O  
valeric acid C5H10O2  
11  $\alpha$ -methoxysaikosaponin f C47H78O18  
5-methyl-5-ethyldecane C13H28  
3-methyldodecane C13H28  
2-methylhexadecane C17H36  
2-methylheptane C8H18  
4-methyl-3-hetanone C8H16O  
5-methyldecane C11H24  
galactose C6H12O6  
pregnenolone C21H32O2  
p-isopropylbenzoic acid C10H12O2

---

---

thymol C10H14O  
 $\gamma$ -muurolene C15H24  
caprylic acid C8H16O2  
isoborneol C10H18O  
isopinocampone C10H16O  
isopulegol C15H22O  
isoquercetin C21H20O12  
rutin / rutoside C28H32O15  
rutin / quercetin-3- $\beta$ -D-glucopyranosyl-7-O- $\alpha$ -L-rhamnoside C27H30O16  
linalool C10H18O  
veratryl alcohol C9H12O3  
stigmasta-7,22-dien-3- $\beta$ -ol / chondrillasterol / bessisterol /  $\alpha$ -spinasterol  
C5H11NO2  
2"-O- $\beta$ -D-xylopyranosyl saikosaponin b2 C47H76O17  
saikosaponin S1 C46H74O17  
2"-O- $\beta$ -D-glucopyranosyl saikosaponin b2 C47H76O18  
o-methoxyphenol C7H8O2  
2-octenoic acid C8H14O2  
4-octanolide /  $\gamma$ -octalactone C8H14O2  
octanal C8H16O  
arabinose C5H10O5  
nootkatone C15H22O  
cyclohexanone C6H10O  
16-epichikusaikoside C47H76O17  
phenol C6H6O  
 $\beta$ -terpinene C10H16  
4-terpineol C10H18O  
 $\alpha$ -terpineol C10H18O  
nerolidol C15H26O  
ocimene C10H16  
adonitol C5H12O5  
 $\beta$ -thujene C10H16  
farnesylacetone C17H28O2  
 $\alpha$ -farnesene C15H24  
 $\beta$ -farnesene C15H24  
farnesene C15H24  
2-heptenoic acid C7H12O2  
3-heptanone C7H14O  
heptanoic acid / enanthic acid C7H14O2  
 $\alpha$ -copaene C15H24  
 $\alpha$ -cubebene C15H24  
 $\gamma$ -cadinene C15H24  
 $\delta$ -cadinol /  $\delta$ -cadinene C15H24  
pulegone C10H16O

---

---

$\beta$  -cedrene C15H24  
cedrenol C15H24O  
carveol C10H16O2  
coumarin C9H6O2  
carvacrol C10H14O  
aromadendrene C15H24  
senkyunolide H C12H16O4  
prosaikogenin F C36H58O8  
 $\gamma$  -decalactone C10H18O2  
myrtenol C10H16O  
cineole C10H18O  
 $\alpha$  -eudesmol C15H26O  
ribose C5H10O5  
saikosaponin A C42H68O13  
3-O-  $\alpha$  -L-arabinopyranosyl(1 $\rightarrow$ 3)-  $\beta$  -D-glucuronopyranosyl oleanolic acid-28-  
 $\beta$  -D-glucopyranosyl ester C47H74O18  
acoradiene C15H24  
 $\alpha$  -spinasteryl glucoside C35H58O6  
 $\alpha$  -himachalene C15H24  
geranyl acetone C13H22O  
geraniol C10H18O  
 $\beta$  -bisabolene C15H24  
3-carene C10H16  
carvone C10H14O  
humulene C15H24  
D-glucose / glucose C6H12O6  
 $\beta$  -pinene C9H14O  
ledol C15H26O  
 $\beta$  -elemene C15H24  
rhamnose C6H12O5  
 $\alpha$  -guaiene C15H24  
camphene C10H16  
menthone C10H18O  
neral C10H16O  
citral-b C10H16O  
 $\alpha$  -santene C9H14  
prosaikogenin G C36H58O8  
saikosaponin b2 C42H68O13  
saikosaponin b3 C43H72O14  
saikosaponin b4 C43H72O14  
saikosaponin c C48H78O17  
saikosaponin d C42H68O13  
saikosaponin e C42H68O12  
D-glucose / glucose C6H12O6

---

|          |                                                                                 |
|----------|---------------------------------------------------------------------------------|
|          | geranyl acetate / ethyl geranate C12H20O2                                       |
|          | $\delta$ -cadinene / $\delta$ -cadinol C15H26O                                  |
|          | xylose C5H10O5                                                                  |
|          | arabinose C5H10O5                                                               |
|          | isoborneol C10H18O                                                              |
|          | isopulegol C10H18O                                                              |
|          | D-glucose / glucose C6H12O6                                                     |
|          | quercetol / querceton C30H26O15                                                 |
|          | $\alpha$ -acoradiene C15H24                                                     |
|          | $\beta$ -acoradiene C15H24                                                      |
|          | $\gamma$ -acoradiene C15H24                                                     |
|          | trans-carveol C10H16O2                                                          |
|          | $\beta$ -terpinene C10H16                                                       |
|          | 4-terpineol C10H18O                                                             |
|          | $\alpha$ -terpineol C10H18O                                                     |
|          | 6"-O-acetylsaikosaponin a                                                       |
|          | 3,3,5-trimethylheptane                                                          |
|          | kaempferol-3-O- $\alpha$ -L-arabinopyranoside-7-O- $\alpha$ -L-rhamnopyranoside |
|          | patchoulane                                                                     |
|          | 6,7,3'a,6'-diligustilide                                                        |
|          | 7-methyltridecane                                                               |
|          | 3-methyl-3-isopropylbenzene                                                     |
|          | 2-methylcyclopentanone                                                          |
|          | cresol                                                                          |
|          | messoia lactone                                                                 |
| Angelica | 4-ethylresorcinol C8H10O2                                                       |
|          | 2,3-dimethylphenol C8H10O                                                       |
|          | 3,4-dimethylbenzaldehyde C9H10O                                                 |
|          | 2,4-dihydroxyacetophenone C8H8O3                                                |
|          | succinic acid C4H6O4                                                            |
|          | 1,1,5-trimethyl-2-formylcyclohexa-2,5-diene-4-one C10H12O2                      |
|          | 2,4,6-trimethylbenzaldehyde C10H12O                                             |
|          | verbenone C10H14O                                                               |
|          | aspartate / asparagic acid / asparaginic acid / aspartic acid C4H7NO4           |
|          | xylose C5H10O5                                                                  |
|          | anchoic acid C9H16O4                                                            |
|          | azelaic acid C9H16O4                                                            |
|          | myrcene C10H16                                                                  |
|          | bicycloelemene C15H24                                                           |
|          | 6-n-butyl-1,4-cycloheptadiene C11H18                                            |
|          | n-butylphthalide C12H14O2                                                       |
|          | n-tetradecanol C14H30O                                                          |
|          | glycine C2H5NO2                                                                 |
|          | alanine C3H7NO2                                                                 |

---

brefeldin A C<sub>16</sub>H<sub>24</sub>O<sub>4</sub>  
scopoletin C<sub>10</sub>H<sub>8</sub>O<sub>4</sub>  
scopoletin / 6-methoxy-7-hydroxycoumarin C<sub>10</sub>H<sub>8</sub>O<sub>4</sub>  
baogongteng B / scopoletin C<sub>10</sub>H<sub>8</sub>O<sub>4</sub>  
2-methyldodecan-5-one C<sub>13</sub>H<sub>26</sub>O  
methionine C<sub>5</sub>H<sub>11</sub>NO<sub>2</sub>S  
galactose C<sub>6</sub>H<sub>12</sub>O<sub>6</sub>  
galacturonic acid C<sub>6</sub>H<sub>10</sub>O<sub>7</sub>  
p-ethylbenzaldehyde C<sub>9</sub>H<sub>10</sub>O  
p-cresol C<sub>7</sub>H<sub>8</sub>O  
serine C<sub>3</sub>H<sub>7</sub>NO<sub>3</sub>  
butylidenephthalide C<sub>12</sub>H<sub>12</sub>O<sub>2</sub>  
eucarvone C<sub>10</sub>H<sub>14</sub>O  
tryptophane C<sub>11</sub>H<sub>12</sub>N<sub>2</sub>O<sub>2</sub>  
isoeugenol C<sub>10</sub>H<sub>12</sub>O<sub>2</sub>  
isoleucine C<sub>6</sub>H<sub>13</sub>NO<sub>2</sub>  
isoacoradiene C<sub>15</sub>H<sub>24</sub>  
cuparene C<sub>15</sub>H<sub>22</sub>  
β -selinene C<sub>15</sub>H<sub>24</sub>  
β -sitosterol-3-O- β -D-glucopyranoside / daucosterol / strumaroside /  
daucosterin C<sub>35</sub>H<sub>60</sub>O<sub>6</sub>  
threonine C<sub>4</sub>H<sub>9</sub>NO<sub>3</sub>  
alloocimene C<sub>10</sub>H<sub>16</sub>  
β -sitosterol C<sub>29</sub>H<sub>50</sub>O  
eleutheroside A C<sub>35</sub>H<sub>60</sub>O<sub>6</sub>  
alexandrin C<sub>35</sub>H<sub>60</sub>O<sub>6</sub>  
glutamic acid C<sub>5</sub>H<sub>9</sub>NO<sub>4</sub>  
o-cresol C<sub>7</sub>H<sub>8</sub>O  
phthalic anhydride C<sub>8</sub>H<sub>4</sub>O<sub>3</sub>  
lecithin C<sub>10</sub>H<sub>20</sub>NO<sub>9</sub>PR<sub>2</sub>  
m-ethylphenol C<sub>8</sub>H<sub>10</sub>O  
uracil C<sub>4</sub>H<sub>4</sub>N<sub>2</sub>O<sub>2</sub>  
arabinose C<sub>5</sub>H<sub>10</sub>O<sub>5</sub>  
ferulic acid C<sub>10</sub>H<sub>10</sub>O<sub>4</sub>  
acetophenone / phenylethanone C<sub>8</sub>H<sub>8</sub>O  
phenylalanine C<sub>9</sub>H<sub>11</sub>NO<sub>2</sub>  
phenol C<sub>6</sub>H<sub>6</sub>O  
fructose C<sub>6</sub>H<sub>12</sub>O<sub>6</sub>  
β -ocimene- X C<sub>17</sub>H<sub>12</sub>S<sub>2</sub>  
β -farnesene C<sub>15</sub>H<sub>24</sub>  
histidine C<sub>6</sub>H<sub>9</sub>N<sub>3</sub>O<sub>2</sub>  
α -copaene C<sub>15</sub>H<sub>24</sub>  
γ -cadinene C<sub>15</sub>H<sub>24</sub>  
anisic acid C<sub>8</sub>H<sub>8</sub>O<sub>3</sub>

---

---

$\alpha$  -cedrene C15H24  
carvacrol C10H14O  
vanillin C8H8O3  
bergamotene C15H24  
leucine C6H13NO2  
senkyunolide C12H16O2  
sphingomyelin C57H115N2O7P  
sebacic acid / decanedioic acid C10H18O4  
cystine C20H24O7  
cephalin C7H12NO8PR2  
phosphatidyl / cephalin R  
niacin / nicotinic acid C6H5NO2  
safrole C10H10O2  
acoradiene C15H24  
 $\beta$  -bisabolene C15H24  
proline C5H9NO2  
D-glucose / glucose C6H12O6  
glucuronic acid C6H10O7  
 $\alpha$  -pinene C10H16  
adenine / pedatisectine B C4H4N6  
 $\gamma$  -elemene C15H24  
lysine C6H14N2O2  
tyrosine C9H11NO3  
guaiacol C7H8O2  
angelicide C25H30O4  
lysolecithin C24H50NO7P  
LPC / lysophosphatidyl choline C9H21NO8PR  
sucrose C12H22O11  
arginine C6H14N4O2  
camphoric acid C10H16O4  
valine C5H11NO2  
ligustilide C12H14O2  
ligustilide dimer C24H28O4  
phosphatidylglycerol C12H20O13PR  
phosphatidylserine C9H15NO10PR  
phosphatdic acid C6H10O8PR  
D-glucose / glucose C6H12O6  
fructose C6H12O6  
xylose C5H10O5  
arabinose C5H10O5  
fructose C6H12O6  
cephalin C8H15NO8PR  
 $\alpha$  -acoradiene C15H24  
 $\beta$  -acoradiene C15H24

---

|                                      |                                                                                                                                                                                                                                                                                                                                                                                                                                                                                                                                                                                                                                                                                                                                                            |
|--------------------------------------|------------------------------------------------------------------------------------------------------------------------------------------------------------------------------------------------------------------------------------------------------------------------------------------------------------------------------------------------------------------------------------------------------------------------------------------------------------------------------------------------------------------------------------------------------------------------------------------------------------------------------------------------------------------------------------------------------------------------------------------------------------|
| <p>radix<br/>paeoniae<br/>rubrae</p> | <p><math>\gamma</math> -acoradiene C15H24<br/>diphosphatidylglycerol<br/>angelic ketone<br/>lecithin / phosphatidylcholine<br/><math>\beta</math> -cadinene<br/>phosphatidylinositol<br/>(Z)-2-angeloyloxymethyl-2-butenic acid<br/>salicylic acid C7H6O3</p>                                                                                                                                                                                                                                                                                                                                                                                                                                                                                              |
| <p>Achyranthes</p>                   | <p>paeoniflorin C23H28O10<br/>paeonolide C20H28O12<br/><math>\beta</math> -sitosterol C29H50O<br/>gallic acid C7H6O5<br/>benzoyl paeoniflorin C30H32O12<br/>benzoic acid C7H6O2<br/><math>\beta</math> -amyrin C30H50O<br/>oxypaeoniflorin C23H28O11<br/>8-Dibenzoylpaeoniflorin C16H24O10</p>                                                                                                                                                                                                                                                                                                                                                                                                                                                             |
| <p>Achyranthes</p>                   | <p>aspartate / asparagic acid / asparaginic acid / aspartic acid C4H7NO4<br/>inokosterone C27H44O7<br/>glycine C2H5NO2<br/>galactose C6H12O6<br/>galacturonic acid C6H10O7<br/>serine C3H7NO3<br/>tryptophane C11H12N2O2<br/>rubrosterone C19H26O5<br/>threonine C4H9NO3<br/>glutamic acid C5H9NO4<br/>arabinose C5H10O5<br/>phenylalanine C9H11NO2<br/>leucine C6H13NO2<br/>proline C5H9NO2<br/>ecdysterone / <math>\beta</math> -ecdysone C27H44O7<br/>glucuronic acid C6H10O7<br/>tyrosine C9H11NO3<br/>rhamnose C6H12O5<br/>arginine C6H14N4O2<br/>valine C5H11NO2<br/>arabinose C5H10O5<br/>oleanolic acid <math>\alpha</math> -L-rhamnopyranosyl- <math>\beta</math> -D-galactopyranoside<br/>Inokosterone<br/>Cyasterone<br/>(25R)-Inokosterone</p> |



|                             |                                                                                                                                                                                                                                                                                                                                                                                                                                                                                                                                                                                                                                                                                                                                                                                                                                                                                                                                                                                                                                                                                                                                                                                                                                                                                                                                                                                                                                                                                                                                                                                                                                                                                                                                                                                                                                                                                                                                                                                                                                                                                                                                                                                                                                                                                                                                                                                                                      |
|-----------------------------|----------------------------------------------------------------------------------------------------------------------------------------------------------------------------------------------------------------------------------------------------------------------------------------------------------------------------------------------------------------------------------------------------------------------------------------------------------------------------------------------------------------------------------------------------------------------------------------------------------------------------------------------------------------------------------------------------------------------------------------------------------------------------------------------------------------------------------------------------------------------------------------------------------------------------------------------------------------------------------------------------------------------------------------------------------------------------------------------------------------------------------------------------------------------------------------------------------------------------------------------------------------------------------------------------------------------------------------------------------------------------------------------------------------------------------------------------------------------------------------------------------------------------------------------------------------------------------------------------------------------------------------------------------------------------------------------------------------------------------------------------------------------------------------------------------------------------------------------------------------------------------------------------------------------------------------------------------------------------------------------------------------------------------------------------------------------------------------------------------------------------------------------------------------------------------------------------------------------------------------------------------------------------------------------------------------------------------------------------------------------------------------------------------------------|
| <p>Radix<br/>Rehmanniae</p> | <p>(25S)-Inokosterone<br/> Tritriacontanol<br/> Chikusetsusaponin Vmethyl ester<br/> 6-Methoxypiperidin-2-one<br/> Achyranthessaponin A<br/> Achyranthessaponin B<br/> Achyranthessaponin C<br/> Achyranthessaponin D<br/> Achyranthoside I<br/> Achyranthoside II<br/> Bidentatoside I<br/> Bidentatoside II<br/> phosphoric acid H<sub>2</sub>HO<sub>4</sub>P<br/> 1-ethyl- β -D-galactoside C<sub>8</sub>H<sub>16</sub>O<sub>6</sub><br/> aspartate / asparagic acid / asparaginic acid / aspartic acid C<sub>4</sub>H<sub>7</sub>NO<sub>4</sub><br/> stachyose C<sub>24</sub>H<sub>42</sub>O<sub>21</sub><br/> verbascose C<sub>30</sub>H<sub>52</sub>O<sub>26</sub><br/> glycine C<sub>2</sub>H<sub>5</sub>NO<sub>2</sub><br/> manninotriose C<sub>18</sub>H<sub>32</sub>O<sub>16</sub><br/> D-mannitol / cordycepic acid C<sub>10</sub>H<sub>13</sub>N<sub>5</sub>O<sub>3</sub><br/> alanine C<sub>3</sub>H<sub>7</sub>NO<sub>2</sub><br/> galactose C<sub>6</sub>H<sub>12</sub>O<sub>6</sub><br/> 6-O-p-coumaroyl ajugol C<sub>24</sub>H<sub>30</sub>O<sub>11</sub><br/> serine C<sub>3</sub>H<sub>7</sub>NO<sub>3</sub><br/> rehmannioside A C<sub>21</sub>H<sub>32</sub>O<sub>15</sub><br/> rehmannioside B C<sub>21</sub>H<sub>32</sub>O<sub>15</sub><br/> isoleucine C<sub>6</sub>H<sub>13</sub>NO<sub>2</sub><br/> β -sitosterol-3-O- β -D-glucopyranoside / daucosterol / strumaroside /<br/> daucosterin C<sub>35</sub>H<sub>60</sub>O<sub>6</sub><br/> threonine C<sub>4</sub>H<sub>9</sub>NO<sub>3</sub><br/> 6-O-(4"-O- α -L-rhamnopyranosyl)vanilloyl ajugol C<sub>30</sub>H<sub>42</sub>O<sub>15</sub><br/> eleutheroside A C<sub>35</sub>H<sub>60</sub>O<sub>6</sub><br/> alexandrin C<sub>35</sub>H<sub>60</sub>O<sub>6</sub><br/> glutamic acid C<sub>5</sub>H<sub>9</sub>NO<sub>4</sub><br/> 6-O-E-feruloyl ajugol C<sub>25</sub>H<sub>32</sub>O<sub>12</sub><br/> 6-O-Z-feruloyl ajugol C<sub>25</sub>H<sub>32</sub>O<sub>12</sub><br/> 8-epiloganic acid C<sub>16</sub>H<sub>24</sub>O<sub>10</sub><br/> phenylalanine C<sub>9</sub>H<sub>11</sub>NO<sub>2</sub><br/> fructose C<sub>6</sub>H<sub>12</sub>O<sub>6</sub><br/> histidine C<sub>6</sub>H<sub>9</sub>N<sub>3</sub>O<sub>2</sub><br/> 6-O-vanilloyl ajugol C<sub>23</sub>H<sub>30</sub>O<sub>12</sub><br/> melittoside C<sub>22</sub>H<sub>34</sub>O<sub>13</sub><br/> geniposide C<sub>17</sub>H<sub>26</sub>O<sub>10</sub></p> |
|-----------------------------|----------------------------------------------------------------------------------------------------------------------------------------------------------------------------------------------------------------------------------------------------------------------------------------------------------------------------------------------------------------------------------------------------------------------------------------------------------------------------------------------------------------------------------------------------------------------------------------------------------------------------------------------------------------------------------------------------------------------------------------------------------------------------------------------------------------------------------------------------------------------------------------------------------------------------------------------------------------------------------------------------------------------------------------------------------------------------------------------------------------------------------------------------------------------------------------------------------------------------------------------------------------------------------------------------------------------------------------------------------------------------------------------------------------------------------------------------------------------------------------------------------------------------------------------------------------------------------------------------------------------------------------------------------------------------------------------------------------------------------------------------------------------------------------------------------------------------------------------------------------------------------------------------------------------------------------------------------------------------------------------------------------------------------------------------------------------------------------------------------------------------------------------------------------------------------------------------------------------------------------------------------------------------------------------------------------------------------------------------------------------------------------------------------------------|

|                      |                                                                                                                                                                                                                                                                                                                                                                                                                                                                                                                                                                                                                                                                                                                                                                                                                                                                                                                                                                                                                                                                                                                                                                                                                                                                                                                                                                                                                                                                                                                                                                      |
|----------------------|----------------------------------------------------------------------------------------------------------------------------------------------------------------------------------------------------------------------------------------------------------------------------------------------------------------------------------------------------------------------------------------------------------------------------------------------------------------------------------------------------------------------------------------------------------------------------------------------------------------------------------------------------------------------------------------------------------------------------------------------------------------------------------------------------------------------------------------------------------------------------------------------------------------------------------------------------------------------------------------------------------------------------------------------------------------------------------------------------------------------------------------------------------------------------------------------------------------------------------------------------------------------------------------------------------------------------------------------------------------------------------------------------------------------------------------------------------------------------------------------------------------------------------------------------------------------|
| Ligusticum wallichii | <p> aucuboside / aucubin C15H22O9<br/> <math>\gamma</math>-aminobutyric acid C4H9NO2<br/> leonuride C15H24O9<br/> leonuride / ajugol C15H24O9<br/> catalpinoside C15H22O10<br/> catalpol / catalpinoside C15H22O10<br/> jioglutoside A C14H20O9<br/> D-glucose / glucose C6H12O6<br/> glucosamine C6H13NO5<br/> raffinose C18H18O7<br/> ajugoside C17H26O10<br/> jioglutoside B C23H34O13<br/> lysine C6H14N2O2<br/> tyrosine C9H11NO3<br/> adenosine / adenine nucleoside C10H13N5O4<br/> sucrose C12H22O11<br/> arginine C6H14N4O2<br/> valine C5H11NO2<br/> rehmannioside C C21H34O14<br/> rehmannioside D C27H42O20<br/> fructose C6H12O6<br/> D-glucose / glucose C6H12O6<br/> D-mannitol<br/> catalpolgenin- <math>\alpha</math>-L-arabinofuranoside<br/> trimethylamine- HCl C3H10ClN<br/> 1-acetyl- <math>\beta</math>-carboline C13H10N2O<br/> butylphthalide C12H14O2<br/> chrysophanic acid C15H12O3<br/> chrysoaphanol C15H10O4<br/> perlolyrine C16H12N2O2<br/> wallichilide C25H32O5<br/> (3S)-chunxiongol / (3S)-3-butyl-4-hydroxyphthalide C12H14O3<br/> tetramethylpyrazine / chuanxiongzine C8H12N2<br/> 3-n-butyl-3,6,7-trihydroxy-4,5,6,7-tetrahydrophthalide C12H18O5<br/> (3S)-3-butyl-4-hydroxyphthalide C12H14O3<br/> 2-(1-oxopentyl)-benzoic acid methyl ester C13H16O3<br/> 2-methoxy-4-(3-methoxy-1-propenyl)phenol C11H14O3<br/> 3-butyridenepthalide C12H12O2<br/> 3-butyridene-7-hydroxyphthalide C12H12O3<br/> linoleic acid C18H32O2<br/> <math>\beta</math>-sitosterol C29H50O<br/> uracil C4H4N2O2<br/> ferulic acid C10H10O4 </p> |
|----------------------|----------------------------------------------------------------------------------------------------------------------------------------------------------------------------------------------------------------------------------------------------------------------------------------------------------------------------------------------------------------------------------------------------------------------------------------------------------------------------------------------------------------------------------------------------------------------------------------------------------------------------------------------------------------------------------------------------------------------------------------------------------------------------------------------------------------------------------------------------------------------------------------------------------------------------------------------------------------------------------------------------------------------------------------------------------------------------------------------------------------------------------------------------------------------------------------------------------------------------------------------------------------------------------------------------------------------------------------------------------------------------------------------------------------------------------------------------------------------------------------------------------------------------------------------------------------------|

|                         |                                                                                                                                                                                                                                                                                                                                                                                                                                                                                                                                                                                                                                                                                                                                                                                                                                                                                                                                                                                                                                                                                                                                                                                                                                                                                                                                                                                                                                                                                                                                                                                                                                                                                                                                                                                                                                                                                                                                                                                                                                                                                                                                                                                                                                                                                                                                                                                                                                                                                                                                                                                                                                          |
|-------------------------|------------------------------------------------------------------------------------------------------------------------------------------------------------------------------------------------------------------------------------------------------------------------------------------------------------------------------------------------------------------------------------------------------------------------------------------------------------------------------------------------------------------------------------------------------------------------------------------------------------------------------------------------------------------------------------------------------------------------------------------------------------------------------------------------------------------------------------------------------------------------------------------------------------------------------------------------------------------------------------------------------------------------------------------------------------------------------------------------------------------------------------------------------------------------------------------------------------------------------------------------------------------------------------------------------------------------------------------------------------------------------------------------------------------------------------------------------------------------------------------------------------------------------------------------------------------------------------------------------------------------------------------------------------------------------------------------------------------------------------------------------------------------------------------------------------------------------------------------------------------------------------------------------------------------------------------------------------------------------------------------------------------------------------------------------------------------------------------------------------------------------------------------------------------------------------------------------------------------------------------------------------------------------------------------------------------------------------------------------------------------------------------------------------------------------------------------------------------------------------------------------------------------------------------------------------------------------------------------------------------------------------------|
|                         | <p> caffeic acid C<sub>9</sub>H<sub>8</sub>O<sub>4</sub><br/> vanillin C<sub>8</sub>H<sub>8</sub>O<sub>3</sub><br/> senkyunolide H C<sub>12</sub>H<sub>16</sub>O<sub>4</sub><br/> (E)-senkyunolide C<sub>12</sub>H<sub>16</sub>O<sub>2</sub><br/> senkyunolide C<sub>12</sub>H<sub>16</sub>O<sub>2</sub><br/> senkyunolide B C<sub>12</sub>H<sub>12</sub>O<sub>3</sub><br/> senkyunolide G C<sub>12</sub>H<sub>16</sub>O<sub>3</sub><br/> senkyunolide I C<sub>12</sub>H<sub>16</sub>O<sub>4</sub><br/> senkyunone C<sub>22</sub>H<sub>30</sub>O<sub>2</sub><br/> protocatechuic acid C<sub>7</sub>H<sub>6</sub>O<sub>4</sub><br/> spathulenol C<sub>15</sub>H<sub>24</sub>O<br/> 5-hydroxymethyl-6-endo-3'-methoxy-4'-hydroxyphenyl-8-oxa-bicyclo[3.2.1]-oct-3-en-2-one C<sub>16</sub>H<sub>16</sub>O<sub>5</sub><br/> 4-hydroxy-3-methoxy styrene C<sub>9</sub>H<sub>10</sub>O<sub>2</sub><br/> 1-hydroxy-1-(3-methoxy-4-hydroxyphenyl)ethane C<sub>9</sub>H<sub>12</sub>O<sub>3</sub><br/> choline chloride C<sub>5</sub>H<sub>14</sub>ClNO<br/> sedanonic acid C<sub>12</sub>H<sub>18</sub>O<sub>3</sub><br/> neocnidilide C<sub>12</sub>H<sub>18</sub>O<sub>2</sub><br/> sucrose C<sub>12</sub>H<sub>22</sub>O<sub>11</sub><br/> ligustilide C<sub>12</sub>H<sub>14</sub>O<sub>2</sub><br/> senkyunolide C C<sub>12</sub>H<sub>12</sub>O<sub>3</sub><br/> senkyunolide D C<sub>12</sub>H<sub>14</sub>O<sub>4</sub><br/> senkyunolide E C<sub>12</sub>H<sub>12</sub>O<sub>3</sub><br/> senkyunolide F C<sub>12</sub>H<sub>14</sub>O<sub>3</sub><br/> senkyunolide J C<sub>12</sub>H<sub>18</sub>O<sub>4</sub><br/> senkyunolide K C<sub>12</sub>H<sub>16</sub>O<sub>3</sub><br/> senkyunolide L C<sub>12</sub>H<sub>15</sub>ClO<sub>3</sub><br/> senkyunolide M C<sub>16</sub>H<sub>22</sub>O<sub>4</sub><br/> senkyunolide N C<sub>12</sub>H<sub>18</sub>O<sub>4</sub><br/> senkyunolide O C<sub>14</sub>H<sub>22</sub>O<sub>2</sub><br/> senkyunolide P C<sub>24</sub>H<sub>30</sub>O<sub>4</sub><br/> senkyunolide Q C<sub>16</sub>H<sub>22</sub>O<sub>4</sub><br/> perlolyrine C<sub>16</sub>H<sub>12</sub>N<sub>2</sub>O<sub>2</sub><br/> 2,3,5,6-tetramethylpyrazine C<sub>8</sub>H<sub>12</sub>N<sub>2</sub><br/> chuanxiongol C<sub>12</sub>H<sub>14</sub>O<sub>3</sub><br/> dilinoyl palmitoyl glyceride<br/> L-isoleucyl-L-valine anhydride<br/> cis-di-hydroxyligustilide<br/> trans-di-hydroxyligustilide<br/> 1-(5-hydroxymethyl-2-furyl)-9H-pyrido[3,4-b]indole<br/> 2"-O-acetylpolygalacin D C<sub>59</sub>H<sub>94</sub>O<sub>28</sub><br/> 3"-O-acetylpolygalacin D C<sub>59</sub>H<sub>94</sub>O<sub>28</sub> </p> |
| Platycodon grandiflorum |                                                                                                                                                                                                                                                                                                                                                                                                                                                                                                                                                                                                                                                                                                                                                                                                                                                                                                                                                                                                                                                                                                                                                                                                                                                                                                                                                                                                                                                                                                                                                                                                                                                                                                                                                                                                                                                                                                                                                                                                                                                                                                                                                                                                                                                                                                                                                                                                                                                                                                                                                                                                                                          |

|           |                                                                                                                                                                                                                                                                                                                                                                                                                                                                                                                                                                                                                                                                                                                                                                                                                                                                                                                                                                                                                                                                                                                                                                                                                                                                                                                                                                                                                                                                                                                                                                                                                                                                                                                                                                                                                                                                                                                                                                                                                                                                                                                                                                                                  |
|-----------|--------------------------------------------------------------------------------------------------------------------------------------------------------------------------------------------------------------------------------------------------------------------------------------------------------------------------------------------------------------------------------------------------------------------------------------------------------------------------------------------------------------------------------------------------------------------------------------------------------------------------------------------------------------------------------------------------------------------------------------------------------------------------------------------------------------------------------------------------------------------------------------------------------------------------------------------------------------------------------------------------------------------------------------------------------------------------------------------------------------------------------------------------------------------------------------------------------------------------------------------------------------------------------------------------------------------------------------------------------------------------------------------------------------------------------------------------------------------------------------------------------------------------------------------------------------------------------------------------------------------------------------------------------------------------------------------------------------------------------------------------------------------------------------------------------------------------------------------------------------------------------------------------------------------------------------------------------------------------------------------------------------------------------------------------------------------------------------------------------------------------------------------------------------------------------------------------|
| Safflower | <p> 3"-O-acetylpolygalacin D2 C65H104O33<br/> 2"-acetyl platycodin D / platycodin A C59H94O28<br/> 2"-O-acetylplatycodin D2 C65H104O34<br/> platycodin C / 3"-acetyl platycodin D C59H94O28<br/> 3"-O-acetylplatycodin D2 C65H104O34<br/> deapioplatycodin D C52H84O24<br/> 3-O- <math>\beta</math> -gentiobiosyl platycodigenin methylester C43H70O17<br/> 2-O-methyl-3-O- <math>\beta</math> -D-glucopyranosyl platycogenate A C39H62O13<br/> methyl 2-O-methylplatyconate- A C59H94O29<br/> betulin C30H50O2<br/> onjisaponin D C57H92O27<br/> polygalacin D-2 C63H102O32<br/> polygalacic acid C30H48O6<br/> stigmasta-7,22-dien-3 <math>\beta</math> -ol / chondrillasterol / bessisterol / <math>\alpha</math> -spinasterol<br/> C5H11NO2<br/> methyl 3-O- <math>\beta</math> -D-glucopyranosyl polygalacate C37H60O11<br/> 3-O- <math>\beta</math> -D-glucopyranosyl platycodigenin methyl ester C37H60O12<br/> dimethyl 3-O- <math>\beta</math> -D-glucopyranosylplatycogenate A C33H52O7<br/> 3-O- <math>\beta</math> -D-glucopyranosyl platycogenin A lactone methyl ester C37H56O12<br/> methyl 3-O- <math>\beta</math> -laminaribiosyl polygalacate C43H72O16<br/> 3-O- <math>\beta</math> -laminaribiosyl platycodigenin methylester C43H70O17<br/> platycodin D C57H92O28<br/> platycodigenin C30H48O7<br/> platyconic acid- A lactone C57H88O28<br/> methyl platyconate- A C53H84O25<br/> platycogenic acid A C30H46O8<br/> platycodin D-2 C63H102O33<br/> platycodin D-3 C63H102O33<br/> platycogenic acid B C30H46O8<br/> platycogenic acid C C30H48O6<br/> platycodin A / 2"-acetyl platycodin D C59H94O29<br/> 2"-O-acetylplatycodin D2 C65H104O33<br/> 3-O-laminaribiosylplatycodigenin methyl ester C43H72O17<br/> platycodin B C59H94O29<br/> deapioplatycodin D3 C58H94O29<br/> <math>\alpha</math> -spinasteryl- <math>\beta</math> -D-glucoside<br/> ethyl acetate C4H8O2<br/> nonacosane C29H60<br/> arachic acid / eicosanoic acid / arachidic acid C20H40O2<br/> dihydroactinidiolide C11H16O2<br/> <math>\beta</math> -caryophyllene C15H24<br/> caryophellene C15H24<br/> (Z,Z)-1,8,11-heptadecatriene C17H30<br/> (Z,Z,Z)-1,8,11,14-heptadecatetraene C17H28 </p> |
|-----------|--------------------------------------------------------------------------------------------------------------------------------------------------------------------------------------------------------------------------------------------------------------------------------------------------------------------------------------------------------------------------------------------------------------------------------------------------------------------------------------------------------------------------------------------------------------------------------------------------------------------------------------------------------------------------------------------------------------------------------------------------------------------------------------------------------------------------------------------------------------------------------------------------------------------------------------------------------------------------------------------------------------------------------------------------------------------------------------------------------------------------------------------------------------------------------------------------------------------------------------------------------------------------------------------------------------------------------------------------------------------------------------------------------------------------------------------------------------------------------------------------------------------------------------------------------------------------------------------------------------------------------------------------------------------------------------------------------------------------------------------------------------------------------------------------------------------------------------------------------------------------------------------------------------------------------------------------------------------------------------------------------------------------------------------------------------------------------------------------------------------------------------------------------------------------------------------------|

---

1-heptadecene C17H34  
1,11-tridecadiene-3,5,7,9-tetrayne C13H8  
1,3-tridecadiene-5,7,9,11-tetrayne C13H8  
1,3,11-tridecatrien-5,7,9-triayne C13H10  
1,3,5-tridecatrien-7,9,11-triayne C13H10  
1,3,5,11-tridecatetraene-7,9-diyne C13H12  
1-tridecene-3,5,7,9,11-pentayne / trideca-1-ene-3,5,7,9,11-pentayne C13H6  
1-pentadecene C15H30  
1-hexadecene C16H32  
1-tetradecene C14H28  
1,2,3-trimethoxy-5-methylbenzene C10H14O3  
(E)-2-hexenal C6H10O  
2-hexanol C6H14O  
3-hexanol C6H14O  
verbenone C10H14O  
xylose C5H10O5  
nonylaldehyde C9H18O  
D-mannose C6H12O6  
propanetriol-  $\alpha$  -arabinofuranosyl(1 $\rightarrow$ 4)-  $\beta$  -D-glucopyranoside C14H26O12  
1-pentene-3-ol / penl-en-3-ol C5H10O  
2-methyl butyric acid C5H10O2  
3-methyl butyric acid / ethyl-3-methylbutyrate C5H10O2  
deca-4,6-diyn-1-yl 3-methylbutyrate C15H22O2  
(E,Z)-2,8-decadiene-4,6-diyn-1-yl 3-methyl butyrate C15H18O2  
(Z)-8-decene-4,6-diyn-1-yl 3-methylbutyrate C15H20O2  
galactose C6H12O6  
p-xylene C8H10  
linoleic acid C18H32O2  
dopa C9H11NO4  
carthamin C43H44O21  
safflomin A C27H32O15  
 $\beta$  -sitosterol-3-O-  $\beta$  -D-glucopyranoside / daucosterol / strumaroside /  
daucosterin C35H60O6  
stigmasterol C29H48O  
 $\beta$  -sitosterol C29H50O  
eleutheroside A C35H60O6  
alexandrin C35H60O6  
o-xylene C8H10  
arabinose C5H10O5  
phenylacetaldehyde C8H8O  
benzothiazole C7H5NS  
4-terpineol C10H18O  
chlorogenic acid C16H18O9  
caffeic acid C9H8O4

---

|                     |                                                                                                                                                                                                                                                                                                                                                                                                                                                                                                                                                                                                                                                                                                                                                                                                                                                                                                                                                                                                                                                                                                                                                                                                                                                                                                                                                                                                                                                                                                                                                                                                                   |
|---------------------|-------------------------------------------------------------------------------------------------------------------------------------------------------------------------------------------------------------------------------------------------------------------------------------------------------------------------------------------------------------------------------------------------------------------------------------------------------------------------------------------------------------------------------------------------------------------------------------------------------------------------------------------------------------------------------------------------------------------------------------------------------------------------------------------------------------------------------------------------------------------------------------------------------------------------------------------------------------------------------------------------------------------------------------------------------------------------------------------------------------------------------------------------------------------------------------------------------------------------------------------------------------------------------------------------------------------------------------------------------------------------------------------------------------------------------------------------------------------------------------------------------------------------------------------------------------------------------------------------------------------|
|                     | <p> <math>\beta</math> -farnesene C15H24<br/> <math>\alpha</math> -copaene C15H24<br/> <math>\alpha</math> -cedrene C15H24<br/> cholesterol C27H44O<br/> prearthamin C21H24O11<br/> (E,E)-2,4-decadienal C10H16O<br/> decanal C10H20O<br/> methyl cinnamate C10H10O2<br/> 5'-caffeoylquinic acid C16H18O9<br/> humulene C15H24<br/> D-glucose / glucose C6H12O6<br/> <math>\beta</math> -ionone C13H20O<br/> pyrocatechol C6H6O2<br/> lysine C6H14N2O2<br/> rhamnose C6H12O5<br/> D-glucose / glucose C6H12O6<br/> decanal C10H20O<br/> xylose C5H10O5<br/> arabinose C5H10O5<br/> (Z)-1,11-tridecadiene-3,5,7,9-tetrayne C13H8<br/> (E,E,E)-1,3,5,11-tridecatetraene-7,9-diyne C13H12<br/> (Z,E,E)-1,3,5,11-tridecatetraene-7,9-diyne C13H12<br/> (Z,E)-1,3,11-tridecatriene-5,7,9-triyne C13H10<br/> (Z,Z)-1,3,11-tridecatriene-5,7,9-triyne C13H10<br/> (E,E)-1,3,5-tridecatriene-7,9,11-triyne C13H10<br/> D-mannose C6H12O6<br/> (E)-1,3-tridecadiene-5,7,9,11-tetrayne C13H8<br/> ethyl benzene C8H10<br/> 4-terpineol C10H18O<br/> dipalmitin<br/> safflow yellow A<br/> caryophyllene epoxide<br/> limonene / dipentene C10H16<br/> 3,8-di-C-glucosylapigenin C28H32O16<br/> 3,8-di-C-glucosyldiosmetin C27H32O15<br/> syringin eleutheroside B C17H24O9<br/> <math>\beta</math> -caryophyllene C15H24<br/> caryophellene C15H24<br/> 5,7,4'-trimethoxyflavone C18H16O5<br/> nobiletin C21H22O8<br/> nobiletin-3-O- <math>\beta</math> -glucoside C27H32O14<br/> 3-hydroxy-5,6,7,8,3',4'-hexamethoxyflavone-3 <math>\beta</math> -glucoside / nobiletin-3-O- <math>\beta</math> -glucoside C27H32O14 </p> |
| fructus<br>aurantii |                                                                                                                                                                                                                                                                                                                                                                                                                                                                                                                                                                                                                                                                                                                                                                                                                                                                                                                                                                                                                                                                                                                                                                                                                                                                                                                                                                                                                                                                                                                                                                                                                   |

---

lonicerin / Ionicrin C27H30O15  
2''-O-  $\beta$  -xylosylvitexin C26H28O14  
sinensetin / 5,6,7,3',4'-pentamethoxyflavone C20H20O7  
5,6,7,8,4'-pentamethoxyflavone / tangeretin C20H20O7  
5,7,8,3',4'-pentamethoxyflavone C20H20O7  
myrcene C10H16  
deacetyl nomilin C26H32O8  
deacetyl nomilinic acid C26H34O9  
dehydrodiconiferylalcohol-4-  $\beta$  -D-glucoside C26H32O11  
6-methoxyaurapten C20H24O4  
N-methyltyramine C9H13NO  
5,7,3',4'-tetramethoxyflavanone C19H18O6  
5,7,8,4'-tetramethoxyflavone C19H18O6  
eriocitrin C27H32O15  
p-cymol / p-cymene C10H14  
linoleic acid C18H32O2  
isopimpinellin C13H10O5  
isoponcimarin C19H22O5  
isolimonic acid C26H32O9  
isosakuranetin-7-rutinoside C28H34O14  
limonin C26H30O8  
synephrine C9H13NO2  
 $\gamma$  -terpinene C10H16  
 $\alpha$  -terpineol-8  $\beta$  -D-glucopyranoside C16H28O6  
coniferin C16H22O8  
imperatorin C16H14O4  
nomilin C28H34O9  
nomilinic acid C28H36O10  
ichangin C27H34O8  
citrusin II C37H44N8O7  
citrusin A C26H34O12  
citrusin B C27H36O13  
narirutin C27H32O14  
narirutin / naringenin-7-rutinoside C27H32O14  
naringin C27H32O14  
naringenin-4'-glucoside-7-rutinoside C33H42O19  
poncirin C27H32O12  
poncimarin C19H22O5  
obaculactone / limonin C25H28O8  
evodin C26H28O9  
carveol-6  $\beta$  -glucopyranoside C16H26O7  
bergapten C12H8O4  
heraclenin C16H14O5  
prangenin / heraclenin C16H16O6

---

---

prangenin hydrate C16H16O6  
obacunone C26H30O7  
rhoifolin C27H30O14  
7-geranyloxy coumarin C19H22O3  
19-hydroxydeacetylnomilinic acid-17-  $\beta$ -D-glucoside C32H46O16  
9-hydroxylinalool-9  $\beta$ -glucopyranoside C16H28O7  
aurapten C15H16O4  
 $\alpha$ -pinene C10H16  
 $\beta$ -pinene C9H14O  
vomifoliol-9-O-  $\beta$ -D-glucopyranoside C19H30O8  
neohesperidin C28H34O15  
camphene C10H16  
hesperidin C28H34O15  
hesperidin / hesperetin-7-O-rutinoside C28H34O15  
citrusin III C36H53N7O9  
citrusin IV C41H55N9O14  
citrusin C C16H22O7  
aurapten C19H22O3  
 $\gamma$ -terpinene C10H16  
 $\alpha$ -terpineol-8  $\beta$ -D-glucopyranoside C16H28O6  
5,6,7,8,4'-pentamethoxyflavone / tangeretin C20H20O7  
5,6,7,8,3',4'-hexamethoxy flavone

---
