# Supplementary material
Source: PubMed Central journal article supplement (PMC7656848)
Supplement: 41401_2019_352_MOESM2_ESM.pdf [file 41401_2019_352_MOESM2_ESM.pdf]

Supplementary Table 2 Compound in ZSXBGZ decoction.

| Traditional Chinese Medicine | Compound                                                                                                                                                                                                                                                                                                                                                                                                                                                                                                                                                                                                                                                                                                                                                                                                                                                                                                                                                                                                                                                                                                                                                                                                                                                                                                                                |
|------------------------------|-----------------------------------------------------------------------------------------------------------------------------------------------------------------------------------------------------------------------------------------------------------------------------------------------------------------------------------------------------------------------------------------------------------------------------------------------------------------------------------------------------------------------------------------------------------------------------------------------------------------------------------------------------------------------------------------------------------------------------------------------------------------------------------------------------------------------------------------------------------------------------------------------------------------------------------------------------------------------------------------------------------------------------------------------------------------------------------------------------------------------------------------------------------------------------------------------------------------------------------------------------------------------------------------------------------------------------------------|
| Fructus Aurantii Immaturus   | limonene / dipentene C10H16<br>3,8-di-C-glucosylapigenin C28H32O16<br>3,8-di-C-glucosyldiosmetin C27H32O15<br>syringin eleutheroside B C17H24O9<br>β -caryophyllene C15H24<br>caryophellene C15H24<br>5,7,4'-trimethoxyflavone C18H16O5<br>nobiletin C21H22O8<br>nobiletin-3-O- β -glucoside C27H32O14<br>3-hydroxy-5,6,7,8,3',4'-hexamethoxyflavone-3 β -glucoside / nobiletin-3-O- β -glucoside C27H32O14<br>lonicerin / lonicrin C27H30O15<br>2"-O- β -xylosylvitexin C26H28O14<br>sinensetin / 5,6,7,3',4'-pentamethoxyflavone C20H20O7<br>5,6,7,8,4'-pentamethoxyflavone / tangeretin C20H20O7<br>5,7,8,3',4'-pentamethoxyflavone C20H20O7<br>myrcene C10H16<br>deacetyl nomilin C26H32O8<br>deacetyl nomilinic acid C26H34O9<br>dehydrodiconiferylalcohol-4- β -D-glucoside C26H32O11<br>6-methoxyaurapten C20H24O4<br>N-methyltyramine C9H13NO<br>5,7,3',4'-tetramethoxyflavanone C19H18O6<br>5,7,8,4'-tetramethoxyflavone C19H18O6<br>eriocitrin C27H32O15<br>p-cymol / p-cymene C10H14<br>linoleic acid C18H32O2<br>isopimpinellin C13H10O5<br>isoponcimarin C19H22O5<br>isolimonic acid C26H32O9<br>isosakuranetin-7-rutinoside C28H34O14<br>limonin C26H30O8<br>synephrine C9H13NO2<br>γ -terpinene C10H16<br>α -terpineol-8 β -D-glucopyranoside C16H28O6<br>coniferin C16H22O8<br>imperatorin C16H14O4<br>nomilin C28H34O9 |

|                                              |                                                                                                                                                                                                                                                                                                                                                                                                                                                                                                                                                                                                                                                                                                                                                                                                                                                                                                                                                                                                                                                                                                                                                                                                                                                                                                                                                                                                                                                          |
|----------------------------------------------|----------------------------------------------------------------------------------------------------------------------------------------------------------------------------------------------------------------------------------------------------------------------------------------------------------------------------------------------------------------------------------------------------------------------------------------------------------------------------------------------------------------------------------------------------------------------------------------------------------------------------------------------------------------------------------------------------------------------------------------------------------------------------------------------------------------------------------------------------------------------------------------------------------------------------------------------------------------------------------------------------------------------------------------------------------------------------------------------------------------------------------------------------------------------------------------------------------------------------------------------------------------------------------------------------------------------------------------------------------------------------------------------------------------------------------------------------------|
| <p>Trichosanthes<br/>kirilowii<br/>Maxim</p> | <p>nomilinic acid C28H36O10<br/> ichangin C27H34O8<br/> citrusin II C37H44N8O7<br/> citrusin A C26H34O12<br/> citrusin B C27H36O13<br/> narirutin C27H32O14<br/> narirutin / naringenin-7-rutinoside C27H32O14<br/> naringin C27H32O14<br/> naringenin-4'-glucoside-7-rutinoside C33H42O19<br/> poncirin C27H32O12<br/> poncimarin C19H22O5<br/> obaculactone / limonin C25H28O8<br/> evodin C26H28O9<br/> carveol-6 β -glucopyranoside C16H26O7<br/> bergapten C12H8O4<br/> heraclenin C16H14O5<br/> prangenin / heraclenin C16H16O6<br/> prangenin hydrate C16H16O6<br/> obacunone C26H30O7<br/> rhoifolin C27H30O14<br/> 7-geranyloxycoumarin C19H22O3<br/> 19-hydroxydeacetylnomilinic acid-17- β -D-glucoside C32H46O16<br/> 9-hydroxylinalool-9 β -glucopyranoside C16H28O7<br/> aurapten C15H16O4<br/> α -pinene C10H16<br/> β -pinene C9H14O<br/> vomifoliol-9-O- β -D-glucopyranoside C19H30O8<br/> neohesperidin C28H34O15<br/> camphene C10H16<br/> hesperidin C28H34O15<br/> hesperidin / hesperetin-7-O-rutinoside C28H34O15<br/> citrusin III C36H53N7O9<br/> citrusin IV C41H55N9O14<br/> citrusin C C16H22O7<br/> aurapten C19H22O3<br/> γ -terpinene C10H16<br/> α -terpineol-8 β -D-glucopyranoside C16H28O6<br/> 5,6,7,8,4'-pentamethoxyflavone / tangeretin C20H20O7<br/> 5,6,7,8,3',4'-hexamethoxy flavone<br/> aspartate / asparagic acid / asparaginic acid / aspartic acid C4H7NO4<br/> glycine C2H5NO2<br/> alanine C3H7NO2</p> |
|----------------------------------------------|----------------------------------------------------------------------------------------------------------------------------------------------------------------------------------------------------------------------------------------------------------------------------------------------------------------------------------------------------------------------------------------------------------------------------------------------------------------------------------------------------------------------------------------------------------------------------------------------------------------------------------------------------------------------------------------------------------------------------------------------------------------------------------------------------------------------------------------------------------------------------------------------------------------------------------------------------------------------------------------------------------------------------------------------------------------------------------------------------------------------------------------------------------------------------------------------------------------------------------------------------------------------------------------------------------------------------------------------------------------------------------------------------------------------------------------------------------|

|             |                                                                           |
|-------------|---------------------------------------------------------------------------|
|             | methionine C <sub>5</sub> H <sub>11</sub> NO <sub>2</sub> S               |
|             | cysteine C <sub>2</sub> SH <sub>2</sub> O <sub>6</sub>                    |
|             | serine C <sub>3</sub> H <sub>7</sub> NO <sub>3</sub>                      |
|             | tryptophane C <sub>11</sub> H <sub>12</sub> N <sub>2</sub> O <sub>2</sub> |
|             | isoleucine C <sub>6</sub> H <sub>13</sub> NO <sub>2</sub>                 |
|             | threonine C <sub>4</sub> H <sub>9</sub> NO <sub>3</sub>                   |
|             | glutamic acid C <sub>5</sub> H <sub>9</sub> NO <sub>4</sub>               |
|             | phenylalanine C <sub>9</sub> H <sub>11</sub> NO <sub>2</sub>              |
|             | histidine C <sub>6</sub> H <sub>9</sub> N <sub>3</sub> O <sub>2</sub>     |
|             | leucine C <sub>6</sub> H <sub>13</sub> NO <sub>2</sub>                    |
|             | proline C <sub>5</sub> H <sub>9</sub> NO <sub>2</sub>                     |
|             | lysine C <sub>6</sub> H <sub>14</sub> N <sub>2</sub> O <sub>2</sub>       |
|             | tyrosine C <sub>9</sub> H <sub>11</sub> NO <sub>3</sub>                   |
|             | arginine C <sub>6</sub> H <sub>14</sub> N <sub>4</sub> O <sub>2</sub>     |
|             | valine C <sub>5</sub> H <sub>11</sub> NO <sub>2</sub>                     |
|             | Karounidiol 3-benzoate                                                    |
|             | Trichosanatine                                                            |
|             | Trichosanic acid                                                          |
|             | 7-Oxoisomultiflorenol                                                     |
|             | 5 α -Stigmastane-3 β ,6 α -diol                                           |
|             | γ -Aminobutyric acid                                                      |
|             | CucurbitacinJ2-O- β -glucopyranoside                                      |
|             | Cyclotricuspidoside A                                                     |
|             | Cyclotricuspidoside B                                                     |
|             | Cyclotricuspidoside C                                                     |
|             | (25R)-Samogenin3-O- β -D-glucopyranosyl(1->2)- β -D-ga...                 |
|             | (25S)-Samogenin3-O- β -D-glucopyranosyl(1->2)- β -D-ga...                 |
|             | CucurbitacinK2-O- β -glucopyranoside                                      |
|             | 3-Epibryonolol                                                            |
|             | 3-Epikarounidiol                                                          |
|             | Vomifoliol                                                                |
|             | 7-Oxodihydro karounidiol                                                  |
|             | Bryonolic acid                                                            |
|             | Karounidiol                                                               |
|             | 7-Stigmastenol-3-O- β -D-glucoside                                        |
|             | 7-Stigmastene-3                                                           |
|             | 3,29-O-Dibenzoyloxykarounidiol                                            |
|             | Hexadecanoicacid                                                          |
|             | 11-Methoxynoryangonin                                                     |
|             | Khekadaengoside C                                                         |
| Allium      | dipropyl disulfide C <sub>6</sub> H <sub>14</sub> S <sub>2</sub>          |
| Macrostemon |                                                                           |
| Bunge       | dipropyl trisulfide C <sub>6</sub> H <sub>14</sub> S <sub>3</sub>         |

---

dimethyl disulfide C<sub>2</sub>H<sub>6</sub>S<sub>2</sub>  
dimethyl trisulfide C<sub>2</sub>H<sub>6</sub>S<sub>3</sub>  
3,5-dimethyl-1,2,4-trithiane C<sub>5</sub>H<sub>10</sub>S<sub>3</sub>  
3,3-dimethylpentane C<sub>7</sub>H<sub>16</sub>  
dimethyl tetrasulfide C<sub>2</sub>H<sub>6</sub>S<sub>4</sub>  
2,4-dimethyl thiophene C<sub>6</sub>H<sub>8</sub>S  
1,2-dimethylthioethylene C<sub>4</sub>H<sub>8</sub>S<sub>2</sub>  
diallyl disulphide / diallyl disulfide / allyl disulfide C<sub>6</sub>H<sub>10</sub>S<sub>2</sub>  
1,3-dithiane C<sub>4</sub>H<sub>8</sub>S<sub>2</sub>  
succinic acid C<sub>4</sub>H<sub>6</sub>O<sub>4</sub>  
daturic acid / heptadecanoic acid / margaric acid C<sub>17</sub>H<sub>34</sub>O<sub>2</sub>  
heptadecenoic acid C<sub>17</sub>H<sub>30</sub>  
9,12-octadecadienoic acid C<sub>18</sub>H<sub>32</sub>O<sub>2</sub>  
pentadecanoic acid C<sub>15</sub>H<sub>30</sub>O<sub>2</sub>  
hexadecenoic acid C<sub>16</sub>H<sub>30</sub>O<sub>2</sub>  
2,2-bis(methylthio)propane C<sub>5</sub>H<sub>12</sub>S<sub>2</sub>  
n-propylmethyl trisulfide C<sub>4</sub>H<sub>10</sub>S<sub>3</sub>  
n-heptane C<sub>7</sub>H<sub>16</sub>  
propylisopropyl disulfide C<sub>6</sub>H<sub>14</sub>S<sub>2</sub>  
3-[(1-methyl ethyl)thiol]-1-propene C<sub>6</sub>H<sub>12</sub>S  
21-methyl tricosanoic acid C<sub>24</sub>H<sub>48</sub>O<sub>2</sub>  
4-methyl-1,2,3-trithiane C<sub>4</sub>H<sub>8</sub>S<sub>3</sub>  
3-methylhexane C<sub>7</sub>H<sub>16</sub>  
methyl propyl disulfide C<sub>4</sub>H<sub>10</sub>S<sub>2</sub>  
methyl propyl trisulfide C<sub>4</sub>H<sub>10</sub>S<sub>3</sub>  
methyl(1-propenyl)-disulfide C<sub>4</sub>H<sub>8</sub>S<sub>2</sub>  
2-methyl-2-pentenal C<sub>6</sub>H<sub>10</sub>O  
5-methyl-1,2,3,4-tetrathiane C<sub>3</sub>H<sub>6</sub>S<sub>4</sub>  
methylcyclohexane C<sub>7</sub>H<sub>14</sub>  
methyl allyl disulfide C<sub>4</sub>H<sub>8</sub>S<sub>2</sub>  
methyl allyl trisulfide C<sub>4</sub>H<sub>8</sub>S<sub>3</sub>  
lunularic acid C<sub>15</sub>H<sub>14</sub>O<sub>4</sub>  
N-(p-trans-coumaroyl)tyramine C<sub>17</sub>H<sub>17</sub>NO<sub>3</sub>  
p-coumaric acid C<sub>9</sub>H<sub>8</sub>O<sub>3</sub>  
p-coumaric acid / 4-hydroxycinnamic acid C<sub>9</sub>H<sub>8</sub>O<sub>3</sub>  
N-(p-cis-coumaroyl)tyramine C<sub>17</sub>H<sub>17</sub>NO<sub>3</sub>  
p-hydroxybenzoic acid C<sub>7</sub>H<sub>6</sub>O<sub>3</sub>  
linoleic acid C<sub>18</sub>H<sub>32</sub>O<sub>2</sub>  
isopropylallyl disulfide C<sub>6</sub>H<sub>12</sub>S<sub>2</sub>  
smilagenin-3-O- β -D-glucopyranosyl(1 → 2)- β -D-galactopyranoside  
C<sub>40</sub>H<sub>66</sub>O<sub>12</sub>  
β -sitosterol-3-O- β -D-glucopyranoside / daucosterol / strumaroside /  
daucosterin C<sub>35</sub>H<sub>60</sub>O<sub>6</sub>  
eleutheroside A C<sub>35</sub>H<sub>60</sub>O<sub>6</sub>

---

|                         |                                                                                                                                                                                                                                                                                                                                                                                                                                                                                                                                                                                                                                                                                                                                                                                                                                                                                                                                                                                                                                                  |
|-------------------------|--------------------------------------------------------------------------------------------------------------------------------------------------------------------------------------------------------------------------------------------------------------------------------------------------------------------------------------------------------------------------------------------------------------------------------------------------------------------------------------------------------------------------------------------------------------------------------------------------------------------------------------------------------------------------------------------------------------------------------------------------------------------------------------------------------------------------------------------------------------------------------------------------------------------------------------------------------------------------------------------------------------------------------------------------|
| Mangolia<br>officinalis | alexandrin C35H60O6<br>N-ferulosyl tyramine C18H19NO4<br>chinenoside I C46H74O23<br>prostaglandin A1 C20H32O4<br>adenosine / adenine nucleoside C10H13N5O4<br>macrostemonoside A C51H84O23<br>prostaglandin B1 C20H32O4<br>macrostemonoside D C53H86O24<br>macrostemonoside E C57H94O28<br>macrostemonoside F C45H74O18<br>n-propylallyl disulfide<br>3-[(1-methyl ethyl)thiol]-1-propene<br>macrostemonoside B<br>macrostemonoside C<br>Magnolol<br><br>Honokiol<br>Magnocurarine<br>Obovatol<br>Magnotriol B<br>Magnotriol A<br>N-Acetylxylopine<br>N-Acetylanonaine<br>1,1'-Dibenzene-6',8',9'-trihydroxy-3-allyl-4-O- β -D...<br>N-Formylanonaine<br>Clovanemagnolol<br>Caryolanemagnolol<br>Eudesobovatol A<br>1-(4-Hydroxy-3-methoxyphenyl)-2-[4-(omega-hydroxypr...<br>Asimilobine<br>Monoterpenylmagnolol<br>(-)-Anonaine<br>Randaiol<br>Piperitylmagnolol<br>Piperitylhonokiol<br>Magnolignan I<br>Magnolignan H<br>Magnolignan G<br>Magnolignan F<br>Magnolignan E<br>Magnolignan D<br>Magnolignan C<br>Magnolignan B<br>Magnolignan A |
|-------------------------|--------------------------------------------------------------------------------------------------------------------------------------------------------------------------------------------------------------------------------------------------------------------------------------------------------------------------------------------------------------------------------------------------------------------------------------------------------------------------------------------------------------------------------------------------------------------------------------------------------------------------------------------------------------------------------------------------------------------------------------------------------------------------------------------------------------------------------------------------------------------------------------------------------------------------------------------------------------------------------------------------------------------------------------------------|

---

|             |                                                                                                                                                                                                                                                                                                                                                                                                                                                                                                                                                                                                                             |
|-------------|-----------------------------------------------------------------------------------------------------------------------------------------------------------------------------------------------------------------------------------------------------------------------------------------------------------------------------------------------------------------------------------------------------------------------------------------------------------------------------------------------------------------------------------------------------------------------------------------------------------------------------|
| Cassia twig | Magnatriol B<br>Magnaldehyde E<br>Magnaldehyde D<br>Magnaldehyde C<br>Magnaldehyde B<br>6'-O-Methylhonokiol<br>Isomagnolol<br>Dipiperitylmagnolol<br>Bornul magnolol<br>cinnamyl acetate C <sub>11</sub> H <sub>12</sub> O <sub>2</sub><br>benzyl benzoate / phenylmethylbenzoate C <sub>14</sub> H <sub>12</sub> O <sub>2</sub><br>coumarin C <sub>9</sub> H <sub>6</sub> O <sub>2</sub><br>cinnamaldehyde / cinnamic aldehyde C <sub>9</sub> H <sub>8</sub> O<br>calamenene C <sub>15</sub> H <sub>22</sub><br>calamenene C <sub>15</sub> H <sub>22</sub><br>β-cadinene<br>Anhydrocinnzeylanol<br>2-Methoxycinnamaldehyde |
|-------------|-----------------------------------------------------------------------------------------------------------------------------------------------------------------------------------------------------------------------------------------------------------------------------------------------------------------------------------------------------------------------------------------------------------------------------------------------------------------------------------------------------------------------------------------------------------------------------------------------------------------------------|

---
