# Supplementary material
Source: PubMed Central journal article supplement (PMC7656848)
Supplement: 41401_2019_352_MOESM3_ESM.pdf [file 41401_2019_352_MOESM3_ESM.pdf]

Table 3 Compound in GLXBBX decoction

| Traditional Chinese Medicine   | Compound                                                                                                                                                                                                                                                                                                                                                                                                                                                                                                                                                                                                                                                                                                                                                                                                                                                                                                                                                                                                                                                                                                                                                                                                                                                                                                                                                                                                                                                                                                                                                                                                                                                                                                                                                                                                                                                                                                                                                                                                                                                                                                                                                                                                                                                                                                                                                                                                                                                                                                                                                                                                                                                                                                                                                                     |
|--------------------------------|------------------------------------------------------------------------------------------------------------------------------------------------------------------------------------------------------------------------------------------------------------------------------------------------------------------------------------------------------------------------------------------------------------------------------------------------------------------------------------------------------------------------------------------------------------------------------------------------------------------------------------------------------------------------------------------------------------------------------------------------------------------------------------------------------------------------------------------------------------------------------------------------------------------------------------------------------------------------------------------------------------------------------------------------------------------------------------------------------------------------------------------------------------------------------------------------------------------------------------------------------------------------------------------------------------------------------------------------------------------------------------------------------------------------------------------------------------------------------------------------------------------------------------------------------------------------------------------------------------------------------------------------------------------------------------------------------------------------------------------------------------------------------------------------------------------------------------------------------------------------------------------------------------------------------------------------------------------------------------------------------------------------------------------------------------------------------------------------------------------------------------------------------------------------------------------------------------------------------------------------------------------------------------------------------------------------------------------------------------------------------------------------------------------------------------------------------------------------------------------------------------------------------------------------------------------------------------------------------------------------------------------------------------------------------------------------------------------------------------------------------------------------------|
| Allium<br>Macrostemon<br>Bunge | dipropyl disulfide C <sub>6</sub> H <sub>14</sub> S <sub>2</sub><br>dipropyl trisulfide C <sub>6</sub> H <sub>14</sub> S <sub>3</sub><br>dimethyl disulfide C <sub>2</sub> H <sub>6</sub> S <sub>2</sub><br>dimethyl trisulfide C <sub>2</sub> H <sub>6</sub> S <sub>3</sub><br>3,5-dimethyl-1,2,4-trithiane C <sub>5</sub> H <sub>10</sub> S <sub>3</sub><br>3,3-dimethylpentane C <sub>7</sub> H <sub>16</sub><br>dimethyl tetrasulfide C <sub>2</sub> H <sub>6</sub> S <sub>4</sub><br>2,4-dimethyl thiophene C <sub>6</sub> H <sub>8</sub> S<br>1,2-dimethylthioethylene C <sub>4</sub> H <sub>8</sub> S <sub>2</sub><br>diallyl disulphide / diallyl disulfide / allyl disulfide C <sub>6</sub> H <sub>10</sub> S <sub>2</sub><br>1,3-dithiane C <sub>4</sub> H <sub>8</sub> S <sub>2</sub><br>succinic acid C <sub>4</sub> H <sub>6</sub> O <sub>4</sub><br>daturic acid / heptadecanoic acid / margaric acid C <sub>17</sub> H <sub>34</sub> O <sub>2</sub><br>heptadecenoic acid C <sub>17</sub> H <sub>30</sub><br>9,12-octadecadienoic acid C <sub>18</sub> H <sub>32</sub> O <sub>2</sub><br>pentadecanoic acid C <sub>15</sub> H <sub>30</sub> O <sub>2</sub><br>hexadecenoic acid C <sub>16</sub> H <sub>30</sub> O <sub>2</sub><br>2,2-bis(methylthio)propane C <sub>5</sub> H <sub>12</sub> S <sub>2</sub><br>n-propylmethyl trisulfide C <sub>4</sub> H <sub>10</sub> S <sub>3</sub><br>n-heptane C <sub>7</sub> H <sub>16</sub><br>propylisopropyl disulfide C <sub>6</sub> H <sub>14</sub> S <sub>2</sub><br>3-[(1-methyl ethyl)thiol]-1-propene C <sub>6</sub> H <sub>12</sub> S<br>21-methyl tricosanoic acid C <sub>24</sub> H <sub>48</sub> O <sub>2</sub><br>4-methyl-1,2,3-trithiane C <sub>4</sub> H <sub>8</sub> S <sub>3</sub><br>3-methylhexane C <sub>7</sub> H <sub>16</sub><br>methyl propyl disulfide C <sub>4</sub> H <sub>10</sub> S <sub>2</sub><br>methyl propyl trisulfide C <sub>4</sub> H <sub>10</sub> S <sub>3</sub><br>methyl(1-propenyl)-disulfide C <sub>4</sub> H <sub>8</sub> S <sub>2</sub><br>2-methyl-2-pentenal C <sub>6</sub> H <sub>10</sub> O<br>5-methyl-1,2,3,4-tetrathiane C <sub>3</sub> H <sub>6</sub> S <sub>4</sub><br>methylcyclohexane C <sub>7</sub> H <sub>14</sub><br>methyl allyl disulfide C <sub>4</sub> H <sub>8</sub> S <sub>2</sub><br>methyl allyl trisulfide C <sub>4</sub> H <sub>8</sub> S <sub>3</sub><br>lunularic acid C <sub>15</sub> H <sub>14</sub> O <sub>4</sub><br>N-(p-trans-coumaroyl)tyramine C <sub>17</sub> H <sub>17</sub> NO <sub>3</sub><br>p-coumaric acid C <sub>9</sub> H <sub>8</sub> O <sub>3</sub><br>p-coumaric acid / 4-hydroxycinnamic acid C <sub>9</sub> H <sub>8</sub> O <sub>3</sub><br>N-(p-cis-coumaroyl)tyramine C <sub>17</sub> H <sub>17</sub> NO <sub>3</sub> |

|                     |                                                                                                                                                                                                                                                                                                                                                                                                                                                                                                                                                                                                                                                                                                                                                                                                                                                                                                                                                                                                                                                                                                                                                                                                                                                                                                                                                                                                                                                                                                    |
|---------------------|----------------------------------------------------------------------------------------------------------------------------------------------------------------------------------------------------------------------------------------------------------------------------------------------------------------------------------------------------------------------------------------------------------------------------------------------------------------------------------------------------------------------------------------------------------------------------------------------------------------------------------------------------------------------------------------------------------------------------------------------------------------------------------------------------------------------------------------------------------------------------------------------------------------------------------------------------------------------------------------------------------------------------------------------------------------------------------------------------------------------------------------------------------------------------------------------------------------------------------------------------------------------------------------------------------------------------------------------------------------------------------------------------------------------------------------------------------------------------------------------------|
| Pinellia<br>ternata | p-hydroxybenzoic acid C7H6O3<br>linoleic acid C18H32O2<br>isopropylallyl disulfide C6H12S2<br>smilagenin-3-O-β-D-glucopyranosyl(1→2)-β-D-galactopyranoside C40H66O12<br>β-sitosterol-3-O-β-D-glucopyranoside / daucosterol / strumaroside / daucosterin C35H60O6<br>eleutheroside A C35H60O6<br>alexandrin C35H60O6<br>N-ferulosyl tyramine C18H19NO4<br>chinenoside I C46H74O23<br>prostaglandin A1 C20H32O4<br>adenosine / adenine nucleoside C10H13N5O4<br>macrostemonoside A C51H84O23<br>prostaglandin B1 C20H32O4<br>macrostemonoside D C53H86O24<br>macrostemonoside E C57H94O28<br>macrostemonoside F C45H74O18<br>n-propylallyl disulfide<br>3-[(1-methyl ethyl)thiol]-1-propene<br>macrostemonoside B<br>macrostemonoside C<br>gingerol C21H34O4R<br><br>3-acetamino-5-methyl isooxazole C6H8N2O2<br>3,4-dihydroxybenzaldehyde / protocatechualdehyde C7H6O3<br>butylethylene ether C6H12O<br>2-undecanone C11H22O<br>9-heptadecanol C17H36O<br>aspartate / asparagic acid / asparaginic acid / aspartic acid C4H7NO4<br>1,2,3,4,6-penta-O-galloyl-β-D-glucose C41H32O26<br>1,5-pentadiol C5H12O2<br>pentaldehyde oxime C5H11NO<br>3-methyleicosane C21H44<br>2-methylpyrazine C5H6N2<br>β-sitosterol-3-O-β-D-glucopyranoside / daucosterol / strumaroside / daucosterin C35H60O6<br>eleutheroside A C35H60O6<br>alexandrin C35H60O6<br>1-octene C8H16<br>homogentisic acid C8H8O4<br>12,13-epoxy-9-hydroxynonadeca-7,10-dienoic acid C18H30O4<br>benzaldehyde C7H6O<br>anethole C10H12O |
|---------------------|----------------------------------------------------------------------------------------------------------------------------------------------------------------------------------------------------------------------------------------------------------------------------------------------------------------------------------------------------------------------------------------------------------------------------------------------------------------------------------------------------------------------------------------------------------------------------------------------------------------------------------------------------------------------------------------------------------------------------------------------------------------------------------------------------------------------------------------------------------------------------------------------------------------------------------------------------------------------------------------------------------------------------------------------------------------------------------------------------------------------------------------------------------------------------------------------------------------------------------------------------------------------------------------------------------------------------------------------------------------------------------------------------------------------------------------------------------------------------------------------------|

|                                      |                                                                                                                                                                                                                                                                                                                                                                                                                                                                                                                                                                                                                                                                                                                                                                                                                                                                                                                                                                                                                                                                                                                                                                                                                                                                                                                                              |
|--------------------------------------|----------------------------------------------------------------------------------------------------------------------------------------------------------------------------------------------------------------------------------------------------------------------------------------------------------------------------------------------------------------------------------------------------------------------------------------------------------------------------------------------------------------------------------------------------------------------------------------------------------------------------------------------------------------------------------------------------------------------------------------------------------------------------------------------------------------------------------------------------------------------------------------------------------------------------------------------------------------------------------------------------------------------------------------------------------------------------------------------------------------------------------------------------------------------------------------------------------------------------------------------------------------------------------------------------------------------------------------------|
| <p>Trichosanthes kirilowii Maxim</p> | <p> citral C10H16O<br/> choline C5H15NO2<br/> shogaol C17H24O3<br/> <math>\alpha</math>-aminobutyric acid C4H9NO2<br/> 2-aminobutyric acid C4H9NO2<br/> <math>\beta</math>-aminobutyric acid C4H9NO2<br/> baicalin C21H18O11<br/> baicalein C22H20O11<br/> ephedrine C10H15NO<br/> ethyl palmitate C18H36O2<br/> methyl-2-chloropropenoate C4H5ClO2<br/> <math>\beta</math>-elemene C15H24<br/> methyl 2-chloropropenoate C4H5ClO2<br/> hexadecylendioic acid<br/> aspartate / asparagic acid / asparaginic acid / aspartic acid C4H7NO4<br/> <br/> glycine C2H5NO2<br/> alanine C3H7NO2<br/> methionine C5H11NO2S<br/> cysteine C25H22O6<br/> serine C3H7NO3<br/> tryptophane C11H12N2O2<br/> isoleucine C6H13NO2<br/> threonine C4H9NO3<br/> glutamic acid C5H9NO4<br/> phenylalanine C9H11NO2<br/> histidine C6H9N3O2<br/> leucine C6H13NO2<br/> proline C5H9NO2<br/> lysine C6H14N2O2<br/> tyrosine C9H11NO3<br/> arginine C6H14N4O2<br/> valine C5H11NO2<br/> Karounidiol 3-benzoate<br/> Trichosanatine<br/> Trichosanic acid<br/> 7-Oxoisomultiflorenol<br/> 5<math>\alpha</math>-Stigmastane-3<math>\beta</math>,6<math>\alpha</math>-diol<br/> <math>\gamma</math>-Aminobutyric acid<br/> CucurbitacinJ2-O-<math>\beta</math>-glucopyranoside<br/> Cyclotricuspidoside A<br/> Cyclotricuspidoside B<br/> Cyclotricuspidoside C </p> |
|--------------------------------------|----------------------------------------------------------------------------------------------------------------------------------------------------------------------------------------------------------------------------------------------------------------------------------------------------------------------------------------------------------------------------------------------------------------------------------------------------------------------------------------------------------------------------------------------------------------------------------------------------------------------------------------------------------------------------------------------------------------------------------------------------------------------------------------------------------------------------------------------------------------------------------------------------------------------------------------------------------------------------------------------------------------------------------------------------------------------------------------------------------------------------------------------------------------------------------------------------------------------------------------------------------------------------------------------------------------------------------------------|

|        |                                                                                                                                                                                                                                                                                                                                                                                                                                                                                                                                                                                                                                                                                                                                                                                                                                                                                                                                                                                                                                                                                                                                                                                                                                                                                                                                                                                                                                                                                                                                                                                                                                                                                                                                                                                                                                                                                                                                                                                                                                                                                                                                                                                                                                                                                                           |
|--------|-----------------------------------------------------------------------------------------------------------------------------------------------------------------------------------------------------------------------------------------------------------------------------------------------------------------------------------------------------------------------------------------------------------------------------------------------------------------------------------------------------------------------------------------------------------------------------------------------------------------------------------------------------------------------------------------------------------------------------------------------------------------------------------------------------------------------------------------------------------------------------------------------------------------------------------------------------------------------------------------------------------------------------------------------------------------------------------------------------------------------------------------------------------------------------------------------------------------------------------------------------------------------------------------------------------------------------------------------------------------------------------------------------------------------------------------------------------------------------------------------------------------------------------------------------------------------------------------------------------------------------------------------------------------------------------------------------------------------------------------------------------------------------------------------------------------------------------------------------------------------------------------------------------------------------------------------------------------------------------------------------------------------------------------------------------------------------------------------------------------------------------------------------------------------------------------------------------------------------------------------------------------------------------------------------------|
| liquor | <p>(25R)-Samogenin3-O-β-D-glucopyranosyl(1-&gt;2)-β-D-ga...<br/> (25S)-Samogenin3-O-β-D-glucopyranosyl(1-&gt;2)-β-D-ga...<br/> CucurbitacinK2-O-β-glucopyranoside<br/> 3-Epibryonolol<br/> 3-Epikarounidiol<br/> Vomifoliol<br/> 7-Oxodihydro karounidiol<br/> Bryonolic acid<br/> Karounidiol<br/> 7-Stigmastenol-3-O-β-D-glucoside<br/> 7-Stigmastene-3<br/> 3,29-O-Dibenzoyloxykarounidiol<br/> Hexadecanoic acid<br/> 11-Methoxynoryangonin<br/> Khekadaengoside C<br/> acetic acid C<sub>2</sub>H<sub>4</sub>O<sub>2</sub><br/> ethyl acetate C<sub>4</sub>H<sub>8</sub>O<sub>2</sub><br/> amyl acetate C<sub>7</sub>H<sub>14</sub>O<sub>2</sub><br/> ethanol / ethyl alcohol C<sub>2</sub>H<sub>6</sub>O<br/> succinic acid C<sub>4</sub>H<sub>6</sub>O<sub>4</sub><br/> ethyl butyrate C<sub>6</sub>H<sub>12</sub>O<sub>2</sub><br/> butanoic acid / butyric acid C<sub>4</sub>H<sub>8</sub>O<sub>2</sub><br/> amyl butyrate C<sub>9</sub>H<sub>18</sub>O<sub>2</sub><br/> butanol C<sub>4</sub>H<sub>10</sub>O<br/> guercetol / quercetin C<sub>15</sub>H<sub>10</sub>O<sub>7</sub><br/> caproic acid C<sub>6</sub>H<sub>12</sub>O<sub>2</sub><br/> pelargonic acid C<sub>9</sub>H<sub>18</sub>O<sub>2</sub><br/> glycerin C<sub>3</sub>H<sub>8</sub>O<sub>3</sub><br/> valeric acid C<sub>5</sub>H<sub>10</sub>O<sub>2</sub><br/> amylalcohol / pentanol C<sub>5</sub>H<sub>12</sub>O<br/> formic acid CH<sub>2</sub>O<sub>2</sub><br/> caprylic acid C<sub>8</sub>H<sub>16</sub>O<sub>2</sub><br/> decanoic acid / capric acid C<sub>10</sub>H<sub>20</sub>O<sub>2</sub><br/> maltose C<sub>12</sub>H<sub>22</sub>O<sub>11</sub><br/> malic acid C<sub>4</sub>H<sub>6</sub>O<sub>5</sub><br/> lactic acid / lactate C<sub>3</sub>H<sub>6</sub>O<sub>3</sub><br/> tartaric acid C<sub>4</sub>H<sub>6</sub>O<sub>6</sub><br/> D-glucose / glucose C<sub>6</sub>H<sub>12</sub>O<sub>6</sub><br/> malvidin C<sub>17</sub>H<sub>17</sub>ClO<sub>7</sub><br/> oenin / malvidin-3-glucoside C<sub>21</sub>H<sub>23</sub>O<sub>12</sub><br/> dextrin / amylin C<sub>20</sub>H<sub>23</sub>N<br/> tannic acid C<sub>76</sub>H<sub>52</sub>O<sub>46</sub><br/> D-glucose / glucose C<sub>6</sub>H<sub>12</sub>O<sub>6</sub><br/> butanoic acid / butyric acid C<sub>4</sub>H<sub>8</sub>O<sub>2</sub></p> |
|--------|-----------------------------------------------------------------------------------------------------------------------------------------------------------------------------------------------------------------------------------------------------------------------------------------------------------------------------------------------------------------------------------------------------------------------------------------------------------------------------------------------------------------------------------------------------------------------------------------------------------------------------------------------------------------------------------------------------------------------------------------------------------------------------------------------------------------------------------------------------------------------------------------------------------------------------------------------------------------------------------------------------------------------------------------------------------------------------------------------------------------------------------------------------------------------------------------------------------------------------------------------------------------------------------------------------------------------------------------------------------------------------------------------------------------------------------------------------------------------------------------------------------------------------------------------------------------------------------------------------------------------------------------------------------------------------------------------------------------------------------------------------------------------------------------------------------------------------------------------------------------------------------------------------------------------------------------------------------------------------------------------------------------------------------------------------------------------------------------------------------------------------------------------------------------------------------------------------------------------------------------------------------------------------------------------------------|

---

|                                                                                                                                                                                                                   |
|-------------------------------------------------------------------------------------------------------------------------------------------------------------------------------------------------------------------|
| maltose C <sub>12</sub> H <sub>22</sub> O <sub>11</sub><br>D-glucose / glucose C <sub>6</sub> H <sub>12</sub> O <sub>6</sub><br>quercetol / querceton C <sub>30</sub> H <sub>26</sub> O <sub>15</sub><br>propanol |
|-------------------------------------------------------------------------------------------------------------------------------------------------------------------------------------------------------------------|

---
