# Supplementary material
Source: PubMed Central journal article supplement (PMC7656848)
Supplement: 41401_2019_352_MOESM4_ESM.pdf [file 41401_2019_352_MOESM4_ESM.pdf]

Supplementary Table 4: The related molecular of GLXBBX decoction.

| OFFICIAL_GENE_SYMBOL | Name                                                               |
|----------------------|--------------------------------------------------------------------|
| PEX11A               | peroxisomal biogenesis factor 11 alpha(PEX11A)                     |
| SUCLG2               | succinate-CoA ligase GDP-forming beta subunit(SUCLG2)              |
| HIBCH                | 3-hydroxyisobutyryl-CoA hydrolase(HIBCH)                           |
| SUCLG1               | succinate-CoA ligase alpha subunit(SUCLG1)                         |
| SUCLA2               | succinate-CoA ligase ADP-forming beta subunit(SUCLA2)              |
| PLA2G2D              | phospholipase A2 group IID(PLA2G2D)                                |
| GALR2                | galanin receptor 2(GALR2)                                          |
| AARS                 | alanyl-tRNA synthetase(AARS)                                       |
| SAP30                | Sin3A associated protein 30(SAP30)                                 |
| ABCA1                | ATP binding cassette subfamily A member 1(ABCA1)                   |
| DPM2                 | dolichyl-phosphate mannosyltransferase subunit 2, regulatory(DPM2) |
| ABAT                 | 4-aminobutyrate aminotransferase(ABAT)                             |
| CES2                 | carboxylesterase 2(CES2)                                           |
| GK5                  | glycerol kinase 5 (putative)(GK5)                                  |
| ACACA                | acetyl-CoA carboxylase alpha(ACACA)                                |
| ACAA1                | acetyl-CoA acyltransferase 1(ACAA1)                                |
| ACADM                | acyl-CoA dehydrogenase, C-4 to C-12 straight chain(ACADM)          |
| ACACB                | acetyl-CoA carboxylase beta(ACACB)                                 |
| ACAT1                | acetyl-CoA acetyltransferase 1(ACAT1)                              |
| RTN4R                | reticulon 4 receptor(RTN4R)                                        |
| SLC5A8               | solute carrier family 5 member 8(SLC5A8)                           |
| ACHE                 | acetylcholinesterase (Cartwright blood group)(ACHE)                |
| NPS                  | neuropeptide S(NPS)                                                |
| LTB4R2               | leukotriene B4 receptor 2(LTB4R2)                                  |
| ACLY                 | ATP citrate lyase(ACLY)                                            |
| MPO                  | myeloperoxidase(MPO)                                               |
| ACO1                 | aconitase 1(ACO1)                                                  |
| ABCC1                | ATP binding cassette subfamily C member 1(ABCC1)                   |
| ACTN2                | actinin alpha 2(ACTN2)                                             |
| ADA                  | adenosine deaminase(ADA)                                           |
| ACYP2                | acylphosphatase 2(ACYP2)                                           |
| B4GALT2              | beta-1,4-galactosyltransferase 2(B4GALT2)                          |
| ADCY5                | adenylate cyclase 5(ADCY5)                                         |
| ADCY2                | adenylate cyclase 2(ADCY2)                                         |
| ADCY3                | adenylate cyclase 3(ADCY3)                                         |
| ADCY1                | adenylate cyclase 1(ADCY1)                                         |
| ADCYAP1R1            | ADCYAP receptor type I(ADCYAP1R1)                                  |
| ADCYAP1              | adenylate cyclase activating polypeptide 1(ADCYAP1)                |
| ADCY9                | adenylate cyclase 9(ADCY9)                                         |
| ADCY8                | adenylate cyclase 8(ADCY8)                                         |

|         |                                                                                                            |
|---------|------------------------------------------------------------------------------------------------------------|
| ADCY7   | adenylate cyclase 7(ADCY7)                                                                                 |
| ADCY6   | adenylate cyclase 6(ADCY6)                                                                                 |
| ADH4    | alcohol dehydrogenase 4 (class II), pi polypeptide(ADH4)                                                   |
| GPAA1   | glycosylphosphatidylinositol anchor attachment 1(GPAA1)                                                    |
| ADH1B   | alcohol dehydrogenase 1B (class I), beta polypeptide(ADH1B)                                                |
| ADH1A   | alcohol dehydrogenase 1A (class I), alpha polypeptide(ADH1A)                                               |
| GAPDHS  | glyceraldehyde-3-phosphate dehydrogenase,<br>spermatogenic(GAPDHS)                                         |
| PLIN2   | perilipin 2(PLIN2)                                                                                         |
| ADORA2B | adenosine A2b receptor(ADORA2B)                                                                            |
| ADPRH   | ADP-ribosylarginine hydrolase(ADPRH)                                                                       |
| ADORA3  | adenosine A3 receptor(ADORA3)                                                                              |
| MTNR1A  | melatonin receptor 1A(MTNR1A)                                                                              |
| KYNU    | kynureninase(KYNU)                                                                                         |
| PARP1   | poly(ADP-ribose) polymerase 1(PARP1)                                                                       |
| ADH5    | alcohol dehydrogenase 5 (class III), chi polypeptide(ADH5)                                                 |
| ADH7    | alcohol dehydrogenase 7 (class IV), mu or sigma<br>polypeptide(ADH7)                                       |
| ADH6    | alcohol dehydrogenase 6 (class V)(ADH6)                                                                    |
| ADM     | adrenomedullin(ADM)                                                                                        |
| MBD2    | methyl-CpG binding domain protein 2(MBD2)                                                                  |
| ADK     | adenosine kinase(ADK)                                                                                      |
| ADORA2A | adenosine A2a receptor(ADORA2A)                                                                            |
| ADORA1  | adenosine A1 receptor(ADORA1)                                                                              |
| ADRA2C  | adrenoceptor alpha 2C(ADRA2C)                                                                              |
| ADRB1   | adrenoceptor beta 1(ADRB1)                                                                                 |
| NUDT1   | nudix hydrolase 1(NUDT1)                                                                                   |
| ADRB2   | adrenoceptor beta 2(ADRB2)                                                                                 |
| MTHFD1  | methylenetetrahydrofolate dehydrogenase, cyclohydrolase and<br>formyltetrahydrofolate synthetase 1(MTHFD1) |
| ADRB3   | adrenoceptor beta 3(ADRB3)                                                                                 |
| MTHFR   | methylenetetrahydrofolate reductase(MTHFR)                                                                 |
| ADSL    | adenylosuccinate lyase(ADSL)                                                                               |
| ADSS    | adenylosuccinate synthase(ADSS)                                                                            |
| ADRA1D  | adrenoceptor alpha 1D(ADRA1D)                                                                              |
| ADRA1B  | adrenoceptor alpha 1B(ADRA1B)                                                                              |
| ADRA1A  | adrenoceptor alpha 1A(ADRA1A)                                                                              |
| ADRA2A  | adrenoceptor alpha 2A(ADRA2A)                                                                              |
| ADRA2B  | adrenoceptor alpha 2B(ADRA2B)                                                                              |
| AGA     | aspartylglucosaminidase(AGA)                                                                               |
| GYG2    | glycogenin 2(GYG2)                                                                                         |
| ADSSL1  | adenylosuccinate synthase like 1(ADSSL1)                                                                   |
| AGTR2   | angiotensin II receptor type 2(AGTR2)                                                                      |
| APLNR   | apelin receptor(APLNR)                                                                                     |

|         |                                                                         |
|---------|-------------------------------------------------------------------------|
| AGTR1   | angiotensin II receptor type 1(AGTR1)                                   |
| PLD4    | phospholipase D family member 4(PLD4)                                   |
| AHCY    | adenosylhomocysteinase(AHCY)                                            |
| AGXT    | alanine-glyoxylate aminotransferase(AGXT)                               |
| AGL     | amylo-alpha-1, 6-glucosidase, 4-alpha-glucanotransferase(AGL)           |
| AGT     | angiotensinogen(AGT)                                                    |
| AKT1    | AKT serine/threonine kinase 1(AKT1)                                     |
| CES5A   | carboxylesterase 5A(CES5A)                                              |
| ALDH1A3 | aldehyde dehydrogenase 1 family member A3(ALDH1A3)                      |
| ALDH3B2 | aldehyde dehydrogenase 3 family member B2(ALDH3B2)                      |
| ALDH9A1 | aldehyde dehydrogenase 9 family member A1(ALDH9A1)                      |
| ALDH1A1 | aldehyde dehydrogenase 1 family member A1(ALDH1A1)                      |
| FBXO2   | F-box protein 2(FBXO2)                                                  |
| ALDH2   | aldehyde dehydrogenase 2 family (mitochondrial)(ALDH2)                  |
| ALDH3A1 | aldehyde dehydrogenase 3 family member A1(ALDH3A1)                      |
| ALDH1B1 | aldehyde dehydrogenase 1 family member B1(ALDH1B1)                      |
| ALAS2   | 5'-aminolevulinate synthase 2(ALAS2)                                    |
| ALB     | albumin(ALB)                                                            |
| NADK    | NAD kinase(NADK)                                                        |
| TIAM2   | T-cell lymphoma invasion and metastasis 2(TIAM2)                        |
| PHGDH   | phosphoglycerate dehydrogenase(PHGDH)                                   |
| ALAD    | aminolevulinate hydratase(ALAD)                                         |
| ALAS1   | 5'-aminolevulinate synthase 1(ALAS1)                                    |
| CCL28   | C-C motif chemokine ligand 28(CCL28)                                    |
| ALOX12  | arachidonate 12-lipoxygenase, 12S type(ALOX12)                          |
| ALKBH1  | alkB homolog 1, histone H2A dioxygenase(ALKBH1)                         |
| HCAR3   | hydroxycarboxylic acid receptor 3(HCAR3)                                |
| HDAC3   | histone deacetylase 3(HDAC3)                                            |
| CTPS2   | CTP synthase 2(CTPS2)                                                   |
| AKR1B1  | aldo-keto reductase family 1 member B(AKR1B1)                           |
| GGH     | gamma-glutamyl hydrolase(GGH)                                           |
| GMPS    | guanine monophosphate synthase(GMPS)                                    |
| ALDH3A2 | aldehyde dehydrogenase 3 family member A2(ALDH3A2)                      |
| APLN    | apelin(APLN)                                                            |
| MTRR    | 5-methyltetrahydrofolate-homocysteine methyltransferase reductase(MTRR) |
| ALOX15  | arachidonate 15-lipoxygenase(ALOX15)                                    |
| ALOX15B | arachidonate 15-lipoxygenase, type B(ALOX15B)                           |
| MTR     | 5-methyltetrahydrofolate-homocysteine methyltransferase(MTR)            |
| ALOX5   | arachidonate 5-lipoxygenase(ALOX5)                                      |
| MTNR1B  | melatonin receptor 1B(MTNR1B)                                           |
| ALOX5AP | arachidonate 5-lipoxygenase activating protein(ALOX5AP)                 |
| AMT     | aminomethyltransferase(AMT)                                             |
| AMY2A   | amylase, alpha 2A (pancreatic)(AMY2A)                                   |

|         |                                                          |
|---------|----------------------------------------------------------|
| PSMB11  | proteasome subunit beta 11(PSMB11)                       |
| AMY1C   | amylase, alpha 1C (salivary)(AMY1C)                      |
| AMY1B   | amylase, alpha 1B (salivary)(AMY1B)                      |
| AMY1A   | amylase, alpha 1A (salivary)(AMY1A)                      |
| ANG     | angiogenin(ANG)                                          |
| AMY2B   | amylase, alpha 2B (pancreatic)(AMY2B)                    |
| MAT1A   | methionine adenosyltransferase 1A(MAT1A)                 |
| GGACT   | gamma-glutamylamine cyclotransferase(GGACT)              |
| MARS    | methionyl-tRNA synthetase(MARS)                          |
| SLC13A2 | solute carrier family 13 member 2(SLC13A2)               |
| SLC7A7  | solute carrier family 7 member 7(SLC7A7)                 |
| MAT2A   | methionine adenosyltransferase 2A(MAT2A)                 |
| SLC7A6  | solute carrier family 7 member 6(SLC7A6)                 |
| PAPSS1  | 3'-phosphoadenosine 5'-phosphosulfate synthase 1(PAPSS1) |
| MC2R    | melanocortin 2 receptor(MC2R)                            |
| MC3R    | melanocortin 3 receptor(MC3R)                            |
| MC1R    | melanocortin 1 receptor(MC1R)                            |
| AOAH    | acyloxyacyl hydrolase(AOAH)                              |
| MED11   | mediator complex subunit 11(MED11)                       |
| NFS1    | NFS1, cysteine desulfurase(NFS1)                         |
| ANPEP   | alanyl aminopeptidase, membrane(ANPEP)                   |
| PTH2    | parathyroid hormone 2(PTH2)                              |
| MAN1A1  | mannosidase alpha class 1A member 1(MAN1A1)              |
| MAN2A2  | mannosidase alpha class 2A member 2(MAN2A2)              |
| SUCNR1  | succinate receptor 1(SUCNR1)                             |
| MAN2A1  | mannosidase alpha class 2A member 1(MAN2A1)              |
| ANXA1   | annexin A1(ANXA1)                                        |
| MAN2B1  | mannosidase alpha class 2B member 1(MAN2B1)              |
| MANBA   | mannosidase beta(MANBA)                                  |
| ME1     | malic enzyme 1(ME1)                                      |
| APOB    | apolipoprotein B(APOB)                                   |
| APOA4   | apolipoprotein A4(APOA4)                                 |
| APOA2   | apolipoprotein A2(APOA2)                                 |
| TAS2R60 | taste 2 receptor member 60(TAS2R60)                      |
| APP     | amyloid beta precursor protein(APP)                      |
| APOH    | apolipoprotein H(APOH)                                   |
| APOE    | apolipoprotein E(APOE)                                   |
| SLC25A2 | solute carrier family 25 member 2(SLC25A2)               |
| APOC3   | apolipoprotein C3(APOC3)                                 |
| ME2     | malic enzyme 2(ME2)                                      |
| KALRN   | kalirin, RhoGEF kinase(KALRN)                            |
| ASAH2   | N-acylsphingosine amidohydrolase 2(ASAH2)                |
| APOA1   | apolipoprotein A1(APOA1)                                 |
| F2RL3   | F2R like thrombin/trypsin receptor 3(F2RL3)              |

|         |                                                                                             |
|---------|---------------------------------------------------------------------------------------------|
| ARF1    | ADP ribosylation factor 1(ARF1)                                                             |
| MC5R    | melanocortin 5 receptor(MC5R)                                                               |
| MC4R    | melanocortin 4 receptor(MC4R)                                                               |
| ARG1    | arginase 1(ARG1)                                                                            |
| CLYBL   | citrate lyase beta like(CLYBL)                                                              |
| PLOD3   | procollagen-lysine,2-oxoglutarate 5-dioxygenase 3(PLOD3)                                    |
| MCL1    | BCL2 family apoptosis regulator(MCL1)                                                       |
| SLC2A9  | solute carrier family 2 member 9(SLC2A9)                                                    |
| MGAM    | maltase-glucoamylase(MGAM)                                                                  |
| AQP7    | aquaporin 7(AQP7)                                                                           |
| P4HA2   | prolyl 4-hydroxylase subunit alpha 2(P4HA2)                                                 |
| AQP9    | aquaporin 9(AQP9)                                                                           |
| MDH1    | malate dehydrogenase 1(MDH1)                                                                |
| AR      | androgen receptor(AR)                                                                       |
| MDH2    | malate dehydrogenase 2(MDH2)                                                                |
| AQP3    | aquaporin 3 (Gill blood group)(AQP3)                                                        |
| AQP4    | aquaporin 4(AQP4)                                                                           |
| ARSA    | arylsulfatase A(ARSA)                                                                       |
| ARNTL   | aryl hydrocarbon receptor nuclear translocator like(ARNTL)                                  |
| CXCL9   | C-X-C motif chemokine ligand 9(CXCL9)                                                       |
| SLC16A7 | solute carrier family 16 member 7(SLC16A7)                                                  |
| RHOA    | ras homolog family member A(RHOA)                                                           |
| ARG2    | arginase 2(ARG2)                                                                            |
| ASNS    | asparagine synthetase (glutamine-hydrolyzing)(ASNS)                                         |
| METTL1  | methyltransferase like 1(METTL1)                                                            |
| ASPA    | aspartoacylase(ASPA)                                                                        |
| ASPH    | aspartate beta-hydroxylase(ASPH)                                                            |
| ASS1    | argininosuccinate synthase 1(ASS1)                                                          |
| LPAR2   | lysophosphatidic acid receptor 2(LPAR2)                                                     |
| ASL     | argininosuccinate lyase(ASL)                                                                |
| ASAH1   | N-acylsphingosine amidohydrolase 1(ASAH1)                                                   |
| SLC28A2 | solute carrier family 28 member 2(SLC28A2)                                                  |
| ART1    | ADP-ribosyltransferase 1(ART1)                                                              |
| SLC6A5  | solute carrier family 6 member 5(SLC6A5)                                                    |
| ART3    | ADP-ribosyltransferase 3(ART3)                                                              |
| SLC28A1 | solute carrier family 28 member 1(SLC28A1)                                                  |
| ART4    | ADP-ribosyltransferase 4 (Dombrock blood group)(ART4)                                       |
| MGAT2   | mannosyl (alpha-1,6-)-glycoprotein<br>beta-1,2-N-acetylglucosaminyltransferase(MGAT2)       |
| TAS1R3  | taste 1 receptor member 3(TAS1R3)                                                           |
| ATIC    | 5-aminoimidazole-4-carboxamide ribonucleotide<br>formyltransferase/IMP cyclohydrolase(ATIC) |
| MED8    | mediator complex subunit 8(MED8)                                                            |
| ACSM2B  | acyl-CoA synthetase medium-chain family member                                              |

|          |                                                                                                              |
|----------|--------------------------------------------------------------------------------------------------------------|
|          | 2B(ACSM2B)                                                                                                   |
| MPI      | mannose phosphate isomerase(MPI)                                                                             |
| SERPINC1 | serpin family C member 1(SERPINC1)                                                                           |
| GLB1L3   | galactosidase beta 1 like 3(GLB1L3)                                                                          |
| SLC16A3  | solute carrier family 16 member 3(SLC16A3)                                                                   |
| MOCS2    | molybdenum cofactor synthesis 2(MOCS2)                                                                       |
| ATP5C1   | ATP synthase, H <sup>+</sup> transporting, mitochondrial F1 complex, gamma polypeptide 1(ATP5C1)             |
| ATP5B    | ATP synthase, H <sup>+</sup> transporting, mitochondrial F1 complex, beta polypeptide(ATP5B)                 |
| ALDH7A1  | aldehyde dehydrogenase 7 family member A1(ALDH7A1)                                                           |
| MLN      | motilin(MLN)                                                                                                 |
| ATP5A1   | ATP synthase, H <sup>+</sup> transporting, mitochondrial F1 complex, alpha subunit 1, cardiac muscle(ATP5A1) |
| MMP9     | matrix metalloproteinase 9(MMP9)                                                                             |
| MMP2     | matrix metalloproteinase 2(MMP2)                                                                             |
| LDHAL6A  | lactate dehydrogenase A like 6A(LDHAL6A)                                                                     |
| NPY1R    | neuropeptide Y receptor Y1(NPY1R)                                                                            |
| AVP      | arginine vasopressin(AVP)                                                                                    |
| NPY2R    | neuropeptide Y receptor Y2(NPY2R)                                                                            |
| QRFP     | pyroglutamylated RFamide peptide(QRFP)                                                                       |
| GPC2     | glypican 2(GPC2)                                                                                             |
| PROK2    | prokineticin 2(PROK2)                                                                                        |
| SLC36A1  | solute carrier family 36 member 1(SLC36A1)                                                                   |
| AVPR2    | arginine vasopressin receptor 2(AVPR2)                                                                       |
| AVPR1A   | arginine vasopressin receptor 1A(AVPR1A)                                                                     |
| NMUR2    | neuromedin U receptor 2(NMUR2)                                                                               |
| NPY5R    | neuropeptide Y receptor Y5(NPY5R)                                                                            |
| B2M      | beta-2-microglobulin(B2M)                                                                                    |
| BAAT     | bile acid-CoA:amino acid N-acyltransferase(BAAT)                                                             |
| GALM     | galactose mutarotase(GALM)                                                                                   |
| NTRK1    | neurotrophic receptor tyrosine kinase 1(NTRK1)                                                               |
| NTRK2    | neurotrophic receptor tyrosine kinase 2(NTRK2)                                                               |
| ALKBH8   | alkB homolog 8, tRNA methyltransferase(ALKBH8)                                                               |
| NUP88    | nucleoporin 88(NUP88)                                                                                        |
| NTS      | neurotensin(NTS)                                                                                             |
| NT5M     | 5',3'-nucleotidase, mitochondrial(NT5M)                                                                      |
| NTSR1    | neurotensin receptor 1(NTSR1)                                                                                |
| ATP6V1C1 | ATPase H <sup>+</sup> transporting V1 subunit C1(ATP6V1C1)                                                   |
| NRF1     | nuclear respiratory factor 1(NRF1)                                                                           |
| NT5E     | 5'-nucleotidase ecto(NT5E)                                                                                   |
| PLA2G4B  | phospholipase A2 group IVB(PLA2G4B)                                                                          |
| CLPP     | caseinolytic mitochondrial matrix peptidase proteolytic subunit(CLPP)                                        |

|          |                                                                             |
|----------|-----------------------------------------------------------------------------|
| OCA2     | OCA2 melanosomal transmembrane protein(OCA2)                                |
| NCOA3    | nuclear receptor coactivator 3(NCOA3)                                       |
| ODC1     | ornithine decarboxylase 1(ODC1)                                             |
| BDH1     | 3-hydroxybutyrate dehydrogenase, type 1(BDH1)                               |
| BDKRB1   | bradykinin receptor B1(BDKRB1)                                              |
| BDKRB2   | bradykinin receptor B2(BDKRB2)                                              |
| GLT6D1   | glycosyltransferase 6 domain containing 1(GLT6D1)                           |
| BHMT     | betaine--homocysteine S-methyltransferase(BHMT)                             |
| OAT      | ornithine aminotransferase(OAT)                                             |
| PRDX5    | peroxiredoxin 5(PRDX5)                                                      |
| OPRD1    | opioid receptor delta 1(OPRD1)                                              |
| PLA2G2F  | phospholipase A2 group IIF(PLA2G2F)                                         |
| BCAT1    | branched chain amino acid transaminase 1(BCAT1)                             |
| OPRK1    | opioid receptor kappa 1(OPRK1)                                              |
| BCAT2    | branched chain amino acid transaminase 2(BCAT2)                             |
| OPRL1    | opioid related nociceptin receptor 1(OPRL1)                                 |
| AGPAT3   | 1-acylglycerol-3-phosphate O-acyltransferase 3(AGPAT3)                      |
| OPRM1    | opioid receptor mu 1(OPRM1)                                                 |
| AGPAT4   | 1-acylglycerol-3-phosphate O-acyltransferase 4(AGPAT4)                      |
| BCHE     | butyrylcholinesterase(BCHE)                                                 |
| BCKDHA   | branched chain keto acid dehydrogenase E1, alpha polypeptide(BCKDHA)        |
| BCKDHB   | branched chain keto acid dehydrogenase E1 subunit beta(BCKDHB)              |
| OGDH     | oxoglutarate dehydrogenase(OGDH)                                            |
| OGG1     | 8-oxoguanine DNA glycosylase(OGG1)                                          |
| PLA2G10  | phospholipase A2 group X(PLA2G10)                                           |
| PLA2G6   | phospholipase A2 group VI(PLA2G6)                                           |
| BTD      | biotinidase(BTD)                                                            |
| OXTR     | oxytocin receptor(OXTR)                                                     |
| OXT      | oxytocin/neurophysin I prepropeptide(OXT)                                   |
| OXCT1    | 3-oxoacid CoA-transferase 1(OXCT1)                                          |
| BSG      | basigin (Ok blood group)(BSG)                                               |
| ACY3     | aminoacylase 3(ACY3)                                                        |
| RARS2    | arginyl-tRNA synthetase 2, mitochondrial(RARS2)                             |
| SLC17A7  | solute carrier family 17 member 7(SLC17A7)                                  |
| SLC2A8   | solute carrier family 2 member 8(SLC2A8)                                    |
| SLC25A11 | solute carrier family 25 member 11(SLC25A11)                                |
| PAH      | phenylalanine hydroxylase(PAH)                                              |
| SLC17A6  | solute carrier family 17 member 6(SLC17A6)                                  |
| SERPINE1 | serpin family E member 1(SERPINE1)                                          |
| PAFAH1B2 | platelet activating factor acetylhydrolase 1b catalytic subunit 2(PAFAH1B2) |
| BBOX1    | gamma-butyrobetaine hydroxylase 1(BBOX1)                                    |

|          |                                                                              |
|----------|------------------------------------------------------------------------------|
| BMI1     | BMI1 proto-oncogene, polycomb ring finger(BMI1)                              |
| PAFAH1B1 | platelet activating factor acetylhydrolase 1b regulatory subunit 1(PAFAH1B1) |
| PAFAH2   | platelet activating factor acetylhydrolase 2(PAFAH2)                         |
| UBQLN1   | ubiquilin 1(UBQLN1)                                                          |
| PAFAH1B3 | platelet activating factor acetylhydrolase 1b catalytic subunit 3(PAFAH1B3)  |
| FURIN    | furin, paired basic amino acid cleaving enzyme(FURIN)                        |
| HCAR2    | hydroxycarboxylic acid receptor 2(HCAR2)                                     |
| PAEP     | progesterone associated endometrial protein(PAEP)                            |
| PSAT1    | phosphoserine aminotransferase 1(PSAT1)                                      |
| CXCR5    | C-X-C motif chemokine receptor 5(CXCR5)                                      |
| BLMH     | bleomycin hydrolase(BLMH)                                                    |
| P4HA1    | prolyl 4-hydroxylase subunit alpha 1(P4HA1)                                  |
| P4HB     | prolyl 4-hydroxylase subunit beta(P4HB)                                      |
| P2RY1    | purinergic receptor P2Y1(P2RY1)                                              |
| P2RY2    | purinergic receptor P2Y2(P2RY2)                                              |
| P2RY4    | pyrimidinergetic receptor P2Y4(P2RY4)                                        |
| P2RY6    | pyrimidinergetic receptor P2Y6(P2RY6)                                        |
| DAGLA    | diacylglycerol lipase alpha(DAGLA)                                           |
| SLC44A3  | solute carrier family 44 member 3(SLC44A3)                                   |
| CA2      | carbonic anhydrase 2(CA2)                                                    |
| RXFP2    | relaxin/insulin like family peptide receptor 2(RXFP2)                        |
| ADAT3    | adenosine deaminase, tRNA specific 3(ADAT3)                                  |
| AKR1B10  | aldo-keto reductase family 1 member B10(AKR1B10)                             |
| C3AR1    | complement C3a receptor 1(C3AR1)                                             |
| C3       | complement C3(C3)                                                            |
| PCK1     | phosphoenolpyruvate carboxykinase 1(PCK1)                                    |
| C5AR1    | complement C5a receptor 1(C5AR1)                                             |
| NPB      | neuropeptide B(NPB)                                                          |
| PC       | pyruvate carboxylase(PC)                                                     |
| PCBD1    | pterin-4 alpha-carbinolamine dehydratase 1(PCBD1)                            |
| C5       | complement C5(C5)                                                            |
| CANX     | calnexin(CANX)                                                               |
| P2RY12   | purinergic receptor P2Y12(P2RY12)                                            |
| CBX4     | chromobox 4(CBX4)                                                            |
| CAMK2D   | calcium/calmodulin dependent protein kinase II delta(CAMK2D)                 |
| NMNAT1   | nicotinamide nucleotide adenyltransferase 1(NMNAT1)                          |
| CAMK2B   | calcium/calmodulin dependent protein kinase II beta(CAMK2B)                  |
| SLC44A2  | solute carrier family 44 member 2(SLC44A2)                                   |
| CAMK2G   | calcium/calmodulin dependent protein kinase II gamma(CAMK2G)                 |
| CALM2    | calmodulin 2(CALM2)                                                          |



|         |                                                                                                            |
|---------|------------------------------------------------------------------------------------------------------------|
| CALM1   | calmodulin 1(CALM1)                                                                                        |
| MYLK    | myosin light chain kinase(MYLK)                                                                            |
| CAMK2A  | calcium/calmodulin dependent protein kinase II alpha(CAMK2A)                                               |
| VARS2   | valyl-tRNA synthetase 2, mitochondrial(VARS2)                                                              |
| CALR    | calreticulin(CALR)                                                                                         |
| MYO7A   | myosin VIIA(MYO7A)                                                                                         |
| CAD     | carbamoyl-phosphate synthetase 2, aspartate transcarbamylase, and dihydroorotase(CAD)                      |
| YARS    | tyrosyl-tRNA synthetase(YARS)                                                                              |
| KMO     | kynurenine 3-monooxygenase(KMO)                                                                            |
| CALCR   | calcitonin receptor(CALCR)                                                                                 |
| CASK    | calcium/calmodulin dependent serine protein kinase(CASK)                                                   |
| CALCB   | calcitonin related polypeptide beta(CALCB)                                                                 |
| CALCA   | calcitonin related polypeptide alpha(CALCA)                                                                |
| ADPGK   | ADP dependent glucokinase(ADPGK)                                                                           |
| GRHL1   | grainyhead like transcription factor 1(GRHL1)                                                              |
| NAGA    | alpha-N-acetylgalactosaminidase(NAGA)                                                                      |
| NAGLU   | N-acetyl-alpha-glucosaminidase(NAGLU)                                                                      |
| SMARCA5 | SWI/SNF related, matrix associated, actin dependent regulator of chromatin, subfamily a, member 5(SMARCA5) |
| CCK     | cholecystokinin(CCK)                                                                                       |
| CCKBR   | cholecystokinin B receptor(CCKBR)                                                                          |
| SEC61A1 | Sec61 translocon alpha 1 subunit(SEC61A1)                                                                  |
| CCKAR   | cholecystokinin A receptor(CCKAR)                                                                          |
| GPR65   | G protein-coupled receptor 65(GPR65)                                                                       |
| GPR132  | G protein-coupled receptor 132(GPR132)                                                                     |
| CCNC    | cyclin C(CCNC)                                                                                             |
| SLC5A7  | solute carrier family 5 member 7(SLC5A7)                                                                   |
| PDSS2   | prenyl (decaprenyl) diphosphate synthase, subunit 2(PDSS2)                                                 |
| PNPLA2  | patatin like phospholipase domain containing 2(PNPLA2)                                                     |
| CYSLTR2 | cysteinyl leukotriene receptor 2(CYSLTR2)                                                                  |
| CUL2    | cullin 2(CUL2)                                                                                             |
| PGLYRP4 | peptidoglycan recognition protein 4(PGLYRP4)                                                               |
| HACL1   | 2-hydroxyacyl-CoA lyase 1(HACL1)                                                                           |
| TEAD2   | TEA domain transcription factor 2(TEAD2)                                                                   |
| LPAR5   | lysophosphatidic acid receptor 5(LPAR5)                                                                    |
| NUP107  | nucleoporin 107(NUP107)                                                                                    |
| SLC43A1 | solute carrier family 43 member 1(SLC43A1)                                                                 |
| LYRM4   | LYR motif containing 4(LYRM4)                                                                              |
| PEX3    | peroxisomal biogenesis factor 3(PEX3)                                                                      |
| NDST2   | N-deacetylase and N-sulfotransferase 2(NDST2)                                                              |
| MAN1C1  | mannosidase alpha class 1C member 1(MAN1C1)                                                                |
| SLC13A3 | solute carrier family 13 member 3(SLC13A3)                                                                 |

|            |                                                                              |
|------------|------------------------------------------------------------------------------|
| RAE1       | ribonucleic acid export 1(RAE1)                                              |
| GALR3      | galanin receptor 3(GALR3)                                                    |
| CASP3      | caspase 3(CASP3)                                                             |
| CASP9      | caspase 9(CASP9)                                                             |
| ABHD12     | abhydrolase domain containing 12(ABHD12)                                     |
| CASR       | calcium sensing receptor(CASR)                                               |
| CAT        | catalase(CAT)                                                                |
| CD36       | CD36 molecule(CD36)                                                          |
| MPC2       | mitochondrial pyruvate carrier 2(MPC2)                                       |
| ALDH4A1    | aldehyde dehydrogenase 4 family member A1(ALDH4A1)                           |
| SPCS3      | signal peptidase complex subunit 3(SPCS3)                                    |
| NCOA1      | nuclear receptor coactivator 1(NCOA1)                                        |
| AKR1C3     | aldo-keto reductase family 1 member C3(AKR1C3)                               |
| ABCB11     | ATP binding cassette subfamily B member 11(ABCB11)                           |
| S1PR4      | sphingosine-1-phosphate receptor 4(S1PR4)                                    |
| PLA2G2C    | phospholipase A2 group IIC(PLA2G2C)                                          |
| AGXT2      | alanine--glyoxylate aminotransferase 2(AGXT2)                                |
| CD2        | CD2 molecule(CD2)                                                            |
| MTHFD1L    | methylenetetrahydrofolate dehydrogenase (NADP+ dependent)<br>1-like(MTHFD1L) |
| SLC32A1    | solute carrier family 32 member 1(SLC32A1)                                   |
| CBX8       | chromobox 8(CBX8)                                                            |
| DAGLB      | diacylglycerol lipase beta(DAGLB)                                            |
| RGS20      | regulator of G-protein signaling 20(RGS20)                                   |
| CDK2       | cyclin dependent kinase 2(CDK2)                                              |
| SLC25A12   | solute carrier family 25 member 12(SLC25A12)                                 |
| PLA2G4C    | phospholipase A2 group IVC(PLA2G4C)                                          |
| WWTR1      | WW domain containing transcription regulator 1(WWTR1)                        |
| NFYA       | nuclear transcription factor Y subunit alpha(NFYA)                           |
| NFYB       | nuclear transcription factor Y subunit beta(NFYB)                            |
| NFYC       | nuclear transcription factor Y subunit gamma(NFYC)                           |
| SIN3A      | SIN3 transcription regulator family member A(SIN3A)                          |
| ASPDH      | aspartate dehydrogenase domain containing(ASPDH)                             |
| NMBR       | neuromedin B receptor(NMBR)                                                  |
| CHKB-CPT1B | CHKB-CPT1B readthrough (NMD candidate)(CHKB-CPT1B)                           |
| NMB        | neuromedin B(NMB)                                                            |
| SLC26A6    | solute carrier family 26 member 6(SLC26A6)                                   |
| SCARF1     | scavenger receptor class F member 1(SCARF1)                                  |
| NOS1       | nitric oxide synthase 1(NOS1)                                                |
| NOS2       | nitric oxide synthase 2(NOS2)                                                |
| NOS3       | nitric oxide synthase 3(NOS3)                                                |
| NNMT       | nicotinamide N-methyltransferase(NNMT)                                       |
| NPAS2      | neuronal PAS domain protein 2(NPAS2)                                         |
| NPFF       | neuropeptide FF-amide peptide precursor(NPFF)                                |

|         |                                                         |
|---------|---------------------------------------------------------|
| PNP     | purine nucleoside phosphorylase(PNP)                    |
| SLC2A11 | solute carrier family 2 member 11(SLC2A11)              |
| NPY     | neuropeptide Y(NPY)                                     |
| PPP1CC  | protein phosphatase 1 catalytic subunit gamma(PPP1CC)   |
| EIF4A3  | eukaryotic translation initiation factor 4A3(EIF4A3)    |
| CHAT    | choline O-acetyltransferase(CHAT)                       |
| PPOX    | protoporphyrinogen oxidase(PPOX)                        |
| CHDH    | choline dehydrogenase(CHDH)                             |
| MLEC    | malectin(MLEC)                                          |
| SPCS2   | signal peptidase complex subunit 2(SPCS2)               |
| SLC28A3 | solute carrier family 28 member 3(SLC28A3)              |
| PTDSS1  | phosphatidylserine synthase 1(PTDSS1)                   |
| CHKA    | choline kinase alpha(CHKA)                              |
| LCLAT1  | lysocardiolipin acyltransferase 1(LCLAT1)               |
| ISYNA1  | inositol-3-phosphate synthase 1(ISYNA1)                 |
| PPBP    | pro-platelet basic protein(PPBP)                        |
| OXCT2   | 3-oxoacid CoA-transferase 2(OXCT2)                      |
| PPAT    | phosphoribosyl pyrophosphate amidotransferase(PPAT)     |
| AGPAT5  | 1-acylglycerol-3-phosphate O-acyltransferase 5(AGPAT5)  |
| CHRM4   | cholinergic receptor muscarinic 4(CHRM4)                |
| PPARG   | peroxisome proliferator activated receptor gamma(PPARG) |
| CHRM5   | cholinergic receptor muscarinic 5(CHRM5)                |
| MED1    | mediator complex subunit 1(MED1)                        |
| CHRM3   | cholinergic receptor muscarinic 3(CHRM3)                |
| CHRM1   | cholinergic receptor muscarinic 1(CHRM1)                |
| CHRM2   | cholinergic receptor muscarinic 2(CHRM2)                |
| PPARA   | peroxisome proliferator activated receptor alpha(PPARA) |
| CHKB    | choline kinase beta(CHKB)                               |
| SLC29A3 | solute carrier family 29 member 3(SLC29A3)              |
| AMDHD1  | amidohydrolase domain containing 1(AMDHD1)              |
| NPFFR1  | neuropeptide FF receptor 1(NPFFR1)                      |
| PON2    | paraoxonase 2(PON2)                                     |
| PON1    | paraoxonase 1(PON1)                                     |
| POMC    | proopiomelanocortin(POMC)                               |
| CDK8    | cyclin dependent kinase 8(CDK8)                         |
| LARS    | leucyl-tRNA synthetase(LARS)                            |
| CDKN1A  | cyclin dependent kinase inhibitor 1A(CDKN1A)            |
| CDKN2A  | cyclin dependent kinase inhibitor 2A(CDKN2A)            |
| LGALS7B | galectin 7B(LGALS7B)                                    |
| SIRT6   | sirtuin 6(SIRT6)                                        |
| SCLY    | selenocysteine lyase(SCLY)                              |
| CES1    | carboxylesterase 1(CES1)                                |
| PNLIP   | pancreatic lipase(PNLIP)                                |
| CEL     | carboxyl ester lipase(CEL)                              |

|         |                                                               |
|---------|---------------------------------------------------------------|
| LGSN    | lensin, lens protein with glutamine synthetase domain(LGSN)   |
| CGA     | glycoprotein hormones, alpha polypeptide(CGA)                 |
| PI4K2A  | phosphatidylinositol 4-kinase type 2 alpha(PI4K2A)            |
| CCR2    | C-C motif chemokine receptor 2(CCR2)                          |
| MED15   | mediator complex subunit 15(MED15)                            |
| CCR1    | C-C motif chemokine receptor 1(CCR1)                          |
| CCR7    | C-C motif chemokine receptor 7(CCR7)                          |
| CCR8    | C-C motif chemokine receptor 8(CCR8)                          |
| PIGT    | phosphatidylinositol glycan anchor biosynthesis class T(PIGT) |
| CCR3    | C-C motif chemokine receptor 3(CCR3)                          |
| CCR4    | C-C motif chemokine receptor 4(CCR4)                          |
| CCR5    | C-C motif chemokine receptor 5 (gene/pseudogene)(CCR5)        |
| LDHD    | lactate dehydrogenase D(LDHD)                                 |
| LIPT1   | lipoyltransferase 1(LIPT1)                                    |
| CCR6    | C-C motif chemokine receptor 6(CCR6)                          |
| LTB4R   | leukotriene B4 receptor(LTB4R)                                |
| ERP27   | endoplasmic reticulum protein 27(ERP27)                       |
| MED24   | mediator complex subunit 24(MED24)                            |
| PSMD6   | proteasome 26S subunit, non-ATPase 6(PSMD6)                   |
| PRKCSH  | protein kinase C substrate 80K-H(PRKCSH)                      |
| MAPK8   | mitogen-activated protein kinase 8(MAPK8)                     |
| MAPK3   | mitogen-activated protein kinase 3(MAPK3)                     |
| MAPK1   | mitogen-activated protein kinase 1(MAPK1)                     |
| CNR1    | cannabinoid receptor 1(CNR1)                                  |
| CNR2    | cannabinoid receptor 2(CNR2)                                  |
| COL1A2  | collagen type I alpha 2 chain(COL1A2)                         |
| PRKCD   | protein kinase C delta(PRKCD)                                 |
| COL1A1  | collagen type I alpha 1 chain(COL1A1)                         |
| PRKCE   | protein kinase C epsilon(PRKCE)                               |
| PDF     | peptide deformylase (mitochondrial)(PDF)                      |
| MPC1    | mitochondrial pyruvate carrier 1(MPC1)                        |
| MED12   | mediator complex subunit 12(MED12)                            |
| MED13   | mediator complex subunit 13(MED13)                            |
| NR1H4   | nuclear receptor subfamily 1 group H member 4(NR1H4)          |
| PPY     | pancreatic polypeptide(PPY)                                   |
| NUP153  | nucleoporin 153(NUP153)                                       |
| SLC44A5 | solute carrier family 44 member 5(SLC44A5)                    |
| RBX1    | ring-box 1(RBX1)                                              |
| LPGAT1  | lysophosphatidylglycerol acyltransferase 1(LPGAT1)            |
| PPP3CA  | protein phosphatase 3 catalytic subunit alpha(PPP3CA)         |
| P2RY14  | purinergic receptor P2Y14(P2RY14)                             |
| VPS29   | VPS29, retromer complex component(VPS29)                      |
| ERAP2   | endoplasmic reticulum aminopeptidase 2(ERAP2)                 |
| ACSL5   | acyl-CoA synthetase long-chain family member 5(ACSL5)         |

|         |                                                                              |
|---------|------------------------------------------------------------------------------|
| CLPS    | colipase(CLPS)                                                               |
| GFPT2   | glutamine-fructose-6-phosphate transaminase 2(GFPT2)                         |
| ETNK1   | ethanolamine kinase 1(ETNK1)                                                 |
| DPEP2   | dipeptidase 2(DPEP2)                                                         |
| GLTP    | glycolipid transfer protein(GLTP)                                            |
| CPT1A   | carnitine palmitoyltransferase 1A(CPT1A)                                     |
| NUP35   | nucleoporin 35(NUP35)                                                        |
| CPS1    | carbamoyl-phosphate synthase 1(CPS1)                                         |
| CPOX    | coproporphyrinogen oxidase(CPOX)                                             |
| PIGP    | phosphatidylinositol glycan anchor biosynthesis class P(PIGP)                |
| MED29   | mediator complex subunit 29(MED29)                                           |
| CPB2    | carboxypeptidase B2(CPB2)                                                    |
| CP      | ceruloplasmin(CP)                                                            |
| ABCB4   | ATP binding cassette subfamily B member 4(ABCB4)                             |
| CPA1    | carboxypeptidase A1(CPA1)                                                    |
| HIF3A   | hypoxia inducible factor 3 alpha subunit(HIF3A)                              |
| PIGK    | phosphatidylinositol glycan anchor biosynthesis class K(PIGK)                |
| ABCB1   | ATP binding cassette subfamily B member 1(ABCB1)                             |
| MED16   | mediator complex subunit 16(MED16)                                           |
| GNE     | glucosamine<br>(UDP-N-acetyl)-2-epimerase/N-acetylmannosamine<br>kinase(GNE) |
| RXFP4   | relaxin/insulin like family peptide receptor 4(RXFP4)                        |
| CPA4    | carboxypeptidase A4(CPA4)                                                    |
| PFAS    | phosphoribosylformylglycinamide synthase(PFAS)                               |
| GNPDA1  | glucosamine-6-phosphate deaminase 1(GNPDA1)                                  |
| MED6    | mediator complex subunit 6(MED6)                                             |
| CRH     | corticotropin releasing hormone(CRH)                                         |
| NAALAD2 | N-acetylated alpha-linked acidic dipeptidase 2(NAALAD2)                      |
| CRHR2   | corticotropin releasing hormone receptor 2(CRHR2)                            |
| CRHR1   | corticotropin releasing hormone receptor 1(CRHR1)                            |
| ALKBH2  | alkB homolog 2, alpha-ketoglutarate dependent<br>dioxygenase(ALKBH2)         |
| PFKFB3  | 6-phosphofructo-2-kinase/fructose-2,6-biphosphatase<br>3(PFKFB3)             |
| CREBBP  | CREB binding protein(CREBBP)                                                 |
| CPT2    | carnitine palmitoyltransferase 2(CPT2)                                       |
| RXFP3   | relaxin/insulin like family peptide receptor 3(RXFP3)                        |
| HIF1AN  | hypoxia inducible factor 1 alpha subunit inhibitor(HIF1AN)                   |
| SLC43A2 | solute carrier family 43 member 2(SLC43A2)                                   |
| COL10A1 | collagen type X alpha 1 chain(COL10A1)                                       |
| PENK    | proenkephalin(PENK)                                                          |
| GPC6    | glypican 6(GPC6)                                                             |
| COL3A1  | collagen type III alpha 1 chain(COL3A1)                                      |

|          |                                                                  |
|----------|------------------------------------------------------------------|
| PIPOX    | pipecolic acid and sarcosine oxidase(PIPOX)                      |
| RIMKLA   | ribosomal modification protein rimK like family member A(RIMKLA) |
| PDYN     | prodynorphin(PDYN)                                               |
| GGT6     | gamma-glutamyltransferase 6(GGT6)                                |
| PCSK1    | proprotein convertase subtilisin/kexin type 1(PCSK1)             |
| COMT     | catechol-O-methyltransferase(COMT)                               |
| SLC25A15 | solute carrier family 25 member 15(SLC25A15)                     |
| PLOD1    | procollagen-lysine,2-oxoglutarate 5-dioxygenase 1(PLOD1)         |
| NMS      | neuromedin S(NMS)                                                |
| SLC25A13 | solute carrier family 25 member 13(SLC25A13)                     |
| CTLA4    | cytotoxic T-lymphocyte associated protein 4(CTLA4)               |
| LPCAT3   | lysophosphatidylcholine acyltransferase 3(LPCAT3)                |
| CTGF     | connective tissue growth factor(CTGF)                            |
| CTH      | cystathionine gamma-lyase(CTH)                                   |
| LPAR6    | lysophosphatidic acid receptor 6(LPAR6)                          |
| CTPS1    | CTP synthase 1(CTPS1)                                            |
| PLOD2    | procollagen-lysine,2-oxoglutarate 5-dioxygenase 2(PLOD2)         |
| PMCH     | pro-melanin concentrating hormone(PMCH)                          |
| IYD      | iodotyrosine deiodinase(IYD)                                     |
| GGCT     | gamma-glutamylcyclotransferase(GGCT)                             |
| EDEM2    | ER degradation enhancing alpha-mannosidase like protein 2(EDEM2) |
| CTBP1    | C-terminal binding protein 1(CTBP1)                              |
| AASS     | aminoadipate-semialdehyde synthase(AASS)                         |
| NUP37    | nucleoporin 37(NUP37)                                            |
| PNOC     | prepronociceptin(PNOC)                                           |
| PLA2G1B  | phospholipase A2 group IB(PLA2G1B)                               |
| CTSS     | cathepsin S(CTSS)                                                |
| PKM      | pyruvate kinase, muscle(PKM)                                     |
| AKAP9    | A-kinase anchoring protein 9(AKAP9)                              |
| PLAT     | plasminogen activator, tissue type(PLAT)                         |
| PLA2G2A  | phospholipase A2 group IIA(PLA2G2A)                              |
| PLA2G4A  | phospholipase A2 group IVA(PLA2G4A)                              |
| PLA2G5   | phospholipase A2 group V(PLA2G5)                                 |
| CTSD     | cathepsin D(CTSD)                                                |
| CTSB     | cathepsin B(CTSB)                                                |
| PLCB4    | phospholipase C beta 4(PLCB4)                                    |
| PLAUR    | plasminogen activator, urokinase receptor(PLAUR)                 |
| PLAU     | plasminogen activator, urokinase(PLAU)                           |
| PLCB3    | phospholipase C beta 3(PLCB3)                                    |
| CTRL     | chymotrypsin like(CTRL)                                          |
| PLCB2    | phospholipase C beta 2(PLCB2)                                    |
| PLG      | plasminogen(PLG)                                                 |

|          |                                                                                         |
|----------|-----------------------------------------------------------------------------------------|
| PLD1     | phospholipase D1(PLD1)                                                                  |
| COLEC11  | collectin subfamily member 11(COLEC11)                                                  |
| PLD2     | phospholipase D2(PLD2)                                                                  |
| AFMID    | arylformamidase(AFMID)                                                                  |
| CS       | citrate synthase(CS)                                                                    |
| PIK3CA   | phosphatidylinositol-4,5-bisphosphate 3-kinase catalytic subunit alpha(PIK3CA)          |
| MAPK14   | mitogen-activated protein kinase 14(MAPK14)                                             |
| PIK3CG   | phosphatidylinositol-4,5-bisphosphate 3-kinase catalytic subunit gamma(PIK3CG)          |
| PIK3R1   | phosphoinositide-3-kinase regulatory subunit 1(PIK3R1)                                  |
| PIM1     | Pim-1 proto-oncogene, serine/threonine kinase(PIM1)                                     |
| CSF2     | colony stimulating factor 2(CSF2)                                                       |
| MED30    | mediator complex subunit 30(MED30)                                                      |
| RGS18    | regulator of G-protein signaling 18(RGS18)                                              |
| PSMD14   | proteasome 26S subunit, non-ATPase 14(PSMD14)                                           |
| NUP133   | nucleoporin 133(NUP133)                                                                 |
| PSME3    | proteasome activator subunit 3(PSME3)                                                   |
| CNDP2    | CNDP dipeptidase 2 (metallopeptidase M20 family)(CNDP2)                                 |
| SUDS3    | SDS3 homolog, SIN3A corepressor complex component(SUDS3)                                |
| LCMT1    | leucine carboxyl methyltransferase 1(LCMT1)                                             |
| GNG8     | G protein subunit gamma 8(GNG8)                                                         |
| SLC25A10 | solute carrier family 25 member 10(SLC25A10)                                            |
| OPN4     | opsin 4(OPN4)                                                                           |
| CST3     | cystatin C(CST3)                                                                        |
| PHYH     | phytanoyl-CoA 2-hydroxylase(PHYH)                                                       |
| GPRC6A   | G protein-coupled receptor class C group 6 member A(GPRC6A)                             |
| PIGA     | phosphatidylinositol glycan anchor biosynthesis class A(PIGA)                           |
| LRAT     | lecithin retinol acyltransferase (phosphatidylcholine--retinol O-acyltransferase)(LRAT) |
| DDC      | dopa decarboxylase(DDC)                                                                 |
| RELA     | RELA proto-oncogene, NF-kB subunit(RELA)                                                |
| DCK      | deoxycytidine kinase(DCK)                                                               |
| ACE      | angiotensin I converting enzyme(ACE)                                                    |
| REN      | renin(REN)                                                                              |
| DDX6     | DEAD-box helicase 6(DDX6)                                                               |
| MBOAT4   | membrane bound O-acyltransferase domain containing 4(MBOAT4)                            |
| DAO      | D-amino acid oxidase(DAO)                                                               |
| RHO      | rhodopsin(RHO)                                                                          |
| MBOAT2   | membrane bound O-acyltransferase domain containing 2(MBOAT2)                            |

|         |                                                                                |
|---------|--------------------------------------------------------------------------------|
| STK17B  | serine/threonine kinase 17b(STK17B)                                            |
| DARS    | aspartyl-tRNA synthetase(DARS)                                                 |
| RGS7    | regulator of G-protein signaling 7(RGS7)                                       |
| RGS10   | regulator of G-protein signaling 10(RGS10)                                     |
| ACOT13  | acyl-CoA thioesterase 13(ACOT13)                                               |
| AIMP1   | aminoacyl tRNA synthetase complex interacting multifunctional protein 1(AIMP1) |
| DBT     | dihydrolipoamide branched chain transacylase E2(DBT)                           |
| RGS2    | regulator of G-protein signaling 2(RGS2)                                       |
| RGS1    | regulator of G-protein signaling 1(RGS1)                                       |
| RGS4    | regulator of G-protein signaling 4(RGS4)                                       |
| CYTH2   | cytohesin 2(CYTH2)                                                             |
| CD274   | CD274 molecule(CD274)                                                          |
| S1PR2   | sphingosine-1-phosphate receptor 2(S1PR2)                                      |
| ACSS2   | acyl-CoA synthetase short-chain family member 2(ACSS2)                         |
| CYP7A1  | cytochrome P450 family 7 subfamily A member 1(CYP7A1)                          |
| RARS    | arginyl-tRNA synthetase(RARS)                                                  |
| SAP30BP | SAP30 binding protein(SAP30BP)                                                 |
| GPR55   | G protein-coupled receptor 55(GPR55)                                           |
| CYP4A11 | cytochrome P450 family 4 subfamily A member 11(CYP4A11)                        |
| MANEA   | mannosidase endo-alpha(MANEA)                                                  |
| CYP3A4  | cytochrome P450 family 3 subfamily A member 4(CYP3A4)                          |
| CYP2J2  | cytochrome P450 family 2 subfamily J member 2(CYP2J2)                          |
| MED14   | mediator complex subunit 14(MED14)                                             |
| SAP30L  | SAP30 like(SAP30L)                                                             |
| CYP2E1  | cytochrome P450 family 2 subfamily E member 1(CYP2E1)                          |
| RANBP2  | RAN binding protein 2(RANBP2)                                                  |
| CYP51A1 | cytochrome P450 family 51 subfamily A member 1(CYP51A1)                        |
| CYP19A1 | cytochrome P450 family 19 subfamily A member 1(CYP19A1)                        |
| CYP2A6  | cytochrome P450 family 2 subfamily A member 6(CYP2A6)                          |
| CYP1A2  | cytochrome P450 family 1 subfamily A member 2(CYP1A2)                          |
| SLC29A4 | solute carrier family 29 member 4(SLC29A4)                                     |
| CYP1B1  | cytochrome P450 family 1 subfamily B member 1(CYP1B1)                          |
| RBP1    | retinol binding protein 1(RBP1)                                                |
| MED4    | mediator complex subunit 4(MED4)                                               |
| CYP1A1  | cytochrome P450 family 1 subfamily A member 1(CYP1A1)                          |
| TBL1XR1 | transducin beta like 1 X-linked receptor 1(TBL1XR1)                            |
| KLF4    | Kruppel like factor 4(KLF4)                                                    |
| GLP2R   | glucagon like peptide 2 receptor(GLP2R)                                        |
| CYP2C19 | cytochrome P450 family 2 subfamily C member 19(CYP2C19)                        |
| RASGRF2 | Ras protein specific guanine nucleotide releasing factor 2(RASGRF2)            |
| CYP2C9  | cytochrome P450 family 2 subfamily C member 9(CYP2C9)                          |
| CYP2C8  | cytochrome P450 family 2 subfamily C member 8(CYP2C8)                          |



|          |                                                                     |
|----------|---------------------------------------------------------------------|
| RASGRF1  | Ras protein specific guanine nucleotide releasing factor 1(RASGRF1) |
| NDST3    | N-deacetylase and N-sulfotransferase 3(NDST3)                       |
| DNASE1   | deoxyribonuclease 1(DNASE1)                                         |
| RAB9A    | RAB9A, member RAS oncogene family(RAB9A)                            |
| ADIPOQ   | adiponectin, C1Q and collagen domain containing(ADIPOQ)             |
| DNMT1    | DNA methyltransferase 1(DNMT1)                                      |
| HDHD3    | haloacid dehalogenase like hydrolase domain containing 3(HDHD3)     |
| RORA     | RAR related orphan receptor A(RORA)                                 |
| DNMT3B   | DNA methyltransferase 3 beta(DNMT3B)                                |
| GRHPR    | glyoxylate and hydroxypyruvate reductase(GRHPR)                     |
| DLD      | dihydrolipoamide dehydrogenase(DLD)                                 |
| DLST     | dihydrolipoamide S-succinyltransferase(DLST)                        |
| DLG4     | discs large MAGUK scaffold protein 4(DLG4)                          |
| GNG12    | G protein subunit gamma 12(GNG12)                                   |
| RPE65    | RPE65, retinoid isomerohydrolase(RPE65)                             |
| SEC11C   | SEC11 homolog C, signal peptidase complex subunit(SEC11C)           |
| SARDH    | sarcosine dehydrogenase(SARDH)                                      |
| DNM1     | dynamamin 1(DNM1)                                                   |
| FADS2    | fatty acid desaturase 2(FADS2)                                      |
| PLD6     | phospholipase D family member 6(PLD6)                               |
| MED21    | mediator complex subunit 21(MED21)                                  |
| RNASE1   | ribonuclease A family member 1, pancreatic(RNASE1)                  |
| ACOT1    | acyl-CoA thioesterase 1(ACOT1)                                      |
| RNF2     | ring finger protein 2(RNF2)                                         |
| DHFR     | dihydrofolate reductase(DHFR)                                       |
| SLC27A6  | solute carrier family 27 member 6(SLC27A6)                          |
| MED23    | mediator complex subunit 23(MED23)                                  |
| SPCS1    | signal peptidase complex subunit 1(SPCS1)                           |
| DHODH    | dihydroorotate dehydrogenase (quinone)(DHODH)                       |
| MED26    | mediator complex subunit 26(MED26)                                  |
| MED17    | mediator complex subunit 17(MED17)                                  |
| MED7     | mediator complex subunit 7(MED7)                                    |
| MED27    | mediator complex subunit 27(MED27)                                  |
| DECR1    | 2,4-dienoyl-CoA reductase 1, mitochondrial(DECR1)                   |
| SLC16A10 | solute carrier family 16 member 10(SLC16A10)                        |
| EIF2AK3  | eukaryotic translation initiation factor 2 alpha kinase 3(EIF2AK3)  |
| PSMC5    | proteasome 26S subunit, ATPase 5(PSMC5)                             |
| PHC2     | polyhomeotic homolog 2(PHC2)                                        |
| PSMC4    | proteasome 26S subunit, ATPase 4(PSMC4)                             |
| PSMD1    | proteasome 26S subunit, non-ATPase 1(PSMD1)                         |
| PSMC6    | proteasome 26S subunit, ATPase 6(PSMC6)                             |

|         |                                                               |
|---------|---------------------------------------------------------------|
| PSMD3   | proteasome 26S subunit, non-ATPase 3(PSMD3)                   |
| PSMD2   | proteasome 26S subunit, non-ATPase 2(PSMD2)                   |
| PSMD5   | proteasome 26S subunit, non-ATPase 5(PSMD5)                   |
| PSMD4   | proteasome 26S subunit, non-ATPase 4(PSMD4)                   |
| PYY     | peptide YY(PYY)                                               |
| PSMF1   | proteasome inhibitor subunit 1(PSMF1)                         |
| EDN2    | endothelin 2(EDN2)                                            |
| PSMB10  | proteasome subunit beta 10(PSMB10)                            |
| EDN1    | endothelin 1(EDN1)                                            |
| EDNRA   | endothelin receptor type A(EDNRA)                             |
| PSMC2   | proteasome 26S subunit, ATPase 2(PSMC2)                       |
| EDN3    | endothelin 3(EDN3)                                            |
| PSMC1   | proteasome 26S subunit, ATPase 1(PSMC1)                       |
| PHC1    | polyhomeotic homolog 1(PHC1)                                  |
| EDNRB   | endothelin receptor type B(EDNRB)                             |
| PSMC3   | proteasome 26S subunit, ATPase 3(PSMC3)                       |
| PSME1   | proteasome activator subunit 1(PSME1)                         |
| PSME2   | proteasome activator subunit 2(PSME2)                         |
| ERAP1   | endoplasmic reticulum aminopeptidase 1(ERAP1)                 |
| PSPH    | phosphoserine phosphatase(PSPH)                               |
| PTAFR   | platelet activating factor receptor(PTAFR)                    |
| S1PR1   | sphingosine-1-phosphate receptor 1(S1PR1)                     |
| LPAR1   | lysophosphatidic acid receptor 1(LPAR1)                       |
| TAS2R38 | taste 2 receptor member 38(TAS2R38)                           |
| PIGL    | phosphatidylinositol glycan anchor biosynthesis class L(PIGL) |
| S1PR3   | sphingosine-1-phosphate receptor 3(S1PR3)                     |
| PSMD7   | proteasome 26S subunit, non-ATPase 7(PSMD7)                   |
| PSMD8   | proteasome 26S subunit, non-ATPase 8(PSMD8)                   |
| PSMD9   | proteasome 26S subunit, non-ATPase 9(PSMD9)                   |
| PSMD10  | proteasome 26S subunit, non-ATPase 10(PSMD10)                 |
| MED20   | mediator complex subunit 20(MED20)                            |
| PSMD11  | proteasome 26S subunit, non-ATPase 11(PSMD11)                 |
| PSMD12  | proteasome 26S subunit, non-ATPase 12(PSMD12)                 |
| PSMD13  | proteasome 26S subunit, non-ATPase 13(PSMD13)                 |
| PTGIR   | prostaglandin I2 (prostacyclin) receptor (IP)(PTGIR)          |
| PTGFR   | prostaglandin F receptor(PTGFR)                               |
| PTGS2   | prostaglandin-endoperoxide synthase 2(PTGS2)                  |
| PTGS1   | prostaglandin-endoperoxide synthase 1(PTGS1)                  |
| PTH     | parathyroid hormone(PTH)                                      |
| PSMA8   | proteasome subunit alpha 8(PSMA8)                             |
| PTGER1  | prostaglandin E receptor 1(PTGER1)                            |
| EEF1E1  | eukaryotic translation elongation factor 1 epsilon 1(EEF1E1)  |
| PTGDR   | prostaglandin D2 receptor(PTGDR)                              |
| NPEPPS  | aminopeptidase puromycin sensitive(NPEPPS)                    |

|          |                                                                   |
|----------|-------------------------------------------------------------------|
| PTGER4   | prostaglandin E receptor 4(PTGER4)                                |
| PTGER3   | prostaglandin E receptor 3(PTGER3)                                |
| PTGER2   | prostaglandin E receptor 2(PTGER2)                                |
| ADCY4    | adenylate cyclase 4(ADCY4)                                        |
| PTH2R    | parathyroid hormone 2 receptor(PTH2R)                             |
| PTHLH    | parathyroid hormone like hormone(PTHLH)                           |
| PTH1R    | parathyroid hormone 1 receptor(PTH1R)                             |
| DUT      | deoxyuridine triphosphatase(DUT)                                  |
| H6PD     | hexose-6-phosphate dehydrogenase/glucose<br>1-dehydrogenase(H6PD) |
| PSAP     | prosaposin(PSAP)                                                  |
| NEU4     | neuraminidase 4(NEU4)                                             |
| MASP1    | mannan binding lectin serine peptidase 1(MASP1)                   |
| DRD5     | dopamine receptor D5(DRD5)                                        |
| DRD4     | dopamine receptor D4(DRD4)                                        |
| DRD3     | dopamine receptor D3(DRD3)                                        |
| DRD2     | dopamine receptor D2(DRD2)                                        |
| DRD1     | dopamine receptor D1(DRD1)                                        |
| ASPG     | asparaginase(ASPG)                                                |
| PSMB6    | proteasome subunit beta 6(PSMB6)                                  |
| DPYD     | dihydropyrimidine dehydrogenase(DPYD)                             |
| PSMB7    | proteasome subunit beta 7(PSMB7)                                  |
| PSMB4    | proteasome subunit beta 4(PSMB4)                                  |
| PSMB5    | proteasome subunit beta 5(PSMB5)                                  |
| PSMB2    | proteasome subunit beta 2(PSMB2)                                  |
| PSMB3    | proteasome subunit beta 3(PSMB3)                                  |
| DPP4     | dipeptidyl peptidase 4(DPP4)                                      |
| PSMA7    | proteasome subunit alpha 7(PSMA7)                                 |
| DPEP1    | dipeptidase 1 (renal)(DPEP1)                                      |
| PSMB1    | proteasome subunit beta 1(PSMB1)                                  |
| PSMA5    | proteasome subunit alpha 5(PSMA5)                                 |
| CLOCK    | clock circadian regulator(CLOCK)                                  |
| PSMA6    | proteasome subunit alpha 6(PSMA6)                                 |
| PSMA3    | proteasome subunit alpha 3(PSMA3)                                 |
| PSMA4    | proteasome subunit alpha 4(PSMA4)                                 |
| PSMA1    | proteasome subunit alpha 1(PSMA1)                                 |
| GABBR2   | gamma-aminobutyric acid type B receptor subunit 2(GABBR2)         |
| PEX19    | peroxisomal biogenesis factor 19(PEX19)                           |
| EP300    | E1A binding protein p300(EP300)                                   |
| EPAS1    | endothelial PAS domain protein 1(EPAS1)                           |
| ALDH18A1 | aldehyde dehydrogenase 18 family member A1(ALDH18A1)              |
| ACMSD    | aminocarboxymuconate semialdehyde decarboxylase(ACMSD)            |
| PCYT2    | phosphate cytidylyltransferase 2, ethanolamine(PCYT2)             |
| RGS6     | regulator of G-protein signaling 6(RGS6)                          |

|         |                                                                                |
|---------|--------------------------------------------------------------------------------|
| PYGL    | phosphorylase, glycogen, liver(PYGL)                                           |
| PYGM    | phosphorylase, glycogen, muscle(PYGM)                                          |
| GNA14   | G protein subunit alpha 14(GNA14)                                              |
| NUP155  | nucleoporin 155(NUP155)                                                        |
| NCOR1   | nuclear receptor corepressor 1(NCOR1)                                          |
| GNAT3   | G protein subunit alpha transducin 3(GNAT3)                                    |
| SLC36A2 | solute carrier family 36 member 2(SLC36A2)                                     |
| NCOR2   | nuclear receptor corepressor 2(NCOR2)                                          |
| ENPEP   | glutamyl aminopeptidase(ENPEP)                                                 |
| SLC29A1 | solute carrier family 29 member 1 (Augustine blood group)(SLC29A1)             |
| QARS    | glutaminyl-tRNA synthetase(QARS)                                               |
| QDPR    | quinoid dihydropteridine reductase(QDPR)                                       |
| RAB3A   | RAB3A, member RAS oncogene family(RAB3A)                                       |
| CELA1   | chymotrypsin like elastase family member 1(CELA1)                              |
| GPCPD1  | glycerophosphocholine phosphodiesterase 1(GPCPD1)                              |
| EDEM1   | ER degradation enhancing alpha-mannosidase like protein 1(EDEM1)               |
| NUP93   | nucleoporin 93(NUP93)                                                          |
| QSOX1   | quiescin sulfhydryl oxidase 1(QSOX1)                                           |
| PTPN1   | protein tyrosine phosphatase, non-receptor type 1(PTPN1)                       |
| SDC3    | syndecan 3(SDC3)                                                               |
| EFNA1   | ephrin A1(EFNA1)                                                               |
| GABRR3  | gamma-aminobutyric acid type A receptor rho3 subunit (gene/pseudogene)(GABRR3) |
| SLC7A10 | solute carrier family 7 member 10(SLC7A10)                                     |
| ART5    | ADP-ribosyltransferase 5(ART5)                                                 |
| ACSS3   | acyl-CoA synthetase short-chain family member 3(ACSS3)                         |
| PTS     | 6-pyruvoyltetrahydropterin synthase(PTS)                                       |
| SAP130  | Sin3A associated protein 130(SAP130)                                           |
| SLC27A2 | solute carrier family 27 member 2(SLC27A2)                                     |
| SLC18A3 | solute carrier family 18 member A3(SLC18A3)                                    |
| SLC19A1 | solute carrier family 19 member 1(SLC19A1)                                     |
| FCER1A  | Fc fragment of IgE receptor Ia(FCER1A)                                         |
| PNPLA8  | patatin like phospholipase domain containing 8(PNPLA8)                         |
| FASN    | fatty acid synthase(FASN)                                                      |
| SLC27A5 | solute carrier family 27 member 5(SLC27A5)                                     |
| SLC16A1 | solute carrier family 16 member 1(SLC16A1)                                     |
| SLC27A4 | solute carrier family 27 member 4(SLC27A4)                                     |
| METAP2  | methionyl aminopeptidase 2(METAP2)                                             |
| SLC25A1 | solute carrier family 25 member 1(SLC25A1)                                     |
| ACSL3   | acyl-CoA synthetase long-chain family member 3(ACSL3)                          |
| SLC22A1 | solute carrier family 22 member 1(SLC22A1)                                     |
| ACSL1   | acyl-CoA synthetase long-chain family member 1(ACSL1)                          |

|          |                                                                                                            |
|----------|------------------------------------------------------------------------------------------------------------|
| SLC22A2  | solute carrier family 22 member 2(SLC22A2)                                                                 |
| ACSL4    | acyl-CoA synthetase long-chain family member 4(ACSL4)                                                      |
| SLC6A11  | solute carrier family 6 member 11(SLC6A11)                                                                 |
| SLC6A12  | solute carrier family 6 member 12(SLC6A12)                                                                 |
| FECH     | ferrochelatase(FECH)                                                                                       |
| SLC6A9   | solute carrier family 6 member 9(SLC6A9)                                                                   |
| GPC4     | glypican 4(GPC4)                                                                                           |
| SLC6A13  | solute carrier family 6 member 13(SLC6A13)                                                                 |
| SLC7A1   | solute carrier family 7 member 1(SLC7A1)                                                                   |
| SLC6A3   | solute carrier family 6 member 3(SLC6A3)                                                                   |
| SLC6A1   | solute carrier family 6 member 1(SLC6A1)                                                                   |
| PNPLA3   | patatin like phospholipase domain containing 3(PNPLA3)                                                     |
| ACOT2    | acyl-CoA thioesterase 2(ACOT2)                                                                             |
| ADAM33   | ADAM metallopeptidase domain 33(ADAM33)                                                                    |
| FCGRT    | Fc fragment of IgG receptor and transporter(FCGRT)                                                         |
| SEC61B   | Sec61 translocon beta subunit(SEC61B)                                                                      |
| FDFT1    | farnesyl-diphosphate farnesyltransferase 1(FDFT1)                                                          |
| DNAJC5   | DnaJ heat shock protein family (Hsp40) member C5(DNAJC5)                                                   |
| FCN2     | ficolin 2(FCN2)                                                                                            |
| SLC7A4   | solute carrier family 7 member 4(SLC7A4)                                                                   |
| FCGR3B   | Fc fragment of IgG receptor IIIb(FCGR3B)                                                                   |
| FH       | fumarate hydratase(FH)                                                                                     |
| FGG      | fibrinogen gamma chain(FGG)                                                                                |
| SLC25A21 | solute carrier family 25 member 21(SLC25A21)                                                               |
| GPC5     | glypican 5(GPC5)                                                                                           |
| AQP10    | aquaporin 10(AQP10)                                                                                        |
| SOD1     | superoxide dismutase 1, soluble(SOD1)                                                                      |
| FGF1     | fibroblast growth factor 1(FGF1)                                                                           |
| UTS2     | urotensin 2(UTS2)                                                                                          |
| SMARCD3  | SWI/SNF related, matrix associated, actin dependent regulator of chromatin, subfamily d, member 3(SMARCD3) |
| OXER1    | oxoeicosanoid receptor 1(OXER1)                                                                            |
| MAN1A2   | mannosidase alpha class 1A member 2(MAN1A2)                                                                |
| RXFP1    | relaxin/insulin like family peptide receptor 1(RXFP1)                                                      |
| SLC38A2  | solute carrier family 38 member 2(SLC38A2)                                                                 |
| TAS2R5   | taste 2 receptor member 5(TAS2R5)                                                                          |
| HRH4     | histamine receptor H4(HRH4)                                                                                |
| EDEM3    | ER degradation enhancing alpha-mannosidase like protein 3(EDEM3)                                           |
| PPARGC1A | PPARG coactivator 1 alpha(PPARGC1A)                                                                        |
| GLYATL2  | glycine-N-acyltransferase like 2(GLYATL2)                                                                  |
| SNAP25   | synaptosome associated protein 25(SNAP25)                                                                  |
| PROKR1   | prokineticin receptor 1(PROKR1)                                                                            |
| NPF2R2   | neuropeptide FF receptor 2(NPF2R2)                                                                         |

|         |                                                      |
|---------|------------------------------------------------------|
| SIGLEC1 | sialic acid binding Ig like lectin 1(SIGLEC1)        |
| FHL2    | four and a half LIM domains 2(FHL2)                  |
| SMPD1   | sphingomyelin phosphodiesterase 1(SMPD1)             |
| ME3     | malic enzyme 3(ME3)                                  |
| SFTPD   | surfactant protein D(SFTPD)                          |
| NMU     | neuromedin U(NMU)                                    |
| CCL27   | C-C motif chemokine ligand 27(CCL27)                 |
| EPRS    | glutamyl-prolyl-tRNA synthetase(EPRS)                |
| ESD     | esterase D(ESD)                                      |
| ESR2    | estrogen receptor 2(ESR2)                            |
| FTCD    | formimidoyltransferase cyclodeaminase(FTCD)          |
| ALDH1L1 | aldehyde dehydrogenase 1 family member L1(ALDH1L1)   |
| CHD9    | chromodomain helicase DNA binding protein 9(CHD9)    |
| HAO1    | hydroxyacid oxidase 1(HAO1)                          |
| HKDC1   | hexokinase domain containing 1(HKDC1)                |
| EXT2    | exostosin glycosyltransferase 2(EXT2)                |
| CYSLTR1 | cysteinyl leukotriene receptor 1(CYSLTR1)            |
| APOA5   | apolipoprotein A5(APOA5)                             |
| CCR9    | C-C motif chemokine receptor 9(CCR9)                 |
| EXT1    | exostosin glycosyltransferase 1(EXT1)                |
| SLC1A4  | solute carrier family 1 member 4(SLC1A4)             |
| CPLX1   | complexin 1(CPLX1)                                   |
| SLC1A6  | solute carrier family 1 member 6(SLC1A6)             |
| SLC1A5  | solute carrier family 1 member 5(SLC1A5)             |
| SLC1A1  | solute carrier family 1 member 1(SLC1A1)             |
| HSPH1   | heat shock protein family H (Hsp110) member 1(HSPH1) |
| SLC1A3  | solute carrier family 1 member 3(SLC1A3)             |
| SLC1A2  | solute carrier family 1 member 2(SLC1A2)             |
| SLC2A4  | solute carrier family 2 member 4(SLC2A4)             |
| SLC2A5  | solute carrier family 2 member 5(SLC2A5)             |
| SLC3A1  | solute carrier family 3 member 1(SLC3A1)             |
| SLC1A7  | solute carrier family 1 member 7(SLC1A7)             |
| SLC2A1  | solute carrier family 2 member 1(SLC2A1)             |
| SLC2A2  | solute carrier family 2 member 2(SLC2A2)             |
| SLC2A3  | solute carrier family 2 member 3(SLC2A3)             |
| SLC5A2  | solute carrier family 5 member 2(SLC5A2)             |
| SLC3A2  | solute carrier family 3 member 2(SLC3A2)             |
| GNG2    | G protein subunit gamma 2(GNG2)                      |
| SLC5A1  | solute carrier family 5 member 1(SLC5A1)             |
| FABP4   | fatty acid binding protein 4(FABP4)                  |
| SLC2A12 | solute carrier family 2 member 12(SLC2A12)           |
| SHMT1   | serine hydroxymethyltransferase 1(SHMT1)             |
| PLA2G3  | phospholipase A2 group III(PLA2G3)                   |
| G0S2    | G0/G1 switch 2(G0S2)                                 |

|         |                                                              |
|---------|--------------------------------------------------------------|
| F12     | coagulation factor XII(F12)                                  |
| ASRGL1  | asparaginase like 1(ASRGL1)                                  |
| AHCYL1  | adenosylhomocysteinase like 1(AHCYL1)                        |
| EDC3    | enhancer of mRNA decapping 3(EDC3)                           |
| SI      | sucrase-isomaltase(SI)                                       |
| SHMT2   | serine hydroxymethyltransferase 2(SHMT2)                     |
| FABP1   | fatty acid binding protein 1(FABP1)                          |
| FADS6   | fatty acid desaturase 6(FADS6)                               |
| F2RL1   | F2R like trypsin receptor 1(F2RL1)                           |
| F2RL2   | coagulation factor II thrombin receptor like 2(F2RL2)        |
| F2R     | coagulation factor II thrombin receptor(F2R)                 |
| NUP50   | nucleoporin 50(NUP50)                                        |
| NAGS    | N-acetylglutamate synthase(NAGS)                             |
| SLC6A19 | solute carrier family 6 member 19(SLC6A19)                   |
| SLC7A11 | solute carrier family 7 member 11(SLC7A11)                   |
| SCD     | stearoyl-CoA desaturase(SCD)                                 |
| PTGDR2  | prostaglandin D2 receptor 2(PTGDR2)                          |
| SLC6A14 | solute carrier family 6 member 14(SLC6A14)                   |
| HRH3    | histamine receptor H3(HRH3)                                  |
| MAN1B1  | mannosidase alpha class 1B member 1(MAN1B1)                  |
| GRIN3B  | glutamate ionotropic receptor NMDA type subunit 3B(GRIN3B)   |
| ACSM3   | acyl-CoA synthetase medium-chain family member 3(ACSM3)      |
| GRIN3A  | glutamate ionotropic receptor NMDA type subunit 3A(GRIN3A)   |
| PLD3    | phospholipase D family member 3(PLD3)                        |
| SAT1    | spermidine/spermine N1-acetyltransferase 1(SAT1)             |
| CA14    | carbonic anhydrase 14(CA14)                                  |
| SAA1    | serum amyloid A1(SAA1)                                       |
| NUP62   | nucleoporin 62(NUP62)                                        |
| FSHR    | follicle stimulating hormone receptor(FSHR)                  |
| FTH1    | ferritin heavy chain 1(FTH1)                                 |
| NAT8L   | N-acetyltransferase 8 like(NAT8L)                            |
| NTSR2   | neurotensin receptor 2(NTSR2)                                |
| SLC2A6  | solute carrier family 2 member 6(SLC2A6)                     |
| TREH    | trehalase(TREH)                                              |
| BAZ2A   | bromodomain adjacent to zinc finger domain 2A(BAZ2A)         |
| SDHD    | succinate dehydrogenase complex subunit D(SDHD)              |
| SDHC    | succinate dehydrogenase complex subunit C(SDHC)              |
| SDHB    | succinate dehydrogenase complex iron sulfur subunit B(SDHB)  |
| SDHA    | succinate dehydrogenase complex flavoprotein subunit A(SDHA) |
| CXCL12  | C-X-C motif chemokine ligand 12(CXCL12)                      |
| SDC4    | syndecan 4(SDC4)                                             |
| SDC1    | syndecan 1(SDC1)                                             |
| SDC2    | syndecan 2(SDC2)                                             |

|         |                                                                |
|---------|----------------------------------------------------------------|
| GAST    | gastrin(GAST)                                                  |
| CXCL5   | C-X-C motif chemokine ligand 5(CXCL5)                          |
| PDSS1   | prenyl (decaprenyl) diphosphate synthase, subunit 1(PDSS1)     |
| XCL1    | X-C motif chemokine ligand 1(XCL1)                             |
| CXCL6   | C-X-C motif chemokine ligand 6(CXCL6)                          |
| CXCL11  | C-X-C motif chemokine ligand 11(CXCL11)                        |
| CCL25   | C-C motif chemokine ligand 25(CCL25)                           |
| PGAP1   | post-GPI attachment to proteins 1(PGAP1)                       |
| CCL20   | C-C motif chemokine ligand 20(CCL20)                           |
| CCL21   | C-C motif chemokine ligand 21(CCL21)                           |
| PLA2G16 | phospholipase A2 group XVI(PLA2G16)                            |
| CCL16   | C-C motif chemokine ligand 16(CCL16)                           |
| CCL19   | C-C motif chemokine ligand 19(CCL19)                           |
| PHC3    | polyhomeotic homolog 3(PHC3)                                   |
| G6PC    | glucose-6-phosphatase catalytic subunit(G6PC)                  |
| FYN     | FYN proto-oncogene, Src family tyrosine kinase(FYN)            |
| CRLS1   | cardiolipin synthase 1(CRLS1)                                  |
| CES4A   | carboxylesterase 4A(CES4A)                                     |
| SLC7A9  | solute carrier family 7 member 9(SLC7A9)                       |
| CCL5    | C-C motif chemokine ligand 5(CCL5)                             |
| GABRA3  | gamma-aminobutyric acid type A receptor alpha3 subunit(GABRA3) |
| GABRA4  | gamma-aminobutyric acid type A receptor alpha4 subunit(GABRA4) |
| GABRA5  | gamma-aminobutyric acid type A receptor alpha5 subunit(GABRA5) |
| LPAR3   | lysophosphatidic acid receptor 3(LPAR3)                        |
| GABRA6  | gamma-aminobutyric acid type A receptor alpha6 subunit(GABRA6) |
| SCTR    | secretin receptor(SCTR)                                        |
| GABRA1  | gamma-aminobutyric acid type A receptor alpha1 subunit(GABRA1) |
| CCL2    | C-C motif chemokine ligand 2(CCL2)                             |
| GABRA2  | gamma-aminobutyric acid type A receptor alpha2 subunit(GABRA2) |
| GAA     | glucosidase alpha, acid(GAA)                                   |
| NPW     | neuropeptide W(NPW)                                            |
| GABBR1  | gamma-aminobutyric acid type B receptor subunit 1(GABBR1)      |
| SCT     | secretin(SCT)                                                  |
| UGT1A1  | UDP glucuronosyltransferase family 1 member A1(UGT1A1)         |
| UGT1A3  | UDP glucuronosyltransferase family 1 member A3(UGT1A3)         |
| ACOT12  | acyl-CoA thioesterase 12(ACOT12)                               |
| FN1     | fibronectin 1(FN1)                                             |
| FNTA    | farnesyltransferase, CAAX box, alpha(FNTA)                     |



|          |                                                             |
|----------|-------------------------------------------------------------|
| FOLH1    | folate hydrolase 1(FOLH1)                                   |
| FOS      | Fos proto-oncogene, AP-1 transcription factor subunit(FOS)  |
| FPR1     | formyl peptide receptor 1(FPR1)                             |
| FPGS     | folylpolyglutamate synthase(FPGS)                           |
| FPR3     | formyl peptide receptor 3(FPR3)                             |
| FPR2     | formyl peptide receptor 2(FPR2)                             |
| NUPL2    | nucleoporin like 2(NUPL2)                                   |
| UGT1A9   | UDP glucuronosyltransferase family 1 member A9(UGT1A9)      |
| RYR3     | ryanodine receptor 3(RYR3)                                  |
| EGLN1    | egl-9 family hypoxia inducible factor 1(EGLN1)              |
| UGT1A7   | UDP glucuronosyltransferase family 1 member A7(UGT1A7)      |
| RXRA     | retinoid X receptor alpha(RXRA)                             |
| BHMT2    | betaine--homocysteine S-methyltransferase 2(BHMT2)          |
| PLA2G4D  | phospholipase A2 group IVD(PLA2G4D)                         |
| ACSM1    | acyl-CoA synthetase medium-chain family member 1(ACSM1)     |
| ADM2     | adrenomedullin 2(ADM2)                                      |
| PHOSPHO1 | phosphoethanolamine/phosphocholine<br>phosphatase(PHOSPHO1) |
| FXN      | frataxin(FXN)                                               |
| GLIPR1   | GLI pathogenesis related 1(GLIPR1)                          |
| PLBD1    | phospholipase B domain containing 1(PLBD1)                  |
| RPS27A   | ribosomal protein S27a(RPS27A)                              |
| LIAS     | lipoic acid synthetase(LIAS)                                |
| LPCAT1   | lysophosphatidylcholine acyltransferase 1(LPCAT1)           |
| NUP85    | nucleoporin 85(NUP85)                                       |
| ACSM5    | acyl-CoA synthetase medium-chain family member 5(ACSM5)     |
| TH       | tyrosine hydroxylase(TH)                                    |
| TAAR1    | trace amine associated receptor 1(TAAR1)                    |
| GLUD1    | glutamate dehydrogenase 1(GLUD1)                            |
| GLUD2    | glutamate dehydrogenase 2(GLUD2)                            |
| TGFBR2   | transforming growth factor beta receptor 2(TGFBR2)          |
| GLS      | glutaminase(GLS)                                            |
| GLRA2    | glycine receptor alpha 2(GLRA2)                             |
| GLRB     | glycine receptor beta(GLRB)                                 |
| GLP1R    | glucagon like peptide 1 receptor(GLP1R)                     |
| GLRA1    | glycine receptor alpha 1(GLRA1)                             |
| GLDC     | glycine decarboxylase(GLDC)                                 |
| GCLM     | glutamate-cysteine ligase modifier subunit(GCLM)            |
| GCLC     | glutamate-cysteine ligase catalytic subunit(GCLC)           |
| TAS1R1   | taste 1 receptor member 1(TAS1R1)                           |
| GLB1     | galactosidase beta 1(GLB1)                                  |
| AADAT    | aminoadipate aminotransferase(AADAT)                        |
| GLA      | galactosidase alpha(GLA)                                    |
| TKT      | transketolase(TKT)                                          |

|         |                                                           |
|---------|-----------------------------------------------------------|
| GPC3    | glypican 3(GPC3)                                          |
| GK2     | glycerol kinase 2(GK2)                                    |
| GK      | glycerol kinase(GK)                                       |
| MOCOS   | molybdenum cofactor sulfurase(MOCOS)                      |
| GIPR    | gastric inhibitory polypeptide receptor(GIPR)             |
| GHSR    | growth hormone secretagogue receptor(GHSR)                |
| GHRHR   | growth hormone releasing hormone receptor(GHRHR)          |
| GIP     | gastric inhibitory polypeptide(GIP)                       |
| PROKR2  | prokineticin receptor 2(PROKR2)                           |
| GHRH    | growth hormone releasing hormone(GHRH)                    |
| ANGPTL4 | angiopoietin like 4(ANGPTL4)                              |
| GOT2    | glutamic-oxaloacetic transaminase 2(GOT2)                 |
| TM7SF2  | transmembrane 7 superfamily member 2(TM7SF2)              |
| GOT1    | glutamic-oxaloacetic transaminase 1(GOT1)                 |
| GNGT2   | G protein subunit gamma transducin 2(GNGT2)               |
| GNGT1   | G protein subunit gamma transducin 1(GNGT1)               |
| GNS     | glucosamine (N-acetyl)-6-sulfatase(GNS)                   |
| TNNC1   | troponin C1, slow skeletal and cardiac type(TNNC1)        |
| GNRHR   | gonadotropin releasing hormone receptor(GNRHR)            |
| GNRH2   | gonadotropin releasing hormone 2(GNRH2)                   |
| GNRH1   | gonadotropin releasing hormone 1(GNRH1)                   |
| GNG5    | G protein subunit gamma 5(GNG5)                           |
| GNG4    | G protein subunit gamma 4(GNG4)                           |
| GNG3    | G protein subunit gamma 3(GNG3)                           |
| GNB3    | G protein subunit beta 3(GNB3)                            |
| RHBDL2  | rhomboid like 2(RHBDL2)                                   |
| GNG10   | G protein subunit gamma 10(GNG10)                         |
| TNF     | tumor necrosis factor(TNF)                                |
| GNG7    | G protein subunit gamma 7(GNG7)                           |
| GNAQ    | G protein subunit alpha q(GNAQ)                           |
| GNAS    | GNAS complex locus(GNAS)                                  |
| SCCPDH  | saccharopine dehydrogenase (putative)(SCCPDH)             |
| GNAT1   | G protein subunit alpha transducin 1(GNAT1)               |
| SLC17A8 | solute carrier family 17 member 8(SLC17A8)                |
| GNB1    | G protein subunit beta 1(GNB1)                            |
| GNB2    | G protein subunit beta 2(GNB2)                            |
| LPCAT2  | lysophosphatidylcholine acyltransferase 2(LPCAT2)         |
| GNA15   | G protein subunit alpha 15(GNA15)                         |
| GNAI1   | G protein subunit alpha i1(GNAI1)                         |
| GNAI2   | G protein subunit alpha i2(GNAI2)                         |
| GNAI3   | G protein subunit alpha i3(GNAI3)                         |
| SDHAF2  | succinate dehydrogenase complex assembly factor 2(SDHAF2) |
| GAL     | galanin and GMAP prepropeptide(GAL)                       |
| GM2A    | GM2 ganglioside activator(GM2A)                           |

|          |                                                                                                                                        |
|----------|----------------------------------------------------------------------------------------------------------------------------------------|
| YAP1     | Yes associated protein 1(YAP1)                                                                                                         |
| GNA11    | G protein subunit alpha 11(GNA11)                                                                                                      |
| CRYL1    | crystallin lambda 1(CRYL1)                                                                                                             |
| GLUL     | glutamate-ammonia ligase(GLUL)                                                                                                         |
| TP53     | tumor protein p53(TP53)                                                                                                                |
| RSPO1    | R-spondin 1(RSPO1)                                                                                                                     |
| AKR1A1   | aldo-keto reductase family 1 member A1(AKR1A1)                                                                                         |
| TBXA2R   | thromboxane A2 receptor(TBXA2R)                                                                                                        |
| LAP3     | leucine aminopeptidase 3(LAP3)                                                                                                         |
| MED19    | mediator complex subunit 19(MED19)                                                                                                     |
| GDPD2    | glycerophosphodiester phosphodiesterase domain containing 2(GDPD2)                                                                     |
| TCEB2    | transcription elongation factor B subunit 2(TCEB2)                                                                                     |
| GART     | phosphoribosylglycinamide formyltransferase,<br>phosphoribosylglycinamide synthetase,<br>phosphoribosylaminoimidazole synthetase(GART) |
| YARS2    | tyrosyl-tRNA synthetase 2(YARS2)                                                                                                       |
| TCEB1    | transcription elongation factor B subunit 1(TCEB1)                                                                                     |
| GARS     | glycyl-tRNA synthetase(GARS)                                                                                                           |
| GAPDH    | glyceraldehyde-3-phosphate dehydrogenase(GAPDH)                                                                                        |
| GANC     | glucosidase alpha, neutral C(GANC)                                                                                                     |
| GAMT     | guanidinoacetate N-methyltransferase(GAMT)                                                                                             |
| DPP8     | dipeptidyl peptidase 8(DPP8)                                                                                                           |
| NMUR1    | neuromedin U receptor 1(NMUR1)                                                                                                         |
| QSOX2    | quiescin sulfhydryl oxidase 2(QSOX2)                                                                                                   |
| GALC     | galactosylceramidase(GALC)                                                                                                             |
| GALNS    | galactosamine (N-acetyl)-6-sulfatase(GALNS)                                                                                            |
| GALK2    | galactokinase 2(GALK2)                                                                                                                 |
| ALKBH5   | alkB homolog 5, RNA demethylase(ALKBH5)                                                                                                |
| GALK1    | galactokinase 1(GALK1)                                                                                                                 |
| GALR1    | galanin receptor 1(GALR1)                                                                                                              |
| GABRE    | gamma-aminobutyric acid type A receptor epsilon subunit(GABRE)                                                                         |
| GABRG1   | gamma-aminobutyric acid type A receptor gamma1 subunit(GABRG1)                                                                         |
| GABRG2   | gamma-aminobutyric acid type A receptor gamma2 subunit(GABRG2)                                                                         |
| GABRG3   | gamma-aminobutyric acid type A receptor gamma3 subunit(GABRG3)                                                                         |
| GABRB1   | gamma-aminobutyric acid type A receptor beta1 subunit(GABRB1)                                                                          |
| SLC22A12 | solute carrier family 22 member 12(SLC22A12)                                                                                           |
| GABRB2   | gamma-aminobutyric acid type A receptor beta2 subunit(GABRB2)                                                                          |

|         |                                                                         |
|---------|-------------------------------------------------------------------------|
| GABRB3  | gamma-aminobutyric acid type A receptor beta3 subunit(GABRB3)           |
| GABRD   | gamma-aminobutyric acid type A receptor delta subunit(GABRD)            |
| GAD2    | glutamate decarboxylase 2(GAD2)                                         |
| GABRP   | gamma-aminobutyric acid type A receptor pi subunit(GABRP)               |
| GABRR1  | gamma-aminobutyric acid type A receptor rho1 subunit(GABRR1)            |
| GABRR2  | gamma-aminobutyric acid type A receptor rho2 subunit(GABRR2)            |
| GAD1    | glutamate decarboxylase 1(GAD1)                                         |
| ALKBH4  | alkB homolog 4, lysine demethylase(ALKBH4)                              |
| GFPT1   | glutamine--fructose-6-phosphate transaminase 1(GFPT1)                   |
| GGT1    | gamma-glutamyltransferase 1(GGT1)                                       |
| B4GALT1 | beta-1,4-galactosyltransferase 1(B4GALT1)                               |
| MED31   | mediator complex subunit 31(MED31)                                      |
| MED18   | mediator complex subunit 18(MED18)                                      |
| AMDHD2  | amidohydrolase domain containing 2(AMDHD2)                              |
| GGT5    | gamma-glutamyltransferase 5(GGT5)                                       |
| COQ6    | coenzyme Q6, monooxygenase(COQ6)                                        |
| GGT7    | gamma-glutamyltransferase 7(GGT7)                                       |
| NMNAT3  | nicotinamide nucleotide adenylyltransferase 3(NMNAT3)                   |
| GPHN    | gephyrin(GPHN)                                                          |
| CNNM2   | cyclin and CBS domain divalent metal cation transport mediator 2(CNNM2) |
| TDO2    | tryptophan 2,3-dioxygenase(TDO2)                                        |
| TDG     | thymine DNA glycosylase(TDG)                                            |
| TEAD1   | TEA domain transcription factor 1(TEAD1)                                |
| GLYAT   | glycine-N-acyltransferase(GLYAT)                                        |
| GFER    | growth factor, augmenter of liver regeneration(GFER)                    |
| TEAD4   | TEA domain transcription factor 4(TEAD4)                                |
| TEAD3   | TEA domain transcription factor 3(TEAD3)                                |
| GCG     | glucagon(GCG)                                                           |
| GCH1    | GTP cyclohydrolase 1(GCH1)                                              |
| GCGR    | glucagon receptor(GCGR)                                                 |
| GCK     | glucokinase(GCK)                                                        |
| GCHFR   | GTP cyclohydrolase I feedback regulator(GCHFR)                          |
| GCKR    | glucokinase regulator(GCKR)                                             |
| TF      | transferrin(TF)                                                         |
| GCSH    | glycine cleavage system protein H(GCSH)                                 |
| GATM    | glycine amidinotransferase(GATM)                                        |
| GBA     | glucosylceramidase beta(GBA)                                            |
| SAP18   | Sin3A associated protein 18(SAP18)                                      |
| RGS19   | regulator of G-protein signaling 19(RGS19)                              |

|          |                                                               |
|----------|---------------------------------------------------------------|
| GUSB     | glucuronidase beta(GUSB)                                      |
| ADI1     | acireductone dioxygenase 1(ADI1)                              |
| GUCY1B3  | guanylate cyclase 1 soluble subunit beta(GUCY1B3)             |
| GUCY1A3  | guanylate cyclase 1 soluble subunit alpha(GUCY1A3)            |
| GUCY1A2  | guanylate cyclase 1 soluble subunit alpha 2(GUCY1A2)          |
| PIGS     | phosphatidylinositol glycan anchor biosynthesis class S(PIGS) |
| GYG1     | glycogenin 1(GYG1)                                            |
| XCL2     | X-C motif chemokine ligand 2(XCL2)                            |
| VAMP2    | vesicle associated membrane protein 2(VAMP2)                  |
| GSTZ1    | glutathione S-transferase zeta 1(GSTZ1)                       |
| GSTP1    | glutathione S-transferase pi 1(GSTP1)                         |
| MED22    | mediator complex subunit 22(MED22)                            |
| MBOAT1   | membrane bound O-acyltransferase domain containing 1(MBOAT1)  |
| SULT2A1  | sulfotransferase family 2A member 1(SULT2A1)                  |
| SUOX     | sulfite oxidase(SUOX)                                         |
| SULT1A1  | sulfotransferase family 1A member 1(SULT1A1)                  |
| HBG2     | hemoglobin subunit gamma 2(HBG2)                              |
| SERPIND1 | serpin family D member 1(SERPIND1)                            |
| RGS14    | regulator of G-protein signaling 14(RGS14)                    |
| HCK      | HCK proto-oncogene, Src family tyrosine kinase(HCK)           |
| TACR2    | tachykinin receptor 2(TACR2)                                  |
| ADAL     | adenosine deaminase like(ADAL)                                |
| TAC3     | tachykinin 3(TAC3)                                            |
| NADSYN1  | NAD synthetase 1(NADSYN1)                                     |
| TACR1    | tachykinin receptor 1(TACR1)                                  |
| TACR3    | tachykinin receptor 3(TACR3)                                  |
| SYT1     | synaptotagmin 1(SYT1)                                         |
| HDAC1    | histone deacetylase 1(HDAC1)                                  |
| SEC61A2  | Sec61 translocon alpha 2 subunit(SEC61A2)                     |
| HDAC2    | histone deacetylase 2(HDAC2)                                  |
| TAC1     | tachykinin precursor 1(TAC1)                                  |
| HEBP1    | heme binding protein 1(HEBP1)                                 |
| HCRT     | hypocretin neuropeptide precursor(HCRT)                       |
| HCRTR1   | hypocretin receptor 1(HCRTR1)                                 |
| HCRTR2   | hypocretin receptor 2(HCRTR2)                                 |
| TBL1X    | transducin beta like 1X-linked(TBL1X)                         |
| TAS2R3   | taste 2 receptor member 3(TAS2R3)                             |
| H3F3B    | H3 histone family member 3B(H3F3B)                            |
| H3F3A    | H3 histone family member 3A(H3F3A)                            |
| TMLHE    | trimethyllysine hydroxylase, epsilon(TMLHE)                   |
| TAT      | tyrosine aminotransferase(TAT)                                |
| CXCR6    | C-X-C motif chemokine receptor 6(CXCR6)                       |
| TAZ      | tafazzin(TAZ)                                                 |

|         |                                                                                                                         |
|---------|-------------------------------------------------------------------------------------------------------------------------|
| TAS2R14 | taste 2 receptor member 14(TAS2R14)                                                                                     |
| HADHB   | hydroxyacyl-CoA dehydrogenase/3-ketoacyl-CoA thiolase/enoyl-CoA hydratase (trifunctional protein), beta subunit(HADHB)  |
| HADH    | hydroxyacyl-CoA dehydrogenase(HADH)                                                                                     |
| TAS2R4  | taste 2 receptor member 4(TAS2R4)                                                                                       |
| TAS2R16 | taste 2 receptor member 16(TAS2R16)                                                                                     |
| AGRN    | agrin(AGRN)                                                                                                             |
| TAS2R1  | taste 2 receptor member 1(TAS2R1)                                                                                       |
| TAS2R9  | taste 2 receptor member 9(TAS2R9)                                                                                       |
| TAS2R8  | taste 2 receptor member 8(TAS2R8)                                                                                       |
| HADHA   | hydroxyacyl-CoA dehydrogenase/3-ketoacyl-CoA thiolase/enoyl-CoA hydratase (trifunctional protein), alpha subunit(HADHA) |
| TAS2R7  | taste 2 receptor member 7(TAS2R7)                                                                                       |
| TAS2R13 | taste 2 receptor member 13(TAS2R13)                                                                                     |
| TAS2R10 | taste 2 receptor member 10(TAS2R10)                                                                                     |
| HAGH    | hydroxyacylglutathione hydrolase(HAGH)                                                                                  |
| CXCL13  | C-X-C motif chemokine ligand 13(CXCL13)                                                                                 |
| MLNR    | motilin receptor(MLNR)                                                                                                  |
| GRK5    | G protein-coupled receptor kinase 5(GRK5)                                                                               |
| HELZ2   | helicase with zinc finger 2(HELZ2)                                                                                      |
| FFAR3   | free fatty acid receptor 3(FFAR3)                                                                                       |
| FFAR1   | free fatty acid receptor 1(FFAR1)                                                                                       |
| FFAR2   | free fatty acid receptor 2(FFAR2)                                                                                       |
| EARS2   | glutamyl-tRNA synthetase 2, mitochondrial(EARS2)                                                                        |
| IL34    | interleukin 34(IL34)                                                                                                    |
| SLC6A15 | solute carrier family 6 member 15(SLC6A15)                                                                              |
| LPCAT4  | lysophosphatidylcholine acyltransferase 4(LPCAT4)                                                                       |
| SP1     | Sp1 transcription factor(SP1)                                                                                           |
| GPT     | glutamic--pyruvic transaminase(GPT)                                                                                     |
| DARS2   | aspartyl-tRNA synthetase 2, mitochondrial(DARS2)                                                                        |
| GPC1    | glypican 1(GPC1)                                                                                                        |
| PAICS   | phosphoribosylaminoimidazole carboxylase; phosphoribosylaminoimidazolesuccinocarboxamide synthase(PAICS)                |
| NPBWR1  | neuropeptides B/W receptor 1(NPBWR1)                                                                                    |
| GPR4    | G protein-coupled receptor 4(GPR4)                                                                                      |
| XCR1    | X-C motif chemokine receptor 1(XCR1)                                                                                    |
| SRC     | SRC proto-oncogene, non-receptor tyrosine kinase(SRC)                                                                   |
| CCR10   | C-C motif chemokine receptor 10(CCR10)                                                                                  |
| UTS2R   | urotensin 2 receptor(UTS2R)                                                                                             |
| CXCR3   | C-X-C motif chemokine receptor 3(CXCR3)                                                                                 |
| SLC5A9  | solute carrier family 5 member 9(SLC5A9)                                                                                |

|         |                                                                  |
|---------|------------------------------------------------------------------|
| NPBWR2  | neuropeptides B/W receptor 2(NPBWR2)                             |
| MCHR1   | melanin concentrating hormone receptor 1(MCHR1)                  |
| LPAR4   | lysophosphatidic acid receptor 4(LPAR4)                          |
| GPR18   | G protein-coupled receptor 18(GPR18)                             |
| GPR17   | G protein-coupled receptor 17(GPR17)                             |
| GRM2    | glutamate metabotropic receptor 2(GRM2)                          |
| UNC13B  | unc-13 homolog B(UNC13B)                                         |
| GRM3    | glutamate metabotropic receptor 3(GRM3)                          |
| CARM1   | coactivator associated arginine methyltransferase 1(CARM1)       |
| GRM4    | glutamate metabotropic receptor 4(GRM4)                          |
| NCOA2   | nuclear receptor coactivator 2(NCOA2)                            |
| GRM5    | glutamate metabotropic receptor 5(GRM5)                          |
| GRM6    | glutamate metabotropic receptor 6(GRM6)                          |
| GRM7    | glutamate metabotropic receptor 7(GRM7)                          |
| GRM8    | glutamate metabotropic receptor 8(GRM8)                          |
| CXCL1   | C-X-C motif chemokine ligand 1(CXCL1)                            |
| CXCL2   | C-X-C motif chemokine ligand 2(CXCL2)                            |
| CXCL3   | C-X-C motif chemokine ligand 3(CXCL3)                            |
| GRP     | gastrin releasing peptide(GRP)                                   |
| SEMA4D  | semaphorin 4D(SEMA4D)                                            |
| PDIA3   | protein disulfide isomerase family A member 3(PDIA3)             |
| TTL     | tubulin tyrosine ligase(TTL)                                     |
| GRPR    | gastrin releasing peptide receptor(GRPR)                         |
| SST     | somatostatin(SST)                                                |
| SSTR1   | somatostatin receptor 1(SSTR1)                                   |
| SREBF2  | sterol regulatory element binding transcription factor 2(SREBF2) |
| SREBF1  | sterol regulatory element binding transcription factor 1(SREBF1) |
| GSS     | glutathione synthetase(GSS)                                      |
| GSR     | glutathione-disulfide reductase(GSR)                             |
| HYOU1   | hypoxia up-regulated 1(HYOU1)                                    |
| SLC38A4 | solute carrier family 38 member 4(SLC38A4)                       |
| MED9    | mediator complex subunit 9(MED9)                                 |
| PIGU    | phosphatidylinositol glycan anchor biosynthesis class U(PIGU)    |
| GRIA1   | glutamate ionotropic receptor AMPA type subunit 1(GRIA1)         |
| GRIA2   | glutamate ionotropic receptor AMPA type subunit 2(GRIA2)         |
| ENOPH1  | enolase-phosphatase 1(ENOPH1)                                    |
| GRIA3   | glutamate ionotropic receptor AMPA type subunit 3(GRIA3)         |
| GRIA4   | glutamate ionotropic receptor AMPA type subunit 4(GRIA4)         |
| SSTR5   | somatostatin receptor 5(SSTR5)                                   |
| GRIK3   | glutamate ionotropic receptor kainate type subunit 3(GRIK3)      |
| SSTR4   | somatostatin receptor 4(SSTR4)                                   |
| GRIK2   | glutamate ionotropic receptor kainate type subunit 2(GRIK2)      |
| SSTR3   | somatostatin receptor 3(SSTR3)                                   |
| GRIK1   | glutamate ionotropic receptor kainate type subunit 1(GRIK1)      |

|          |                                                               |
|----------|---------------------------------------------------------------|
| SSTR2    | somatostatin receptor 2(SSTR2)                                |
| GRIN2A   | glutamate ionotropic receptor NMDA type subunit 2A(GRIN2A)    |
| GRIN1    | glutamate ionotropic receptor NMDA type subunit 1(GRIN1)      |
| AGPAT2   | 1-acylglycerol-3-phosphate O-acyltransferase 2(AGPAT2)        |
| GRIN2D   | glutamate ionotropic receptor NMDA type subunit 2D(GRIN2D)    |
| GRIN2C   | glutamate ionotropic receptor NMDA type subunit 2C(GRIN2C)    |
| GRIN2B   | glutamate ionotropic receptor NMDA type subunit 2B(GRIN2B)    |
| GRM1     | glutamate metabotropic receptor 1(GRM1)                       |
| HSD17B1  | hydroxysteroid 17-beta dehydrogenase 1(HSD17B1)               |
| HRH1     | histamine receptor H1(HRH1)                                   |
| GNMT     | glycine N-methyltransferase(GNMT)                             |
| HRAS     | HRas proto-oncogene, GTPase(HRAS)                             |
| ACSS1    | acyl-CoA synthetase short-chain family member 1(ACSS1)        |
| COQ2     | coenzyme Q2, polyprenyltransferase(COQ2)                      |
| MCHR2    | melanin concentrating hormone receptor 2(MCHR2)               |
| TNFRSF21 | TNF receptor superfamily member 21(TNFRSF21)                  |
| HRH2     | histamine receptor H2(HRH2)                                   |
| HSPA8    | heat shock protein family A (Hsp70) member 8(HSPA8)           |
| HSP90AA1 | heat shock protein 90 alpha family class A member 1(HSP90AA1) |
| HSPA2    | heat shock protein family A (Hsp70) member 2(HSPA2)           |
| TAS2R43  | taste 2 receptor member 43(TAS2R43)                           |
| TAS2R31  | taste 2 receptor member 31(TAS2R31)                           |
| TAS2R46  | taste 2 receptor member 46(TAS2R46)                           |
| TAS2R30  | taste 2 receptor member 30(TAS2R30)                           |
| TAS2R19  | taste 2 receptor member 19(TAS2R19)                           |
| TAS2R20  | taste 2 receptor member 20(TAS2R20)                           |
| TAS2R39  | taste 2 receptor member 39(TAS2R39)                           |
| TAS2R40  | taste 2 receptor member 40(TAS2R40)                           |
| OXGR1    | oxoglutarate receptor 1(OXGR1)                                |
| TAS2R41  | taste 2 receptor member 41(TAS2R41)                           |
| HCAR1    | hydroxycarboxylic acid receptor 1(HCAR1)                      |
| HPRT1    | hypoxanthine phosphoribosyltransferase 1(HPRT1)               |
| GLS2     | glutaminase 2(GLS2)                                           |
| IL4I1    | interleukin 4 induced 1(IL4I1)                                |
| HPD      | 4-hydroxyphenylpyruvate dioxygenase(HPD)                      |
| TAS2R50  | taste 2 receptor member 50(TAS2R50)                           |
| NUP43    | nucleoporin 43(NUP43)                                         |
| DGAT2    | diacylglycerol O-acyltransferase 2(DGAT2)                     |
| TGS1     | trimethylguanosine synthase 1(TGS1)                           |
| HMOX1    | heme oxygenase 1(HMOX1)                                       |
| HMGCS1   | 3-hydroxy-3-methylglutaryl-CoA synthase 1(HMGCS1)             |
| PTGR1    | prostaglandin reductase 1(PTGR1)                              |
| HMGCR    | 3-hydroxy-3-methylglutaryl-CoA reductase(HMGCR)               |



|          |                                                                  |
|----------|------------------------------------------------------------------|
| HMGCS2   | 3-hydroxy-3-methylglutaryl-CoA synthase 2(HMGCS2)                |
| PLA2G12B | phospholipase A2 group XIIB(PLA2G12B)                            |
| GLYR1    | glyoxylate reductase 1 homolog(GLYR1)                            |
| NT5C1A   | 5'-nucleotidase, cytosolic IA(NT5C1A)                            |
| XDH      | xanthine dehydrogenase(XDH)                                      |
| KISS1R   | KISS1 receptor(KISS1R)                                           |
| CXCL16   | C-X-C motif chemokine ligand 16(CXCL16)                          |
| ALKBH3   | alkB homolog 3, alpha-ketoglutaratedependent dioxygenase(ALKBH3) |
| SLC29A2  | solute carrier family 29 member 2(SLC29A2)                       |
| P2RY10   | purinergic receptor P2Y10(P2RY10)                                |
| HK2      | hexokinase 2(HK2)                                                |
| SLC6A18  | solute carrier family 6 member 18(SLC6A18)                       |
| HK1      | hexokinase 1(HK1)                                                |
| HK3      | hexokinase 3(HK3)                                                |
| ARHGEF25 | Rho guanine nucleotide exchange factor 25(ARHGEF25)              |
| GLYATL1  | glycine-N-acyltransferase like 1(GLYATL1)                        |
| HIF1A    | hypoxia inducible factor 1 alpha subunit(HIF1A)                  |
| GPT2     | glutamic--pyruvic transaminase 2(GPT2)                           |
| CAPN13   | calpain 13(CAPN13)                                               |
| CNDP1    | carnosine dipeptidase 1(CNDP1)                                   |
| NUP54    | nucleoporin 54(NUP54)                                            |
| MOCS3    | molybdenum cofactor synthesis 3(MOCS3)                           |
| HGD      | homogentisate 1,2-dioxygenase(HGD)                               |
| CBX2     | chromobox 2(CBX2)                                                |
| HPGDS    | hematopoietic prostaglandin D synthase(HPGDS)                    |
| WDTC1    | WD and tetratricopeptide repeats 1(WDTC1)                        |
| VIPR2    | vasoactive intestinal peptide receptor 2(VIPR2)                  |
| VIPR1    | vasoactive intestinal peptide receptor 1(VIPR1)                  |
| VIP      | vasoactive intestinal peptide(VIP)                               |
| HLA-G    | major histocompatibility complex, class I, G(HLA-G)              |
| NT5C2    | 5'-nucleotidase, cytosolic II(NT5C2)                             |
| KDM2B    | lysine demethylase 2B(KDM2B)                                     |
| VHL      | von Hippel-Lindau tumor suppressor(VHL)                          |
| ACSM4    | acyl-CoA synthetase medium-chain family member 4(ACSM4)          |
| NUDT9    | nudix hydrolase 9(NUDT9)                                         |
| HLA-B    | major histocompatibility complex, class I, B(HLA-B)              |
| HLA-C    | major histocompatibility complex, class I, C(HLA-C)              |
| KDM2A    | lysine demethylase 2A(KDM2A)                                     |
| HLA-A    | major histocompatibility complex, class I, A(HLA-A)              |
| RIMS1    | regulating synaptic membrane exocytosis 1(RIMS1)                 |
| GOT1L1   | glutamic-oxaloacetic transaminase 1-like 1(GOT1L1)               |
| VEGFA    | vascular endothelial growth factor A(VEGFA)                      |
| LDHAL6B  | lactate dehydrogenase A like 6B(LDHAL6B)                         |

|          |                                                                  |
|----------|------------------------------------------------------------------|
| VARS     | valyl-tRNA synthetase(VARS)                                      |
| SLC2A10  | solute carrier family 2 member 10(SLC2A10)                       |
| COLEC12  | collectin subfamily member 12(COLEC12)                           |
| UROD     | uroporphyrinogen decarboxylase(UROD)                             |
| SLC25A32 | solute carrier family 25 member 32(SLC25A32)                     |
| UROS     | uroporphyrinogen III synthase(UROS)                              |
| IL6ST    | interleukin 6 signal transducer(IL6ST)                           |
| NPSR1    | neuropeptide S receptor 1(NPSR1)                                 |
| S1PR5    | sphingosine-1-phosphate receptor 5(S1PR5)                        |
| IL6      | interleukin 6(IL6)                                               |
| UMPS     | uridine monophosphate synthetase(UMPS)                           |
| PPARGC1B | PPARG coactivator 1 beta(PPARGC1B)                               |
| CXCR1    | C-X-C motif chemokine receptor 1(CXCR1)                          |
| CXCR2    | C-X-C motif chemokine receptor 2(CXCR2)                          |
| IFNB1    | interferon beta 1(IFNB1)                                         |
| MAT2B    | methionine adenosyltransferase 2B(MAT2B)                         |
| UCP2     | uncoupling protein 2(UCP2)                                       |
| UCP1     | uncoupling protein 1(UCP1)                                       |
| UCP3     | uncoupling protein 3(UCP3)                                       |
| IGF1R    | insulin like growth factor 1 receptor(IGF1R)                     |
| SUMO1    | small ubiquitin-like modifier 1(SUMO1)                           |
| UBB      | ubiquitin B(UBB)                                                 |
| UBC      | ubiquitin C(UBC)                                                 |
| PLA2G4F  | phospholipase A2 group IVF(PLA2G4F)                              |
| TXNRD1   | thioredoxin reductase 1(TXNRD1)                                  |
| TYR      | tyrosinase(TYR)                                                  |
| TYRP1    | tyrosinase related protein 1(TYRP1)                              |
| UBA52    | ubiquitin A-52 residue ribosomal protein fusion product 1(UBA52) |
| ACOT4    | acyl-CoA thioesterase 4(ACOT4)                                   |
| TXN      | thioredoxin(TXN)                                                 |
| TTF1     | transcription termination factor 1(TTF1)                         |
| SLC7A3   | solute carrier family 7 member 3(SLC7A3)                         |
| MTRNR2L2 | MT-RNR2-like 2(MTRNR2L2)                                         |
| TSHB     | thyroid stimulating hormone beta(TSHB)                           |
| TSHR     | thyroid stimulating hormone receptor(TSHR)                       |
| HSPG2    | heparan sulfate proteoglycan 2(HSPG2)                            |
| HTR1F    | 5-hydroxytryptamine receptor 1F(HTR1F)                           |
| HTR1E    | 5-hydroxytryptamine receptor 1E(HTR1E)                           |
| HTR1D    | 5-hydroxytryptamine receptor 1D(HTR1D)                           |
| HTR3A    | 5-hydroxytryptamine receptor 3A(HTR3A)                           |
| HTR2C    | 5-hydroxytryptamine receptor 2C(HTR2C)                           |
| HTR2B    | 5-hydroxytryptamine receptor 2B(HTR2B)                           |
| HTR2A    | 5-hydroxytryptamine receptor 2A(HTR2A)                           |

|         |                                                             |
|---------|-------------------------------------------------------------|
| TRHR    | thyrotropin releasing hormone receptor(TRHR)                |
| TRH     | thyrotropin releasing hormone(TRH)                          |
| HTR1B   | 5-hydroxytryptamine receptor 1B(HTR1B)                      |
| HTR1A   | 5-hydroxytryptamine receptor 1A(HTR1A)                      |
| TRIO    | trio Rho guanine nucleotide exchange factor(TRIO)           |
| IAPP    | islet amyloid polypeptide(IAPP)                             |
| HTR4    | 5-hydroxytryptamine receptor 4(HTR4)                        |
| HTR5A   | 5-hydroxytryptamine receptor 5A(HTR5A)                      |
| HTR6    | 5-hydroxytryptamine receptor 6(HTR6)                        |
| HTR7    | 5-hydroxytryptamine receptor 7(HTR7)                        |
| IARS    | isoleucyl-tRNA synthetase(IARS)                             |
| TPO     | thyroid peroxidase(TPO)                                     |
| G6PC3   | glucose-6-phosphatase catalytic subunit 3(G6PC3)            |
| TPMT    | thiopurine S-methyltransferase(TPMT)                        |
| TPR     | translocated promoter region, nuclear basket protein(TPR)   |
| TPP2    | tripeptidyl peptidase 2(TPP2)                               |
| KNG1    | kininogen 1(KNG1)                                           |
| ACSM2A  | acyl-CoA synthetase medium-chain family member 2A(ACSM2A)   |
| G6PC2   | glucose-6-phosphatase catalytic subunit 2(G6PC2)            |
| ACSL6   | acyl-CoA synthetase long-chain family member 6(ACSL6)       |
| SLC7A5  | solute carrier family 7 member 5(SLC7A5)                    |
| KISS1   | KiSS-1 metastasis-suppressor(KISS1)                         |
| KLK1    | kallikrein 1(KLK1)                                          |
| MAN2B2  | mannosidase alpha class 2B member 2(MAN2B2)                 |
| SLC38A5 | solute carrier family 38 member 5(SLC38A5)                  |
| KCNJ9   | potassium voltage-gated channel subfamily J member 9(KCNJ9) |
| KCNJ5   | potassium voltage-gated channel subfamily J member 5(KCNJ5) |
| KCNJ6   | potassium voltage-gated channel subfamily J member 6(KCNJ6) |
| KCNJ3   | potassium voltage-gated channel subfamily J member 3(KCNJ3) |
| AWAT2   | acyl-CoA wax alcohol acyltransferase 2(AWAT2)               |
| AWAT1   | acyl-CoA wax alcohol acyltransferase 1(AWAT1)               |
| PLB1    | phospholipase B1(PLB1)                                      |
| MED25   | mediator complex subunit 25(MED25)                          |
| GBA3    | glucosylceramidase beta 3 (gene/pseudogene)(GBA3)           |
| AHCYL2  | adenosylhomocysteinase like 2(AHCYL2)                       |
| AAAS    | aladin WD repeat nucleoporin(AAAS)                          |
| MED13L  | mediator complex subunit 13 like(MED13L)                    |
| KARS    | lysyl-tRNA synthetase(KARS)                                 |
| GPR68   | G protein-coupled receptor 68(GPR68)                        |
| JAK2    | Janus kinase 2(JAK2)                                        |
| TRIB3   | tribbles pseudokinase 3(TRIB3)                              |
| SIRT1   | sirtuin 1(SIRT1)                                            |
| JUN     | Jun proto-oncogene, AP-1 transcription factor subunit(JUN)  |

|         |                                                                                |
|---------|--------------------------------------------------------------------------------|
| SLC27A1 | solute carrier family 27 member 1(SLC27A1)                                     |
| QRFPR   | pyroglutamylated RFamide peptide receptor(QRFPR)                               |
| ITPR1   | inositol 1,4,5-trisphosphate receptor type 1(ITPR1)                            |
| GLRA3   | glycine receptor alpha 3(GLRA3)                                                |
| PLA2G4E | phospholipase A2 group IVE(PLA2G4E)                                            |
| SLC7A8  | solute carrier family 7 member 8(SLC7A8)                                       |
| GPAM    | glycerol-3-phosphate acyltransferase, mitochondrial(GPAM)                      |
| RDH14   | retinol dehydrogenase 14 (all-trans/9-cis/11-cis)(RDH14)                       |
| SLC44A1 | solute carrier family 44 member 1(SLC44A1)                                     |
| ITGAM   | integrin subunit alpha M(ITGAM)                                                |
| NUP214  | nucleoporin 214(NUP214)                                                        |
| GCAT    | glycine C-acetyltransferase(GCAT)                                              |
| CBX6    | chromobox 6(CBX6)                                                              |
| PARK7   | Parkinsonism associated deglycase(PARK7)                                       |
| UGT3A1  | UDP glycosyltransferase family 3 member A1(UGT3A1)                             |
| SEC61G  | Sec61 translocon gamma subunit(SEC61G)                                         |
| GBA2    | glucosylceramidase beta 2(GBA2)                                                |
| SEC11A  | SEC11 homolog A, signal peptidase complex subunit(SEC11A)                      |
| HAAO    | 3-hydroxyanthranilate 3,4-dioxygenase(HAAO)                                    |
| INSR    | insulin receptor(INSR)                                                         |
| P2RY13  | purinergic receptor P2Y13(P2RY13)                                              |
| PLA2G7  | phospholipase A2 group VII(PLA2G7)                                             |
| MGLL    | monoglyceride lipase(MGLL)                                                     |
| AIMP2   | aminoacyl tRNA synthetase complex interacting multifunctional protein 2(AIMP2) |
| CXCL10  | C-X-C motif chemokine ligand 10(CXCL10)                                        |
| NUP188  | nucleoporin 188(NUP188)                                                        |
| ACOT7   | acyl-CoA thioesterase 7(ACOT7)                                                 |
| IDO1    | indoleamine 2,3-dioxygenase 1(IDO1)                                            |
| IMPA1   | inositol monophosphatase 1(IMPA1)                                              |
| NNT     | nicotinamide nucleotide transhydrogenase(NNT)                                  |
| IL12B   | interleukin 12B(IL12B)                                                         |
| SLC16A8 | solute carrier family 16 member 8(SLC16A8)                                     |
| MED10   | mediator complex subunit 10(MED10)                                             |
| NT5C    | 5', 3'-nucleotidase, cytosolic(NT5C)                                           |
| NMNAT2  | nicotinamide nucleotide adenyltransferase 2(NMNAT2)                            |
| CD209   | CD209 molecule(CD209)                                                          |
| SLC38A1 | solute carrier family 38 member 1(SLC38A1)                                     |
| LYZ     | lysozyme(LYZ)                                                                  |
| EGLN2   | egl-9 family hypoxia inducible factor 2(EGLN2)                                 |
| EGLN3   | egl-9 family hypoxia inducible factor 3(EGLN3)                                 |
| NT5C1B  | 5'-nucleotidase, cytosolic IB(NT5C1B)                                          |
| NCOA6   | nuclear receptor coactivator 6(NCOA6)                                          |
| LRP1    | LDL receptor related protein 1(LRP1)                                           |

|          |                                                                  |
|----------|------------------------------------------------------------------|
| TAS2R42  | taste 2 receptor member 42(TAS2R42)                              |
| CARNS1   | carnosine synthase 1(CARNS1)                                     |
| LRP2     | LDL receptor related protein 2(LRP2)                             |
| CDK19    | cyclin dependent kinase 19(CDK19)                                |
| PLA2G2E  | phospholipase A2 group IIE(PLA2G2E)                              |
| LSS      | lanosterol synthase (2,3-oxidosqualene-lanosterol cyclase)(LSS)  |
| PLA2G12A | phospholipase A2 group XIIA(PLA2G12A)                            |
| CYP4F3   | cytochrome P450 family 4 subfamily F member 3(CYP4F3)            |
| LTA4H    | leukotriene A4 hydrolase(LTA4H)                                  |
| ALDH5A1  | aldehyde dehydrogenase 5 family member A1(ALDH5A1)               |
| LTC4S    | leukotriene C4 synthase(LTC4S)                                   |
| LTF      | lactotransferrin(LTF)                                            |
| HAGHL    | hydroxyacylglutathione hydrolase-like(HAGHL)                     |
| ALKBH7   | alkB homolog 7(ALKBH7)                                           |
| GPBAR1   | G protein-coupled bile acid receptor 1(GPBAR1)                   |
| SLC2A7   | solute carrier family 2 member 7(SLC2A7)                         |
| LNPEP    | leucyl and cystinyl aminopeptidase(LNPEP)                        |
| KDM6B    | lysine demethylase 6B(KDM6B)                                     |
| RIMKLB   | ribosomal modification protein rimK like family member B(RIMKLB) |
| ACSBG2   | acyl-CoA synthetase bubblegum family member 2(ACSBG2)            |
| LPL      | lipoprotein lipase(LPL)                                          |
| TREM1    | triggering receptor expressed on myeloid cells 1(TREM1)          |
| LHCGR    | lutinizing hormone/choriagonadotropin receptor(LHCGR)            |
| AARS2    | alanyl-tRNA synthetase 2, mitochondrial(AARS2)                   |
| NUP205   | nucleoporin 205(NUP205)                                          |
| LIPC     | lipase C, hepatic type(LIPC)                                     |
| LIPE     | lipase E, hormone sensitive type(LIPE)                           |
| LIPA     | lipase A, lysosomal acid type(LIPA)                              |
| MARS2    | methionyl-tRNA synthetase 2, mitochondrial(MARS2)                |
| MOGS     | mannosyl-oligosaccharide glucosidase(MOGS)                       |
| CXCR4    | C-X-C motif chemokine receptor 4(CXCR4)                          |
| FADS1    | fatty acid desaturase 1(FADS1)                                   |
| GANAB    | glucosidase II alpha subunit(GANAB)                              |
| LDHB     | lactate dehydrogenase B(LDHB)                                    |
| LDHC     | lactate dehydrogenase C(LDHC)                                    |
| LDLR     | low density lipoprotein receptor(LDLR)                           |
| B3GAT1   | beta-1,3-glucuronyltransferase 1(B3GAT1)                         |
| PSME4    | proteasome activator subunit 4(PSME4)                            |
| P4HA3    | prolyl 4-hydroxylase subunit alpha 3(P4HA3)                      |
| LCT      | lactase(LCT)                                                     |
| LDHA     | lactate dehydrogenase A(LDHA)                                    |
| LGALS7   | galectin 7(LGALS7)                                               |
| RGL1     | ral guanine nucleotide dissociation stimulator like 1(RGL1)      |

|           |                                                                   |
|-----------|-------------------------------------------------------------------|
| LGALS9    | galectin 9(LGALS9)                                                |
| LEP       | leptin(LEP)                                                       |
| LGALS2    | galectin 2(LGALS2)                                                |
| LGALS1    | galectin 1(LGALS1)                                                |
| LGALS3    | galectin 3(LGALS3)                                                |
| NUP210    | nucleoporin 210(NUP210)                                           |
| LRP8      | LDL receptor related protein 8(LRP8)                              |
| LALBA     | lactalbumin alpha(LALBA)                                          |
| UPP2      | uridine phosphorylase 2(UPP2)                                     |
| JMJD6     | arginine demethylase and lysine hydroxylase(JMJD6)                |
| LCAT      | lecithin-cholesterol acyltransferase(LCAT)                        |
| LBR       | lamin B receptor(LBR)                                             |
| ACSBG1    | acyl-CoA synthetase bubblegum family member 1(ACSBG1)             |
| PGLYRP3   | peptidoglycan recognition protein 3(PGLYRP3)                      |
| PROK1     | prokineticin 1(PROK1)                                             |
| PLCB1     | phospholipase C beta 1(PLCB1)                                     |
| GNRHR2    | gonadotropin releasing hormone receptor 2<br>(pseudogene)(GNRHR2) |
| KRAS      | KRAS proto-oncogene, GTPase(KRAS)                                 |
| NUP160    | nucleoporin 160(NUP160)                                           |
| ABHD6     | abhydrolase domain containing 6(ABHD6)                            |
| ANKRD1    | ankyrin repeat domain 1(ANKRD1)                                   |
| MT-CYB    | mitochondrially encoded cytochrome b (MT-CYB)                     |
| NT5C3L    | 5'-nucleotidase, cytosolic IIIB (NT5C3L)                          |
| KLRP      | glucosylceramidase beta 3 (gene/pseudogene) (KLRP)                |
| GLT25D2   | collagen beta(1-O)galactosyltransferase 2 (GLT25D2)               |
| GLT25D1   | collagen beta(1-O)galactosyltransferase (GLT25D1)                 |
| C10orf129 | acyl-CoA synthetase medium chain family member<br>6 (C10orf129)   |
| O3FAR1    | free fatty acid receptor 4 (O3FAR1)                               |
| IL8       | interleukin 8 (IL8)                                               |
| CCBL1     | cysteine conjugate-beta lyase, cytoplasmic (CCBL1)                |
| HRSP12    | heat-responsive protein 12 (HRSP12)                               |
| CCBL2     | kynurenine aminotransferase 3 (CCBL2)                             |
| HDHD1     | D-2-hydroxyacid dehydrogenase (HDHD1)                             |
| ADC       | acetoacetate decarboxylase (ADC)                                  |
| LPHN3     | latrophilin 3 (LPHN3)                                             |
| LPHN1     | adhesion G protein-coupled receptor L1 (LPHN1)                    |
| LPHN2     | latrophilin 2 (LPHN2)                                             |
| GPER      | G protein-coupled estrogen receptor 1 (GPER)                      |
| PPYR1     | Protein phosphatase Y regulator 1 (PPYR1)                         |
| CXCR7     | chemokine (C-X-C motif) receptor 7b (CXCR7)                       |
| AGPAT6    | 1-acylglycerol-3-phosphate O-acyltransferase 6 (AGPAT6)           |
| TENC1     | tensin 2 (TENC1)                                                  |

|          |                                                                      |
|----------|----------------------------------------------------------------------|
| AGPAT9   | 1-acylglycerol-3-phosphate O-acyltransferase 9 (AGPAT9)              |
| ADRBK1   | adrenergic, beta, receptor kinase 1 (ADRBK1)                         |
| LEPREL1  | prolyl 3-hydroxylase 2 (LEPREL1)                                     |
| LEPREL2  | prolyl 3-hydroxylase 3 (LEPREL2)                                     |
| UTS2D    | urotensin 2 domain containing (UTS2D)                                |
| SETD8    | lysine methyltransferase 5A (SETD8)                                  |
| LEPRE1   | leucine proline-enriched proteoglycan (leprecan) 1 (LEPRE1)          |
| NT5C3    | 5'-nucleotidase, cytosolic III (NT5C3)                               |
| PPAPDC1A | phosphatidic acid phosphatase type 2 domain containing 1A (PPAPDC1A) |
