# Supplementary material
Source: PubMed Central journal article supplement (PMC7656848)
Supplement: 41401_2019_352_MOESM8_ESM.pdf [file 41401_2019_352_MOESM8_ESM.pdf]

Supplementary Table8: 97 KEGG Pathway in XFZY decoction.

| KEGG Pathway ID | KEGG Pathway                                     | P-value  |
|-----------------|--------------------------------------------------|----------|
| hsa04080        | Neuroactive ligand-receptor interaction          | 1.48E-81 |
| hsa01100        | Metabolic pathways                               | 9.22E-47 |
| hsa04724        | Glutamatergic synapse                            | 5.32E-29 |
| hsa04723        | Retrograde endocannabinoid signaling             | 1.41E-20 |
| hsa04727        | GABAergic synapse                                | 8.25E-20 |
| hsa03050        | Proteasome                                       | 8.79E-18 |
| hsa00250        | Alanine, aspartate and glutamate metabolism      | 1.33E-16 |
| hsa04024        | cAMP signaling pathway                           | 3.15E-16 |
| hsa04726        | Serotonergic synapse                             | 3.66E-15 |
| hsa04713        | Circadian entrainment                            | 6.55E-15 |
| hsa04062        | Chemokine signaling pathway                      | 1.19E-14 |
| hsa04913        | Ovarian steroidogenesis                          | 6.51E-14 |
| hsa00260        | Glycine, serine and threonine metabolism         | 6.76E-14 |
| hsa05033        | Nicotine addiction                               | 2.44E-13 |
| hsa00591        | Linoleic acid metabolism                         | 3.21E-13 |
| hsa04020        | Calcium signaling pathway                        | 7.30E-13 |
| hsa05032        | Morphine addiction                               | 1.52E-12 |
| hsa04750        | Inflammatory mediator regulation of TRP channels | 4.13E-12 |
| hsa04742        | Taste transduction                               | 5.67E-12 |
| hsa04270        | Vascular smooth muscle contraction               | 1.03E-11 |
| hsa01130        | Biosynthesis of antibiotics                      | 1.30E-11 |
| hsa04923        | Regulation of lipolysis in adipocytes            | 3.09E-11 |
| hsa04912        | GnRH signaling pathway                           | 5.08E-10 |
| hsa00562        | Inositol phosphate metabolism                    | 1.04E-09 |
| hsa04725        | Cholinergic synapse                              | 2.11E-09 |
| hsa00220        | Arginine biosynthesis                            | 2.23E-09 |
| hsa00565        | Ether lipid metabolism                           | 2.24E-09 |
| hsa01200        | Carbon metabolism                                | 4.47E-09 |
| hsa00500        | Starch and sucrose metabolism                    | 8.79E-09 |
| hsa00340        | Histidine metabolism                             | 1.24E-08 |
| hsa04728        | Dopaminergic synapse                             | 1.39E-08 |
| hsa00330        | Arginine and proline metabolism                  | 1.41E-08 |
| hsa04611        | Platelet activation                              | 2.72E-08 |
| hsa00564        | Glycerophospholipid metabolism                   | 3.53E-08 |
| hsa04730        | Long-term depression                             | 5.81E-08 |
| hsa01230        | Biosynthesis of amino acids                      | 7.28E-08 |
| hsa00360        | Phenylalanine metabolism                         | 1.05E-07 |
| hsa00592        | alpha-Linolenic acid metabolism                  | 1.23E-07 |
| hsa00052        | Galactose metabolism                             | 2.30E-07 |
| hsa00590        | Arachidonic acid metabolism                      | 6.70E-07 |

|          |                                            |             |
|----------|--------------------------------------------|-------------|
| hsa04540 | Gap junction                               | 7.29E-07    |
| hsa04975 | Fat digestion and absorption               | 9.60E-07    |
| hsa00970 | Aminoacyl-tRNA biosynthesis                | 1.14E-06    |
| hsa04720 | Long-term potentiation                     | 1.14E-06    |
| hsa05031 | Amphetamine addiction                      | 1.14E-06    |
| hsa04071 | Sphingolipid signaling pathway             | 1.14E-06    |
| hsa04915 | Estrogen signaling pathway                 | 1.42E-06    |
| hsa00380 | Tryptophan metabolism                      | 1.73E-06    |
| hsa04921 | Oxytocin signaling pathway                 | 2.22E-06    |
| hsa00410 | beta-Alanine metabolism                    | 3.16E-06    |
| hsa03320 | PPAR signaling pathway                     | 5.79E-06    |
| hsa04920 | Adipocytokine signaling pathway            | 5.89E-06    |
| hsa04931 | Insulin resistance                         | 9.12E-06    |
| hsa04922 | Glucagon signaling pathway                 | 1.04E-05    |
| hsa04976 | Bile secretion                             | 1.24E-05    |
| hsa05030 | Cocaine addiction                          | 1.25E-05    |
| hsa02010 | ABC transporters                           | 1.58E-05    |
| hsa04924 | Renin secretion                            | 1.70E-05    |
| hsa00010 | Glycolysis / Gluconeogenesis               | 1.70E-05    |
| hsa04070 | Phosphatidylinositol signaling system      | 1.87E-05    |
| hsa04973 | Carbohydrate digestion and absorption      | 2.17E-05    |
| hsa00350 | Tyrosine metabolism                        | 3.80E-05    |
| hsa04066 | HIF-1 signaling pathway                    | 4.76E-05    |
| hsa04925 | Aldosterone synthesis and secretion        | 9.00E-05    |
| hsa05231 | Choline metabolism in cancer               | 1.10E-04    |
| hsa04911 | Insulin secretion                          | 1.13E-04    |
| hsa04971 | Gastric acid secretion                     | 1.37E-04    |
| hsa00270 | Cysteine and methionine metabolism         | 1.78E-04    |
| hsa00280 | Valine, leucine and isoleucine degradation | 2.14E-04    |
| hsa04919 | Thyroid hormone signaling pathway          | 2.26E-04    |
| hsa04022 | cGMP-PKG signaling pathway                 | 4.58E-04    |
| hsa05142 | Chagas disease (American trypanosomiasis)  | 5.20E-04    |
| hsa05211 | Renal cell carcinoma                       | 5.62E-04    |
| hsa00650 | Butanoate metabolism                       | 6.87E-04    |
| hsa00630 | Glyoxylate and dicarboxylate metabolism    | 6.87E-04    |
| hsa00670 | One carbon pool by folate                  | 0.001174613 |
| hsa03013 | RNA transport                              | 0.001261309 |
| hsa05200 | Pathways in cancer                         | 0.001310766 |
| hsa00061 | Fatty acid biosynthesis                    | 0.001495345 |
| hsa04910 | Insulin signaling pathway                  | 0.001764061 |
| hsa00071 | Fatty acid degradation                     | 0.001957722 |
| hsa00460 | Cyanoamino acid metabolism                 | 0.002534462 |
| hsa04930 | Type II diabetes mellitus                  | 0.002613734 |

|          |                                         |             |
|----------|-----------------------------------------|-------------|
| hsa00020 | Citrate cycle (TCA cycle)               | 0.002743375 |
| hsa04014 | Ras signaling pathway                   | 0.002719308 |
| hsa00790 | Folate biosynthesis                     | 0.0030754   |
| hsa04972 | Pancreatic secretion                    | 0.003942301 |
| hsa04916 | Melanogenesis                           | 0.003905856 |
| hsa05230 | Central carbon metabolism in cancer     | 0.005853769 |
| hsa00051 | Fructose and mannose metabolism         | 0.005903938 |
| hsa04370 | VEGF signaling pathway                  | 0.006259346 |
| hsa01212 | Fatty acid metabolism                   | 0.006464457 |
| hsa04970 | Salivary secretion                      | 0.007716165 |
| hsa05143 | African trypanosomiasis                 | 0.008241077 |
| hsa00983 | Drug metabolism - other enzymes         | 0.00905385  |
| hsa04914 | Progesterone-mediated oocyte maturation | 0.009175644 |
| hsa04015 | Rap1 signaling pathway                  | 0.009615289 |
