# Supplementary material
Source: PubMed Central journal article supplement (PMC7656848)
Supplement: 41401_2019_352_MOESM9_ESM.pdf [file 41401_2019_352_MOESM9_ESM.pdf]

Supplementary Table 9:94 KEGG Pathway in GLXBBX decoction.

| KEGG Pathway ID | KEGG Pathway                                     | P value  |
|-----------------|--------------------------------------------------|----------|
| hsa04080        | Neuroactive ligand-receptor interaction          | 2.51E-98 |
| hsa01100        | Metabolic pathways                               | 6.96E-52 |
| hsa04724        | Glutamatergic synapse                            | 8.25E-32 |
| hsa04723        | Retrograde endocannabinoid signaling             | 2.24E-31 |
| hsa04727        | GABAergic synapse                                | 8.96E-23 |
| hsa04713        | Circadian entrainment                            | 6.48E-22 |
| hsa04726        | Serotonergic synapse                             | 4.25E-21 |
| hsa03050        | Proteasome                                       | 7.00E-20 |
| hsa00250        | Alanine, aspartate and glutamate metabolism      | 1.35E-19 |
| hsa01130        | Biosynthesis of antibiotics                      | 2.95E-19 |
| hsa04020        | Calcium signaling pathway                        | 2.01E-17 |
| hsa05032        | Morphine addiction                               | 2.28E-17 |
| hsa00591        | Linoleic acid metabolism                         | 4.04E-17 |
| hsa04024        | cAMP signaling pathway                           | 4.03E-17 |
| hsa04062        | Chemokine signaling pathway                      | 2.68E-16 |
| hsa05033        | Nicotine addiction                               | 3.36E-16 |
| hsa04725        | Cholinergic synapse                              | 1.88E-14 |
| hsa00620        | Pyruvate metabolism                              | 7.64E-14 |
| hsa00590        | Arachidonic acid metabolism                      | 5.59E-13 |
| hsa00565        | Ether lipid metabolism                           | 1.13E-12 |
| hsa04750        | Inflammatory mediator regulation of TRP channels | 1.21E-12 |
| hsa04923        | Regulation of lipolysis in adipocytes            | 2.16E-12 |
| hsa04270        | Vascular smooth muscle contraction               | 2.96E-12 |
| hsa01200        | Carbon metabolism                                | 3.48E-12 |
| hsa00564        | Glycerophospholipid metabolism                   | 5.16E-12 |
| hsa04742        | Taste transduction                               | 8.44E-12 |
| hsa00592        | alpha-Linolenic acid metabolism                  | 1.35E-11 |
| hsa04915        | Estrogen signaling pathway                       | 3.27E-11 |
| hsa03320        | PPAR signaling pathway                           | 6.94E-11 |
| hsa04728        | Dopaminergic synapse                             | 9.36E-11 |
| hsa04912        | GnRH signaling pathway                           | 2.70E-10 |
| hsa00010        | Glycolysis / Gluconeogenesis                     | 3.54E-10 |
| hsa00220        | Arginine biosynthesis                            | 1.19E-09 |
| hsa04913        | Ovarian steroidogenesis                          | 1.17E-09 |
| hsa00052        | Galactose metabolism                             | 4.66E-09 |
| hsa00071        | Fatty acid degradation                           | 1.06E-08 |
| hsa00260        | Glycine, serine and threonine metabolism         | 1.41E-08 |
| hsa04730        | Long-term depression                             | 2.45E-08 |
| hsa00270        | Cysteine and methionine metabolism               | 4.66E-08 |

|          |                                            |          |
|----------|--------------------------------------------|----------|
| hsa00500 | Starch and sucrose metabolism              | 5.79E-08 |
| hsa04611 | Platelet activation                        | 5.93E-08 |
| hsa04921 | Oxytocin signaling pathway                 | 1.00E-07 |
| hsa04924 | Renin secretion                            | 1.59E-07 |
| hsa00350 | Tyrosine metabolism                        | 2.38E-07 |
| hsa00330 | Arginine and proline metabolism            | 3.28E-07 |
| hsa04975 | Fat digestion and absorption               | 5.07E-07 |
| hsa01230 | Biosynthesis of amino acids                | 6.47E-07 |
| hsa04922 | Glucagon signaling pathway                 | 8.10E-07 |
| hsa00380 | Tryptophan metabolism                      | 8.79E-07 |
| hsa04720 | Long-term potentiation                     | 1.38E-06 |
| hsa04971 | Gastric acid secretion                     | 1.51E-06 |
| hsa00650 | Butanoate metabolism                       | 1.55E-06 |
| hsa04540 | Gap junction                               | 2.15E-06 |
| hsa04973 | Carbohydrate digestion and absorption      | 2.50E-06 |
| hsa00640 | Propanoate metabolism                      | 3.10E-06 |
| hsa04066 | HIF-1 signaling pathway                    | 4.91E-06 |
| hsa00280 | Valine, leucine and isoleucine degradation | 6.25E-06 |
| hsa04972 | Pancreatic secretion                       | 9.58E-06 |
| hsa00630 | Glyoxylate and dicarboxylate metabolism    | 9.90E-06 |
| hsa00561 | Glycerolipid metabolism                    | 1.01E-05 |
| hsa00020 | Citrate cycle (TCA cycle)                  | 1.08E-05 |
| hsa05030 | Cocaine addiction                          | 1.43E-05 |
| hsa05031 | Amphetamine addiction                      | 1.51E-05 |
| hsa00410 | beta-Alanine metabolism                    | 1.90E-05 |
| hsa04911 | Insulin secretion                          | 2.11E-05 |
| hsa00340 | Histidine metabolism                       | 2.54E-05 |
| hsa04022 | cGMP-PKG signaling pathway                 | 3.76E-05 |
| hsa04071 | Sphingolipid signaling pathway             | 6.38E-05 |
| hsa04970 | Salivary secretion                         | 7.75E-05 |
| hsa04919 | Thyroid hormone signaling pathway          | 9.63E-05 |
| hsa04976 | Bile secretion                             | 1.18E-04 |
| hsa04916 | Melanogenesis                              | 1.41E-04 |
| hsa05142 | Chagas disease (American trypanosomiasis)  | 1.42E-04 |
| hsa04931 | Insulin resistance                         | 1.41E-04 |
| hsa05200 | Pathways in cancer                         | 1.44E-04 |
| hsa04920 | Adipocytokine signaling pathway            | 1.50E-04 |
| hsa00061 | Fatty acid biosynthesis                    | 2.63E-04 |
| hsa04925 | Aldosterone synthesis and secretion        | 3.76E-04 |
| hsa05230 | Central carbon metabolism in cancer        | 6.40E-04 |
| hsa00360 | Phenylalanine metabolism                   | 7.21E-04 |
| hsa00460 | Cyanoamino acid metabolism                 | 7.20E-04 |
| hsa00670 | One carbon pool by folate                  | 7.55E-04 |

|          |                                        |                 |
|----------|----------------------------------------|-----------------|
| hsa01212 | Fatty acid metabolism                  | 0.00127530<br>9 |
| hsa00860 | Porphyrin and chlorophyll metabolism   | 0.00187244<br>6 |
| hsa05211 | Renal cell carcinoma                   | 0.00212916<br>8 |
| hsa00760 | Nicotinate and nicotinamide metabolism | 0.00259911<br>6 |
| hsa04918 | Thyroid hormone synthesis              | 0.00269355<br>9 |
| hsa04930 | Type II diabetes mellitus              | 0.00362525<br>1 |
| hsa01210 | 2-Oxocarboxylic acid metabolism        | 0.00384708<br>4 |
| hsa04014 | Ras signaling pathway                  | 0.00747260<br>6 |
| hsa05231 | Choline metabolism in cancer           | 0.00858088<br>1 |
| hsa04977 | Vitamin digestion and absorption       | 0.00867016<br>3 |
| hsa05204 | Chemical carcinogenesis                | 0.00870611<br>2 |
| hsa05034 | Alcoholism                             | 0.00875422<br>3 |
